# Supplementary material for: Heterogeneity in Utilization of Optical Imaging Guided Surgery for Identifying or Preserving the Parathyroid Glands—A Meta-Narrative Review
Source: Life (Basel). 2022 Mar 8;12(3):388. doi: 10.3390/life12030388 (PMC8955594; doi:10.3390/life12030388)
Supplement: Supplementary file 1 [file life-12-00388-s001.zip › Table S2; ASReview article overview.xlsx]

## Sheet: Sheet1
record_id	type_of_reference	primary_title	first_authors	publication_year	keywords	alternate_title3	volume	language	number	start_page	end_page	doi	notes_abstract	unknown_tag	included	asreview_ranking
32	JOUR	Randomized clinical trial of intraoperative parathyroid gland angiography with indocyanine green fluorescence predicting parathyroid function after thyroid surgery.	Vidal Fortuny, J, Sadowski, S M, Belfontali, V, Guigard, S, Poncet, A, Ris, F, Karenovics, W, Triponez, F	2018/03//	Adult, Aged, Female, Fluorescent Dyes, Follow-Up Studies, Humans, Hypoparathyroidism, Indocyanine Green, Intraoperative Care, Male, Middle Aged, Optical Imaging, Parathyroid Glands, Postoperative Complications, Prospective Studies, Thyroidectomy, diagnosis, diagnostic imaging, etiology, methods	The British journal of surgery	105	eng	4	350	357	10.1002/bjs.10783	BACKGROUND: Hypoparathyroidism, the most common complication after thyroid surgery, leads to hypocalcaemia and significant medical problems. An RCT was undertaken to determine whether intraoperative parathyroid gland angiography with indocyanine green (ICG) could predict postoperative hypoparathyroidism, and obviate the need for systematic blood tests and oral calcium supplementation. METHODS: Be…		1	1
34	JOUR	Association of Autofluorescence-Based Detection of the Parathyroid Glands During Total Thyroidectomy With Postoperative Hypocalcemia Risk: Results of the PARAFLUO Multicenter Randomized Clinical Trial.	Benmiloud, Fares, Godiris-Petit, Gaelle, Gras, RÃ©gis, Gillot, Jean-Charles, Turrin, Nicolas, Penaranda, Guillaume, Noullet, SÃ©verine, ChÃ©reau, Nathalie, Gaudart, Jean, Chiche, Laurent, Rebaudet, Stanislas	2020/02//	Female, Fluorescence, Humans, Hypocalcemia, Intraoperative Period, Male, Middle Aged, Optical Imaging, Organs at Risk, Parathyroid Glands, Postoperative Complications, Prospective Studies, Single-Blind Method, Surgical Wound, Thyroidectomy, Transplantation, Autologous, adverse effects, diagnostic imaging, etiology, injuries, methods, prevention & control, transplantation	JAMA surgery	155	eng	2	106	112	10.1001/jamasurg.2019.4613	IMPORTANCE: Because inadvertent damage of parathyroid glands can lead to postoperative hypocalcemia, their identification and preservation, which can be challenging, are pivotal during total thyroidectomy. OBJECTIVE: To determine if intraoperative imaging systems using near-infrared autofluorescence (NIRAF) light to identify parathyroid glands could improve parathyroid preservation and reduce pos…		1	2
189	JOUR	Assessing Intraoperative Laser Speckle Contrast Imaging of Parathyroid Glands in Relation to Thyroidectomy Patient Outcomes.	Mannoh, Emmanuel A, Thomas, Giju, Baregamian, Naira, Rohde, Sarah, Solorzano, Carmen C, Mahadevan-Jansen, Anita	2021/06//		Thyroid : official journal of the American Thyroid Association		eng				10.1089/thy.2021.0093	BACKGROUND: Accurate assessment of parathyroid gland vascularity is important during thyroidectomy to preserve the function of parathyroid glands and prevent postoperative hypocalcemia. Laser speckle contrast imaging (LSCI) has been shown to be accurate in detecting differences in parathyroid vascularity. In this surgeon-blinded prognostic study, we evaluate the relationship between intraoperativ…		1	3
146	JOUR	Parathyroid gland angiography with indocyanine green fluorescence to predict parathyroid function after thyroid surgery.	Vidal Fortuny, J, Belfontali, V, Sadowski, S M, Karenovics, W, Guigard, S, Triponez, F	2016/04//	Adult, Aged, Female, Fluorescent Dyes, Follow-Up Studies, Humans, Hypoparathyroidism, Indocyanine Green, Intraoperative Care, Male, Middle Aged, Parathyroid Glands, Pilot Projects, Postoperative Complications, Thyroidectomy, blood supply, diagnosis, etiology, methods	The British journal of surgery	103	eng	5	537	543	10.1002/bjs.10101	BACKGROUND: Postoperative hypoparathyroidism remains the most common complication following thyroidectomy. The aim of this pilot study was to evaluate the use of intraoperative parathyroid gland angiography in predicting normal parathyroid gland function after thyroid surgery. METHODS: Angiography with the fluorescent dye indocyanine green (ICG) was performed in patients undergoing total thyroide…		1	4
110	JOUR	Research on Intra-Operative Indocyanine Green Angiography of the Parathyroid for Predicting Postoperative Hypoparathyroidism: A Noninferior Randomized Controlled Trial.	Jin, Hao, Cui, Min	2020/12//	Angiography, Calcium, Humans, Hypoparathyroidism, Indocyanine Green, Parathyroid Glands, Parathyroid Hormone, Thyroidectomy, diagnostic imaging, surgery	Endocrine practice : official journal of the American College of Endocrinology and the American Association of Clinical Endocrinologists	26	eng	12	1469	1476	10.4158/EP-2020-0340	OBJECTIVE: A noninferiority randomized controlled trial was undertaken to clarify whether the postoperative measurements of serum calcium and parathyroid hormone and oral supplementation of calcium and calcitriol could be omitted if patients had at least one well-perfused parathyroid gland evaluated by intra-operative indocyanine green (ICG) angiography. METHODS: Patients with at least one parath…		1	5
48	JOUR	STUDY OF INTRAOPERATIVE INDOCYANINE GREEN ANGIOGRAPHY EFFECTIVENESS FOR IDENTIFICATION OF PARATHYROID GLANDS DURING TOTAL THYROIDECTOMY.	Parfentiev, R, Grubnik, V, Grubnik, V, Bugridze, Z, Giuashvili, S, Beselia, L	2021/05//	Angiography, Germany, Humans, Indocyanine Green, Parathyroid Glands, Parathyroid Hormone, Postoperative Complications, Thyroidectomy, adverse effects, diagnostic imaging, surgery	Georgian medical news		eng	314	26	29		Postoperative hypocalcemia is a common complication of thyroidectomy. This problem is most often associated with accidental devascularisation or excision of the parathyroid glands (PG). Aim was study near-infrared fluorescent imaging with intraoperative parathyroid gland indocyanine green angiography to help identify and preserve parathyroid glands during total thyroidectomy in order to avoid pos…		1	6
39	JOUR	Research on indocyanine green angiography for predicting postoperative hypoparathyroidism.	Jin, Hao, Dong, Qichao, He, Zhuocheng, Fan, Jinrui, Liao, Kun, Cui, Min	2019/03//	Adult, Angiography, Female, Humans, Hypoparathyroidism, Indocyanine Green, Male, Middle Aged, Parathyroid Glands, Postoperative Complications, Thyroidectomy, adverse effects, diagnostic imaging, etiology, prevention & control	Clinical endocrinology	90	eng	3	487	493	10.1111/cen.13925	BACKGROUND: It may be critical to locate the parathyroid for surgeons during thyroidectomy or parathyroidectomy due to the significant function of the parathyroid in calcium balance. According to recent reports, the intrinsic fluorescence of the parathyroid has been found. There is some evidence supporting that new equipment can detect fluorescence via imaging technology. In this study, a newly i…		1	7
92	JOUR	Application of a Fluorescence Imaging System with Indocyanine Green to Protect the Parathyroid Gland Intraoperatively and to Predict Postoperative Parathyroidism.	Jin, Hao, Dong, Qichao, He, Zhuocheng, Fan, Jinrui, Liao, Kun, Cui, Min	2018/12//	Adult, Aged, Female, Humans, Hypoparathyroidism, Indocyanine Green, Male, Middle Aged, Optical Imaging, Parathyroid Glands, Postoperative Period, Thyroid Neoplasms, Thyroidectomy, administration & dosage, adverse effects, metabolism, methods, pharmacokinetics, prevention & control, surgery	Advances in therapy	35	eng	12	2167	2175	10.1007/s12325-018-0834-6	INTRODUCTION: Identifying the parathyroid gland during surgery may be difficult for surgeons. It is critical for them to be able to locate it during thyroidectomy or parathyroidectomy because of the significant function of the parathyroid in the calcium balance. According to recent reports, intrinsic fluorescence of the parathyroid has been found. There is some evidence to suggest that new equipm…		1	8
70	JOUR	Prediction of hypocalcemia after total thyroidectomy using indocyanine green angiography of parathyroid glands: A simple quantitative scoring system.	GÃ¡lvez-Pastor, Silvia, Torregrosa, Nuria M, RÃ­os, Antonio, Febrero, Beatriz, GonzÃ¡lez-Costea, Rafael, GarcÃ­a-LÃ³pez, MarÃ­a A, Balsalobre, MarÃ­a D, Pastor-PÃ©rez, PatrÃ­cia, Moreno, Pablo, VÃ¡zquez-Rojas, JosÃ© L, RodrÃ­guez, JosÃ© M	2019/11//	Adult, Aged, Angiography, Coloring Agents, Female, Humans, Hypocalcemia, Indocyanine Green, Male, Middle Aged, Parathyroid Glands, Predictive Value of Tests, Thyroidectomy, adverse effects, blood supply, diagnostic imaging, etiology, methods	American journal of surgery	218	eng	5	993	999	10.1016/j.amjsurg.2018.12.074	BACKGROUND: Hypocalcemia is one of the most common complications after total thyroidectomy. Recently, indocyanine green (ICG) angiography of the parathyroid glands (PGs) has been suggested as a reliable tool for predicting postoperative hypocalcemia. The aim of our study was to evaluate the performance of a simple quantitative score based on ICG angiography of the PGs (4-ICG score) for predicting…		1	9
54	JOUR	[Intraoperative Indocyanine Green Fluorescence to Assure Vital Parathyroids in Thyroid Resections].	Karampinis, Ioannis, Di Meo, Giovanna, Gerken, Andreas, Stasiunaitis, Vytautas, Lammert, Alexander, Nowak, Kai	2018/08//	Adult, Female, Fluorescein Angiography, Fluorescent Dyes, Humans, Hypoparathyroidism, Indocyanine Green, Male, Middle Aged, Parathyroid Glands, Postoperative Complications, Prospective Studies, Surgery, Computer-Assisted, Thyroid Gland, Thyroidectomy, blood supply, diagnostic imaging, methods, prevention & control, surgery, therapeutic use	Zentralblatt fur Chirurgie	143	ger	4	380	384	10.1055/a-0655-7881	INTRODUCTION: Total thyreoidectomy is associated with high rates of temporary or permanent hypoparathyroidism. During surgery, ICG fluorescence angiography can be used to detect and preserve well vascularised parathyroid glands; this technique has been recently introduced in retrospective and prospective trials as an intraoperative technical support to avoid postoperative hypoparathyroidism. MATE…		1	10
133	JOUR	Indocyanine green fluorescence angiography for quantitative evaluation of in situ parathyroid gland perfusion and function after total thyroidectomy.	Lang, Brian Hung-Hin, Wong, Carlos K H, Hung, Hing Tsun, Wong, Kai Pun, Mak, Ka Lun, Au, Kin Bun	2017/01//	Adult, Cohort Studies, Evaluation Studies as Topic, Female, Fluorescein Angiography, Follow-Up Studies, Humans, Hyperthyroidism, Hypocalcemia, Hypoparathyroidism, Indocyanine Green, Male, Middle Aged, Monitoring, Intraoperative, Parathyroid Glands, Patient Safety, Postoperative Care, Predictive Value of Tests, Thyroidectomy, Time Factors, Treatment Outcome, adverse effects, diagnosis, diagnostic …	Surgery	161	eng	1	87	95	10.1016/j.surg.2016.03.037	BACKGROUND: Because the fluorescent light intensity on an indocyanine green fluorescence angiography reflects the blood perfusion within a focused area, the fluorescent light intensity in the remaining in situ parathyroid glands may predict postoperative hypocalcemia risk after total thyroidectomy. METHODS: Seventy patients underwent intraoperative indocyanine green fluorescence angiography after…		1	11
37	JOUR	Efficacy of indocyanine green fluorescence in predicting parathyroid vascularization during thyroid surgery.	Razavi, Alexander C, Ibraheem, Kareem, Haddad, Antoine, Saparova, Lachin, Shalaby, Hosam, Abdelgawad, Mohamed, Kandil, Emad	2019/09//	Adult, Angiography, Female, Fluorescence, Fluorescent Dyes, Humans, Hypocalcemia, Indocyanine Green, Male, Optical Imaging, Parathyroid Glands, Parathyroid Hormone, Postoperative Complications, Predictive Value of Tests, Retrospective Studies, Thyroidectomy, adverse effects, blood, blood supply, diagnostic imaging, epidemiology	Head & neck	41	eng	9	3276	3281	10.1002/hed.25837	BACKGROUND: We examined the value of indocyanine green (ICG) fluorescence angiography in predicting parathyroid vascularization following thyroid and central compartment surgeries. METHODS: Data were prospectively collected on adult patients undergoing thyroid and/or central compartment surgeries. Outcomes were compared in surgeries performed with and without ICG use. ICG scoring was used to quan…		1	12
86	JOUR	Do Near-Infrared Intra-Operative Findings Obtained Using Indocyanine Green Correlate with Post-Thyroidectomy Parathyroid Function? the Icgpredict Study.	Papavramidis, Theodosios S, Anagnostis, Panagiotis, Chorti, Angeliki, Pliakos, Ioannis, Panidis, Stavros, Koutsoumparis, Dimitris, Michalopoulos, Antonios	2020/09//	Humans, Hypoparathyroidism, Indocyanine Green, Parathyroid Glands, Parathyroid Hormone, Postoperative Complications, Prospective Studies, Thyroidectomy, adverse effects, diagnostic imaging, etiology, surgery	Endocrine practice : official journal of the American College of Endocrinology and the American Association of Clinical Endocrinologists	26	eng	9	967	973	10.4158/EP-2020-0119	OBJECTIVE: Postoperative hypoparathyroidism (hypoPT) still remains a significant complication after thyroidectomy. Intra-operative imaging modalities, such as near-infrared fluorescence using indocyanine green (ICG), may assist in identifying and preserving the parathyroid glands (PGs). The purpose of this study was to test the association between the intra-operative ICG staining scoring system a…		1	13
128	JOUR	Do near-infrared intra-operative findings by the use of indocyanine green correlate with post-thyroidectomy parathyroid function? - the ICGPREDICT study.	Papavramidis, Theodosios S, Anagnostis, Panagiotis, Chorti, Angeliki, Pliakos, Ioannis, Panidis, Stavros, Koutsoumparis, Dimitris, Michalopoulos, Antonios	2020/05//		Endocrine practice : official journal of the American College of Endocrinology and the American Association of Clinical Endocrinologists		eng				10.4158/EP-2020-0119	Objective: Post-operative hypoparathyroidism still remains a significant complication after thyroidectomy. Intraoperative imaging modalities, such as near infrared fluorescence by the use of indocyanine green (ICG), may assist to identify and preserve the parathyroid glands (PGs). The purpose of this study was to test the association between intra-operative ICG staining scoring system and 24-h po…		1	14
200	JOUR	Intraoperative Parathyroid Hormone Measurement vs Indocyanine Green Angiography of Parathyroid Glands in Prediction of Early Postthyroidectomy Hypocalcemia.	Llorente, Pablo Moreno, Francos MartÃ­nez, JosÃ© Manuel, Barrasa, Arantxa GarcÃ­a	2020/01//	Cohort Studies, Coloring Agents, Female, Fluorescein Angiography, Humans, Hypocalcemia, Indocyanine Green, Intraoperative Care, Male, Middle Aged, Parathyroid Glands, Parathyroid Hormone, Postoperative Complications, Thyroidectomy, adverse effects, blood, diagnosis, diagnostic imaging, etiology	JAMA surgery	155	eng	1	84	85	10.1001/jamasurg.2019.3652	This study compares the efficacy of intraoperative parathyroid hormone measurement vs indocyanine green angiography of parathyroid glands in predicting early postthyroidectomy hypocalcemia.		1	15
270	JOUR	Intraoperative indocyanine green (ICG) angiography of the parathyroids glands in prediction of post-thyroidectomy hypocalcemia: Diagnostic accuracy of the ICG score 2 versus the 4-ICG score.	Moreno Llorente, Pablo, GarcÃ­a Barrasa, Arantxa, Francos MartÃ­nez, JosÃ© Manuel, Alberich Prats, Marta, Pascua SolÃ©, Mireia	2021/06//		Cirugia espanola		eng				10.1016/j.cireng.2021.06.012	INTRODUCTION: Indocyanine green (ICG) angiography of the parathyroids is useful in prediction of postthyroidectomy hypocalcemia. We compared the diagnostic accuracy of a single-gland ICG score of 2 with a score estimated by adding the viability value of the four glands (4-ICG). METHODS: Fifty patients (66% women, median age 49.4 years) underwent total thyroidectomy with identification of all 4 gl…		1	16
271	JOUR	Intraoperative indocyanine green (ICG) angiography of the parathyroids glands in prediction of post-thyroidectomy hypocalcemia: Diagnostic accuracy of the ICG score 2 versus the 4-ICG score.	Moreno Llorente, Pablo, GarcÃ­a Barrasa, Arantxa, Francos MartÃ­nez, JosÃ© Manuel, Alberich Prats, Marta, Pascua SolÃ©, Mireia	2021/04//		Cirugia espanola		eng				10.1016/j.ciresp.2021.03.017	INTRODUCTION: Indocyanine green (ICG) angiography of the parathyroids is useful in prediction of postthyroidectomy hypocalcemia. We compared the diagnostic accuracy of a single-gland ICG score of 2 with a score estimated by adding the viability value of the four glands (4-ICG). METHODS: Fifty patients (66% women, median age 49.4 years) underwent total thyroidectomy with identification of all 4 gl…		1	17
25	JOUR	The feasibility of indocyanine green fluorescence imaging for identifying and assessing the perfusion of parathyroid glands during total thyroidectomy.	Zaidi, Nisar, Bucak, Emre, Yazici, Pinar, Soundararajan, Sarah, Okoh, Alexis, Yigitbas, Hakan, Dural, Cem, Berber, Eren	2016/06//	Adult, Feasibility Studies, Female, Fluorescent Dyes, Humans, Hypoparathyroidism, Indocyanine Green, Intraoperative Care, Male, Optical Imaging, Parathyroid Glands, Postoperative Complications, Prospective Studies, Thyroid Diseases, Thyroidectomy, blood supply, diagnosis, diagnostic imaging, etiology, methods, prevention & control, surgery	Journal of surgical oncology	113	eng	7	775	778	10.1002/jso.24237	BACKGROUND: There are limited adjuncts available for identifying and assessing the viability of parathyroid glands (PGs) during total thyroidectomy (TT). The aim of this study is to determine the feasibility of indocyanine green (ICG) imaging in identifying and assessing perfusion of PGs during TT. METHODS: ICG was administered in patients undergoing TT and fluorescence of PGs was assessed. A gra…		1	18
154	JOUR	The utility of indocyanine green near infrared fluorescent imaging in the identification of parathyroid glands during surgery for primary hyperparathyroidism.	Zaidi, Nisar, Bucak, Emre, Okoh, Alexis, Yazici, Pinar, Yigitbas, Hakan, Berber, Eren	2016/06//	Adult, Female, Fluorescent Dyes, Humans, Hyperparathyroidism, Primary, Indocyanine Green, Male, Middle Aged, Optical Imaging, Parathyroid Glands, Parathyroidectomy, Prospective Studies, Spectroscopy, Near-Infrared, Thyroid Gland, Treatment Outcome, diagnostic imaging, methods, surgery	Journal of surgical oncology	113	eng	7	771	774	10.1002/jso.24240	BACKGROUND AND OBJECTIVES: Intraoperative adjuncts for the localization of parathyroid glands in parathyroid surgery are limited. The aim of this study is to assess the usefulness of indocyanine green (ICG) near-infrared (NIR) fluorescent imaging in patients undergoing surgery for primary hyperparathyroidism (PHPT). METHODS: ICG imaging was performed in 33 patients undergoing parathyroidectomy (P…		1	19
76	JOUR	Feasibility of indocyanine green fluorescence imaging for intraoperative identification of parathyroid glands during thyroid surgery.	van den Bos, Jacqueline, van Kooten, Lottie, Engelen, Sanne M E, Lubbers, Tim, Stassen, Laurents P S, Bouvy, Nicole D	2019/02//	Adult, Aged, Coloring Agents, Feasibility Studies, Female, Humans, Indocyanine Green, Intraoperative Care, Male, Middle Aged, Optical Imaging, Parathyroid Glands, Prospective Studies, Thyroid Diseases, Thyroidectomy, blood supply, diagnostic imaging, surgery	Head & neck	41	eng	2	340	348	10.1002/hed.25451	BACKGROUND: This study assessed the feasibility of near-infrared fluorescence imaging with indocyanine green (ICG) to identify the parathyroid glands (PGs) intraoperatively and to assess their perfusion after thyroid resection. METHODS: Patients undergoing elective thyroidectomy were enrolled in this prospective study. An intravenous bolus of 7.5 mg ICG was administered twice: the first bolus to …		1	20
44	JOUR	Use of Indocyanine Green and Fluorescence Angiography in Parathyroid Surgery: A Feasibility Study.	Maser, Christina, Kohlbrenner, Amanda H, Dirks, Rachel	2020/12//		Surgical innovation	27	eng	6	587	593	10.1177/1553350620956437	Background. Indocyanine green (ICG) with near-infrared (NIR) fluorescence is an established method for assessing vascularity in various clinical settings. We hypothesized that parathyroid adenomas, with increased capillary networks, may demonstrate a fluorescence which could aid intraoperative identification and confirmation of the abnormal parathyroid tissue. Methods. This prospective case-contr…		1	21
35	JOUR	Intraoperative Near-Infrared Autofluorescence and Indocyanine Green Imaging to Identify Parathyroid Glands: A Comparison.	Lerchenberger, Max, Al Arabi, Norah, Gallwas, Julia K S, Stepp, Herbert, Hallfeldt, Klaus K J, Ladurner, Roland	2019///		International journal of endocrinology	2019	eng		4687951	4687951	10.1155/2019/4687951	OBJECTIVE: To investigate the feasibility of near-infrared autofluorescence (AF) and indocyanine green (ICG) fluorescence to identify parathyroid glands intraoperatively. METHODS: Fluorescence imaging was carried out during open parathyroid and thyroid surgery. After visual identification, parathyroid glands were exposed to near-infrared (NIR) light with a wavelength between 690 and 770ânm. The…		1	22
222	JOUR	Near-Infrared Autofluorescence Imaging May Reduce Temporary Hypoparathyroidism in Patients Undergoing Total Thyroidectomy and Central Neck Dissection.	Kim, Do Hun, Kim, Sung Won, Kang, Pureum, Choi, Jonghyun, Lee, Hyoung Shin, Park, Sung Yool, Kim, Yikeun, Ahn, Yeh-Chan, Lee, Kang Dae	2021/06//		Thyroid : official journal of the American Thyroid Association		eng				10.1089/thy.2021.0056	Background: Near-infrared autofluorescence (NIRAF) imaging is known to reduce the incidence of post-thyroidectomy hypocalcemia. However, there are no studies on how much NIRAF imaging affects the serum parathyroid hormone (PTH) level after surgery. We investigated the changes of the serum PTH level and ionized calcium (iCa.) in patients undergoing total thyroidectomy with central neck dissection …		1	23
17	JOUR	Cutting Edge in Thyroid Surgery: Autofluorescence of Parathyroid Glands.	Falco, Jorge, Dip, Fernando, Quadri, Pablo, de la Fuente, Martin, Rosenthal, Raul	2016/08//	Adult, Female, Humans, Intraoperative Care, Male, Middle Aged, Optical Imaging, Outcome Assessment, Health Care, Parathyroid Glands, Parathyroidectomy, Spectroscopy, Near-Infrared, Thyroidectomy, diagnostic imaging, methods, surgery	Journal of the American College of Surgeons	223	eng	2	374	380	10.1016/j.jamcollsurg.2016.04.049	BACKGROUND: Identification of parathyroid glands may be challenging during thyroid and parathyroid surgery. Accidental resection of the glands may increase the morbidity of the surgery. The aim of this study was to evaluate accuracy in identification of autofluorescent parathyroid glands with the use of near infrared light in real time. STUDY DESIGN: Patients undergoing thyroid and parathyroid su…		1	24
198	JOUR	Impact of autofluorescence-based identification of parathyroids during total thyroidectomy on postoperative hypocalcemia: a before and after controlled study.	Benmiloud, Fares, Rebaudet, Stanislas, Varoquaux, Arthur, Penaranda, Guillaume, Bannier, Marie, Denizot, Anne	2018/01//	Adult, Aged, Controlled Before-After Studies, Female, Humans, Hypocalcemia, Male, Middle Aged, Optical Imaging, Parathyroid Glands, Postoperative Complications, Thyroidectomy, Transplantation, Autologous, adverse effects, diagnostic imaging, etiology, instrumentation, prevention & control	Surgery	163	eng	1	23	30	10.1016/j.surg.2017.06.022	BACKGROUND: The clinical impact of intraoperative autofluorescence-based identification of parathyroids using a near-infrared camera remains unknown. METHODS: In a before and after controlled study, we compared all patients who underwent total thyroidectomy by the same surgeon during Period 1 (January 2015 to January 2016) without near-infrared (near-infrared- group) and those operated on during …		1	25
56	JOUR	Intraoperative Parathyroid Autofluorescence Detection in Patients with Primary Hyperparathyroidism.	Squires, Malcolm H, Jarvis, Rachel, Shirley, Lawrence A, Phay, John E	2019/04//	Aged, Feasibility Studies, Female, Follow-Up Studies, Humans, Hyperparathyroidism, Primary, Intraoperative Care, Male, Middle Aged, Optical Imaging, Parathyroid Glands, Parathyroidectomy, Prognosis, Prospective Studies, Spectroscopy, Near-Infrared, Surgery, Computer-Assisted, diagnostic imaging, methods, surgery	Annals of surgical oncology	26	eng	4	1142	1148	10.1245/s10434-019-07161-w	BACKGROUND: Intrinsic near-infrared (NIR) autofluorescence of the parathyroid gland may improve intraoperative gland identification without the need for contrast agent injection. Compared with patients undergoing surgery for thyroid disease, identification of pathologic parathyroid tissue in patients with hyperparathyroidism is essential. This study analyzed the utility of a novel real-time autof…		1	26
296	JOUR	The effect of intraoperative autofluorescence monitoring on unintentional parathyroid gland excision rates and postoperative PTH concentrations-a single-blind randomized-controlled trial.	Papavramidis, Theodosios S, Chorti, Angeliki, Tzikos, George, Anagnostis, Panagiotis, Pantelidis, Pantelis, Pliakos, Ioannis, Panidis, Stavros, Papaioannou, Maria, Bakkar, Sohail, Unal, Ethem, Michalopoulos, Antonios	2021/05//	Adult, Humans, Hypocalcemia, Parathyroid Glands, Parathyroid Hormone, Parathyroidectomy, Postoperative Complications, Single-Blind Method, Thyroid Gland, Thyroidectomy, adverse effects, diagnostic imaging, surgery	Endocrine	72	eng	2	546	552	10.1007/s12020-020-02599-5	PURPOSE: Intraoperative imaging of parathyroid glands (PGs) has been developed in order to reduce the risk of unintentional parathyroidectomy during total thyroidectomy. This novel modality is based on their intrinsic characteristic of autofluorescence (AF) after near-infrared light exposure. The aim of this study was to assess the effect of this method on the risk of unintentional PG excision (t…		1	27
20	JOUR	Intraoperative near-infrared autofluorescence imaging of parathyroid glands.	Ladurner, Roland, Sommerey, Sandra, Arabi, Nora Al, Hallfeldt, Klaus K J, Stepp, Herbert, Gallwas, Julia K S	2017/08//	Adenoma, Endoscopy, Fluorescence, Humans, Indocyanine Green, Intraoperative Care, Lymph Nodes, Optical Imaging, Parathyroid Glands, Parathyroid Neoplasms, Prospective Studies, Thyroid Gland, diagnostic imaging, methods, surgery	Surgical endoscopy	31	eng	8	3140	3145	10.1007/s00464-016-5338-3	OBJECTIVE: To identify parathyroid glands intraoperatively by exposing their autofluorescence using near-infrared light. METHODS: Fluorescence imaging was carried out during minimally invasive and open parathyroid and thyroid surgery. After identification, the parathyroid glands as well as the surrounding tissue were exposed to near-infrared (NIR) light with a wavelength of 690-770Â nm using a mo…		1	28
61	JOUR	Feasibility of Autofluorescence for Parathyroid Glands During Thyroid Surgery and the Risk of Hypocalcemia: First Results in Belgium and Review of the Literature.	Van Slycke, Sam, Van Den Heede, Klaas, Brusselaers, Nele, Vermeersch, Hubert	2020/12//		Surgical innovation		eng		1553350620980263	1553350620980263	10.1177/1553350620980263	Background. Post-operative hypocalcemia remains the most frequent complication after total thyroidectomy. Recently, autofluorescence imaging was introduced to detect parathyroid glands early during dissection. Aim. We aimed to check the feasibility of autofluorescence regarding the number of parathyroid glands visualised and the risk of post-operative hypocalcemia. Methods. In a prospectively gat…		1	29
73	JOUR	Near-infrared autofluorescence imaging to detect parathyroid glands in thyroid surgery.	Ladurner, R, Al Arabi, N, Guendogar, U, Hallfeldt, Kkj, Stepp, H, Gallwas, Jks	2018/01//	Cohort Studies, Humans, Optical Imaging, Parathyroid Glands, Spectroscopy, Near-Infrared, Thyroid Gland, Thyroidectomy, diagnostic imaging, methods, surgery	Annals of the Royal College of Surgeons of England	100	eng	1	33	36	10.1308/rcsann.2017.0102	Objective To identify and save parathyroid glands during thyroidectomy by displaying their autofluorescence. Methods Autofluorescence imaging was carried out during thyroidectomy with and without central lymph node dissection. After visual recognition by the surgeon, the parathyroid glands and the surrounding tissue were exposed to near-infrared light with a wavelength of 690-770Â nm using a modi…		1	30
46	JOUR	Parathyroid Autofluorescence-How Does It Affect Parathyroid and Thyroid Surgery? A 5 Year Experience.	Ladurner, Roland, Lerchenberger, Maximilian, Al Arabi, Norah, Gallwas, Julia K S, Stepp, Herbert, Hallfeldt, Klaus K J	2019/07//	Humans, Intraoperative Care, Optical Imaging, Parathyroid Glands, Parathyroidectomy, Spectroscopy, Near-Infrared, Thyroid Gland, Thyroidectomy, diagnostic imaging, surgery	Molecules (Basel, Switzerland)	24	eng	14			10.3390/molecules24142560	Injury to parathyroid glands during thyroid and parathyroid surgery is common and postoperative hypoparathyroidism represents a serious complication. Parathyroid glands possess a unique autofluorescence in the near-infrared spectrum which could be used for their identification and protection at an early stage of the operation. In the present study parathyroid autofluorescence was visualized intra…		1	31
30	JOUR	Autofluorescence imaging of parathyroid glands: An assessment of potential indications.	Kose, Emin, Rudin, Anatoliy V, Kahramangil, Bora, Moore, Edwina, Aydin, Husnu, Donmez, Mustafa, Krishnamurthy, Vikram, Siperstein, Allan, Berber, Eren	2020/01//	Adult, Aged, Female, Humans, Hypoparathyroidism, Intraoperative Care, Male, Middle Aged, Optical Imaging, Parathyroid Glands, Parathyroidectomy, Postoperative Complications, Predictive Value of Tests, Prospective Studies, Sensitivity and Specificity, Thyroid Gland, Thyroidectomy, adverse effects, diagnostic imaging, etiology, methods, pathology, prevention & control, surgery	Surgery	167	eng	1	173	179	10.1016/j.surg.2019.04.072	BACKGROUND: The aim of this study was to determine both the accuracy of near infrared fluorescence imaging to detect parathyroid glands and the potential indications of near infrared fluorescence imaging in thyroid and parathyroid surgery by correlating the autofluorescence signature with the pathologic specimen. METHODS: This was an institutional review board-approved, prospective study of patie…		1	32
93	JOUR	Randomized Controlled Trial Comparing White Light with Near-Infrared Autofluorescence for Parathyroid Gland Identification During Total Thyroidectomy.	Dip, Fernando, Falco, Jorge, Verna, Silvina, Prunello, Marcos, Loccisano, Matias, Quadri, Pablo, White, Kevin, Rosenthal, Raul	2019/05//	Female, Fluorescence, Humans, Hypocalcemia, Incidence, Male, Middle Aged, Optical Imaging, Parathyroid Glands, Postoperative Complications, Prospective Studies, Spectroscopy, Near-Infrared, Thyroidectomy, diagnostic imaging, epidemiology, methods, prevention & control	Journal of the American College of Surgeons	228	eng	5	744	751	10.1016/j.jamcollsurg.2018.12.044	BACKGROUND: Parathyroid glands are difficult to identify during total thyroidectomies, and accidental resection can lead to problematic postoperative hypocalcemia. Our main goals were to evaluate the effectiveness of using near-infrared light (NIRL) autofluorescence intraoperatively for parathyroid gland identification and to measure its impact on postoperative hypocalcemia incidence. STUDY DESIG…		1	33
211	JOUR	Label-free intraoperative parathyroid localization with near-infrared autofluorescence imaging.	McWade, Melanie A, Paras, Constantine, White, Lisa M, Phay, John E, SolÃ³rzano, Carmen C, Broome, James T, Mahadevan-Jansen, Anita	2014/12//	Adult, Aged, Animals, Computer Systems, Diagnostic Imaging, Dogs, Endocrine Surgical Procedures, Female, Fluorescence, Fluorescent Dyes, Humans, Male, Middle Aged, Parathyroid Diseases, Parathyroid Glands, Parathyroidectomy, Pilot Projects, Reproducibility of Results, Spectroscopy, Near-Infrared, Thyroid Diseases, Thyroidectomy, anatomy & histology, methods, pathology, surgery	The Journal of clinical endocrinology and metabolism	99	eng	12	4574	4580	10.1210/jc.2014-2503	CONTEXT: The inability to accurately localize the parathyroid glands during parathyroidectomy and thyroidectomy procedures can prevent patients from achieving postoperative normocalcemia. There is a critical need for an improved intraoperative method for real-time parathyroid identification. OBJECTIVE: The objective of the study was to test the accuracy of a real-time, label-free technique that u…		1	34
157	JOUR	Near-Infrared Autofluorescence Image-Guided Parathyroid Gland Mapping in Thyroidectomy.	Kim, Sung Won, Lee, Hyoung Shin, Ahn, Yeh-Chan, Park, Chan Woo, Jeon, Seok Won, Kim, Chang Hoi, Ko, Jae Beom, Oak, Chulho, Kim, Yikeun, Lee, Kang Dae	2018/02//	Adult, Aged, Feasibility Studies, Female, Humans, Hypoparathyroidism, Infrared Rays, Male, Middle Aged, Optical Imaging, Parathyroid Glands, Thyroid Cancer, Papillary, Thyroid Neoplasms, Thyroidectomy, Young Adult, adverse effects, diagnostic imaging, etiology, injuries, methods, prevention & control, surgery	Journal of the American College of Surgeons	226	eng	2	165	172	10.1016/j.jamcollsurg.2017.10.015	BACKGROUND: Studies to date have shown that near-infrared autofluorescence imaging (NIR) can detect the parathyroid gland during thyroidectomy. However, there are no reports that NIR imaging can identify the parathyroid gland when it's covered with fibrofatty tissue before identification by a surgeon's naked eye. In this study, we investigated the feasibility of parathyroid gland mapping to facil…		1	35
156	JOUR	Increased identification of parathyroid glands using near infrared light during thyroid and parathyroid surgery.	Falco, Jorge, Dip, Fernando, Quadri, Pablo, de la Fuente, Martin, Prunello, Marcos, Rosenthal, RaÃºl J	2017/09//	Adult, Female, Humans, Intraoperative Period, Male, Middle Aged, Neck, Parathyroid Glands, Parathyroidectomy, Retrospective Studies, Spectroscopy, Near-Infrared, Thyroid Gland, Thyroidectomy, Treatment Outcome, diagnostic imaging, methods, surgery	Surgical endoscopy	31	eng	9	3737	3742	10.1007/s00464-017-5424-1	BACKGROUND: Parathyroid gland (PG) identification during thyroid and parathyroid surgery is challenging. Accidental parathyroidectomy increases the rate of postoperative hypocalcaemia. Recently, autofluorescence with near infrared light (NIRL) has been described for PG visualization. The aim of this study is to analyze the increased rate of visualization of PGs with the use of NIRL compared to wh…		1	36
204	JOUR	Spare Parathyroid Glands During Thyroid Surgery with Perioperative Autofluorescence Imaging: A Diagnostic Study.	Bellier, Alexandre, Wazne, Yann, Chollier, Thibaut, Sturm, Nathalie, Chaffanjon, Philippe	2021/04//		World journal of surgery		eng				10.1007/s00268-021-06102-7	BACKGROUND: The aim of this original study was to determine the number of parathyroid glands that can be saved and reimplanted thanks to autofluorescence during thyroid surgery. Preservation of parathyroid function remains challenging during thyroid surgery. The parathyroid glands must be identified and immediately autotransplanted in the case of devascularization. Near-infrared autofluorescence …		1	37
67	JOUR	The impact of near infrared fluorescence imaging on parathyroid function after total thyroidectomy.	Kim, Yoo Seok, Erten, Ozgun, Kahramangil, Bora, Aydin, Husnu, Donmez, Mustafa, Berber, Eren	2020/10//	Calcium, Female, Goiter, Graves Disease, Humans, Hypocalcemia, Male, Middle Aged, Optical Imaging, Parathyroid Glands, Parathyroidectomy, Retrospective Studies, Thyroid Neoplasms, Thyroidectomy, adverse effects, blood, diagnostic imaging, etiology, methods, physiology, surgery	Journal of surgical oncology	122	eng	5	973	979	10.1002/jso.26098	BACKGROUND: Compared withÂ conventional thyroidectomy, hypocalcemia rate was reported to be lower after total thyroidectomy (TT) utilizing near infrared fluorescence imaging (NIFI). The aim of this study is to evaluate the impact of NIFI on postoperative parathyroid function after TT. METHODS: This was a retrospective institutional review board-approved study comparing 100 patients who underwent …		1	38
82	JOUR	Identification of inadvertently removed parathyroid glands during thyroid surgery using autofluorescence.	Serra, Carlos, Silveira, LuÃ­s, Canudo, AntÃ³nio	2020/08//		Gland surgery	9	eng	4	893	898	10.21037/gs-20-163	BACKGROUND: Incidental excision of parathyroid glands is a common event during thyroid surgery and in spite the divergent results that can be obtained from the literature about its clinical significance, all efforts must be used to their preservation. Due to the autofluorescence emitted by parathyroid glands, authors began to use a custom device to inspect thyroidectomy specimens for incidentally…		1	39
45	JOUR	Does fluoroscopy prevent inadvertent parathyroidectomy in thyroid surgery?	DiMarco, A, Chotalia, R, Bloxham, R, McIntyre, C, Tolley, N, Palazzo, F F	2019/09//	Adult, Feasibility Studies, Female, Fluoroscopy, Humans, Hypocalcemia, Hypoparathyroidism, Incidence, Intraoperative Complications, Male, Middle Aged, Optical Imaging, Parathyroid Glands, Prospective Studies, Thyroid Gland, Thyroidectomy, Transplantation, Autologous, adverse effects, diagnostic imaging, epidemiology, etiology, injuries, methods, prevention & control, surgery, transplantation	Annals of the Royal College of Surgeons of England	101	eng	7	508	513	10.1308/rcsann.2019.0065	INTRODUCTION: Near-infrared imaging may facilitate intraoperative identification of parathyroid glands by causing autofluorescence but its clinical value has not been established. Inadvertent parathyroidectomy occurs in 5-22% of thyroidectomies and is associated with temporary and permanent hypoparathyroidism. The aim of this study was to determine whether near-infrared imaging prevents inadverte…		1	40
3	JOUR	Intraoperative localization of the parathyroid glands with indocyanine green and Firefly(R) technology during BABA robotic thyroidectomy.	Yu, Hyeong Won, Chung, Joon Woo, Yi, Jin Wook, Song, Ra-Yeong, Lee, Joon-Hyop, Kwon, Hyungju, Kim, Su-Jin, Chai, Young Jun, Choi, June Young, Lee, Kyu Eun	2017/07//	Adult, Carcinoma, Papillary, Case-Control Studies, Female, Humans, Indocyanine Green, Male, Middle Aged, Parathyroid Glands, Parathyroidectomy, Postoperative Complications, Propensity Score, Prospective Studies, Robotic Surgical Procedures, Thyroid Cancer, Papillary, Thyroid Neoplasms, Young Adult, diagnostic imaging, methods, surgery	Surgical endoscopy	31	eng	7	3020	3027	10.1007/s00464-016-5330-y	BACKGROUND: It is unclear whether near-infrared (NIR) light-induced indocyanine green (ICG) fluorescence can effectively identify, and thus permit the preservation of, parathyroid glands in bilateral axillo-breast approach (BABA) robotic thyroidectomy. This case-control study with a prospectively recruited consecutive series and a retrospectively selected control group assessed the usefulness of …		1	41
407	GEN	In Reference to Near-Infrared Fluorescence Imaging in the Identification of Parathyroid Glands in Thyroidectomy.	Wang, Bin, Zhu, Chun-Rong, Wu, Jian	2021/05//	Humans, Optical Imaging, Parathyroid Glands, Parathyroidectomy, Thyroidectomy, diagnostic imaging, surgery	The Laryngoscope	131	eng	5	E1748	E1748	10.1002/lary.29411			1	42
196	JOUR	Intraoperative Real-Time Localization of Normal Parathyroid Glands With Autofluorescence Imaging.	Kim, Sung Won, Song, Seo Hyun, Lee, Hyoung Shin, Noh, Woong Jae, Oak, Chulho, Ahn, Yeh-Chan, Lee, Kang Dae	2016/12//	Adult, Aged, Carcinoma, Carcinoma, Papillary, Feasibility Studies, Female, Humans, Male, Middle Aged, Optical Imaging, Parathyroid Glands, Thyroid Cancer, Papillary, Thyroid Neoplasms, Thyroidectomy, diagnostic imaging, methods, surgery	The Journal of clinical endocrinology and metabolism	101	eng	12	4646	4652	10.1210/jc.2016-2558	CONTEXT: This biomedical investigation is valuable for identification and localization of parathyroid glands during thyroidectomy, which can provide an intraoperative real-time visual guidance. OBJECTIVE: The objective of the study was to investigate the feasibility of real-time autofluorescence imaging of the parathyroid glands without exogenous contrast dye for their localization and demonstrat…		1	43
22	JOUR	Intraoperative Near-infrared Imaging for Parathyroid Gland Identification by Auto-fluorescence: A Feasibility Study.	De Leeuw, Frederic, Breuskin, Ingrid, Abbaci, Muriel, Casiraghi, Odile, Mirghani, HaÃ¯tham, Ben Lakhdar, AÃ¯cha, Laplace-BuilhÃ©, Corinne, Hartl, Dana	2016/09//	Feasibility Studies, Female, Fluorescence, Humans, Male, Middle Aged, Monitoring, Intraoperative, Parathyroid Glands, Prospective Studies, Spectroscopy, Near-Infrared, Thyroidectomy, adverse effects, diagnostic imaging, methods	World journal of surgery	40	eng	9	2131	2138	10.1007/s00268-016-3571-5	BACKGROUND: Parathyroid glands (PGs) can be particularly hard to distinguish from surrounding tissue and thus can be damaged or removed during thyroidectomy. Postoperative hypoparathyroidism is the most common complication after thyroidectomy. Very recently, it has been found that the parathyroid tissue shows near-infrared (NIR) auto-fluorescence which could be used for intraoperative detection, …		1	44
207	JOUR	Near-infrared autofluorescence for the detection of parathyroid glands.	Paras, Constantine, Keller, Matthew, White, Lisa, Phay, John, Mahadevan-Jansen, Anita	2011/06//	Adipose Tissue, Humans, Image Processing, Computer-Assisted, Parathyroid Glands, Parathyroidectomy, Spectrometry, Fluorescence, Spectroscopy, Near-Infrared, Surgery, Computer-Assisted, Thyroid Diseases, Thyroidectomy, Trachea, chemistry, methods, surgery	Journal of biomedical optics	16	eng	6	67012	67012	10.1117/1.3583571	A major challenge in endocrine surgery is the intraoperative detection of parathyroid glands during both thyroidectomies and parathyroidectomies. Current localization techniques such as ultrasound and sestamibi scan are mostly preoperative and rely on an abnormal parathyroid for its detection. In this paper, we present near-infrared (NIR) autofluorescence as a nonintrusive, real-time, automated i…		1	45
231	JOUR	A novel optical approach to intraoperative detection of parathyroid glands.	McWade, Melanie A, Paras, Constantine, White, Lisa M, Phay, John E, Mahadevan-Jansen, Anita, Broome, James T	2013/12//	Humans, Intraoperative Period, Optical Devices, Optical Phenomena, Parathyroid Diseases, Parathyroid Glands, Parathyroidectomy, Spectrometry, Fluorescence, Spectroscopy, Near-Infrared, Thyroid Diseases, Thyroidectomy, instrumentation, methods, pathology, surgery	Surgery	154	eng	6	1371	7; discussion 1377	10.1016/j.surg.2013.06.046	BACKGROUND: Inadvertent removal of parathyroid glands is a challenge in endocrine operations. There is a critical need for a diagnostic tool that provides sensitive, real-time parathyroid detection during procedures. We have developed an intraoperative technique using near-infrared (NIR) fluorescence for inÂ vivo, real-time detection of the parathyroid regardless of its pathologic state. METHODS:…		1	46
99	JOUR	Near-infrared auto-fluorescence spectroscopy combining with Fisher's linear discriminant analysis improves intraoperative real-time identification of normal parathyroid in thyroidectomy.	Liu, Junsong, Wang, Xiaoxia, Wang, Rui, Xu, Chongwen, Zhao, Ruimin, Li, Honghui, Zhang, Shaoqiang, Yao, Xiaobao	2020/01//	Adult, Aged, Discriminant Analysis, Female, Humans, Intraoperative Period, Male, Middle Aged, Parathyroid Glands, ROC Curve, Spectrometry, Fluorescence, Spectroscopy, Near-Infrared, Surgery, Computer-Assisted, Thyroid Gland, Thyroid Neoplasms, Thyroidectomy, diagnosis, diagnostic imaging, methods, surgery	BMC surgery	20	eng	1	4	4	10.1186/s12893-019-0670-x	BACKGROUND: To evaluate the efficacy of a sensitive, real-time tool for identification and protection for parathyroid glands during thyroidectomy. METHODS: Near-infrared (NIR) auto-fluorescence was measured intraoperatively from 20 patients undergoing thyroidectomy. Spectra were measured from suspicious parathyroid glands and surrounding neck tissues during the operation with a NIR fluorescence s…		1	47
216	JOUR	Establishing the clinical utility of autofluorescence spectroscopy for parathyroid detection.	McWade, Melanie A, Sanders, Melinda E, Broome, James T, SolÃ³rzano, Carmen C, Mahadevan-Jansen, Anita	2016/01//	Adult, Aged, Aged, 80 and over, Female, Humans, Male, Middle Aged, Optical Imaging, Parathyroid Diseases, Parathyroid Glands, Parathyroidectomy, Spectroscopy, Near-Infrared, Thyroid Diseases, Thyroidectomy, Young Adult, surgery	Surgery	159	eng	1	193	202	10.1016/j.surg.2015.06.047	BACKGROUND: The inability of surgeons to identify parathyroid glands accurately during cervical endocrine surgery hinders patients from achieving postoperative normocalcemia. An intrinsic, near-infrared fluorescence method was developed for real-time parathyroid identification with high accuracy. This study assesses the clinical utility of this approach. METHODS: Autofluorescence measurements wer…		1	48
95	JOUR	Enhanced visualization of parathyroid glands during video-assisted neck surgery.	Alesina, P F, Meier, B, Hinrichs, J, Mohmand, W, Walz, M K	2018/05//	Aged, Female, Follow-Up Studies, Humans, Hyperparathyroidism, Hyperthyroidism, Image Enhancement, Indocyanine Green, Male, Middle Aged, Monitoring, Intraoperative, Parathyroid Glands, Parathyroidectomy, Prospective Studies, Sampling Studies, Spectroscopy, Near-Infrared, Thyroidectomy, Treatment Outcome, Video-Assisted Surgery, diagnostic imaging, methods, surgery	Langenbeck's archives of surgery	403	eng	3	395	401	10.1007/s00423-018-1665-2	PURPOSE: Visualization and precise dissection of the parathyroid glands are a crucial step of thyroidectomy. Moreover, identification of parathyroid adenoma in patients with primary hyperparathyroidism can be challenging due to the possible abnormal location of the enlarged parathyroid. Near-infrared fluorescence (NIR) can be adopted during video-assisted neck surgery in addition to standard endo…		1	49
143	JOUR	Intraoperative Identification of the Parathyroid Gland with a Fluorescence Detection System.	Shinden, Yoshiaki, Nakajo, Akihiro, Arima, Hideo, Tanoue, Kiyonori, Hirata, Munetsugu, Kijima, Yuko, Maemura, Kosei, Natsugoe, Shoji	2017/06//	Adult, Aged, Female, Fluorescence, Humans, Male, Middle Aged, Parathyroid Diseases, Parathyroid Glands, Thyroid Diseases, diagnostic imaging, surgery	World journal of surgery	41	eng	6	1506	1512	10.1007/s00268-017-3903-0	BACKGROUND: Intraoperative identification of the difficult-to-spot parathyroid gland is critical during surgery for thyroid and parathyroid disease. Recently, intrinsic fluorescence of the parathyroid gland was identified, and a new method was developed for intraoperative detection of the parathyroid with an original fluorescent detection apparatus. Here, we describe a method for intraoperative d…		1	50
40	JOUR	Indocyanine green fluorescence angiography-guided transoral endoscopic thyroidectomy and parathyroidectomy: First clinical report.	Turan, Mehmet Ilker, Celik, Mehmet, ErtÃ¼rk, Mehmet Sercan	2020/12//	Fluorescein Angiography, Fluorescence, Humans, Indocyanine Green, Parathyroidectomy, Photochemotherapy, Photosensitizing Agents, Thyroidectomy, methods	Photodiagnosis and photodynamic therapy	32	eng		102028	102028	10.1016/j.pdpdt.2020.102028	BACKGROUND: Indocyanine green fluorescence (ICG) angiography has been used for many purposes including as part of a focused parathyroidectomy technique. Concomitant fluorescence of thyroid tissue may cause challenges defining parathyroid tissue during surgery, since ICG is not a selective fluorescent agent. On the other hand, cosmesis is still a big problem for patients due to the visible neck sc…		1	51
170	JOUR	Total thyroidectomy with intraoperative neural monitoring and near-infrared fluorescence imaging.	Barbieri, Diego, Triponez, FrÃ©dÃ©ric, Indelicato, Pietro, Vinciguerra, Alessandro, Trimarchi, Matteo, Bussi, Mario	2021/07//		Langenbeck's archives of surgery		eng				10.1007/s00423-021-02228-3	PURPOSE: To describe our personal experience during aclassic complete thyroidectomy adopting both intraoperative neural monitoringand near-infrared autofluorescence. METHODS: In October 2021, 20 patients underwent totalthyroidectomy for benign and malignant conditions: 13 patients were affected bymultinodular goiter, 2 by Graves' disease, and 5 by indeterminate lesions (3Tir-3B and 2 Tir-3A). For…		1	52
113	JOUR	Intraoperative Assessment of Parathyroid Viability using Laser Speckle Contrast Imaging.	Mannoh, E A, Thomas, G, SolÃ³rzano, C C, Mahadevan-Jansen, A	2017/11//	Female, Humans, Hypoparathyroidism, Male, Parathyroid Glands, Parathyroidectomy, diagnostic imaging, surgery	Scientific reports	7	eng	1	14798	14798	10.1038/s41598-017-14941-5	Post-surgical hypoparathyroidism and hypocalcemia are known to occur after nearly 50% of all thyroid surgeries as a result of accidental disruption of blood supply to healthy parathyroid glands, which are responsible for regulating calcium. However, there are currently no clinical methods for accurately identifying compromised glands and the surgeon relies on visual assessment alone to determine …		1	53
333	JOUR	Intraoperative Mapping of Parathyroid Glands Using Fluorescence Lifetime Imaging.	Marsden, Mark, Weaver, Shamira Sridharan, Marcu, Laura, Campbell, Michael J	2021/09//		The Journal of surgical research	265	eng		42	48	10.1016/j.jss.2021.03.023	BACKGROUND: Hypoparathyroidism is a common complication following thyroidectomy. There is a need for technology to aid surgeons in identifying the parathyroid glands. In contrast to near infrared technologies, fluorescence lifetime imaging (FLIm) is not affected by ambient light and may be valuable in identifying parathyroid tissue, but has never been evaluated in this capacity. METHODS: We used …		1	54
52	JOUR	Evaluation of Parathyroid Glands with Indocyanine Green Fluorescence Angiography After Thyroidectomy.	Rudin, Anatoliy V, McKenzie, Travis J, Thompson, Geoffrey B, Farley, David R, Lyden, Melanie L	2019/06//	Case-Control Studies, Coloring Agents, Female, Fluorescein Angiography, Humans, Indocyanine Green, Male, Middle Aged, Parathyroid Glands, Parathyroid Hormone, Retrospective Studies, Thyroidectomy, Transplantation, Autologous, blood, diagnostic imaging, statistics & numerical data, transplantation	World journal of surgery	43	eng	6	1538	1543	10.1007/s00268-019-04909-z	BACKGROUND: Indocyanine green fluorescence angiography (ICGA) is a new adjunct that has been used in surgical procedures to assess blood flow. This study evaluated the utility of ICGA compared to visual inspection to predict parathyroid function, guide autotransplantation and potentially decrease permanent hypoparathyroidism. METHODS: This was a retrospective study of patients who underwent total…		1	55
57	JOUR	Near-Infrared Fluorescence Imaging in the Identification of Parathyroid Glands in Thyroidectomy.	Takahashi, Takeshi, Yamazaki, Keisuke, Ota, Hisayuki, Shodo, Ryusuke, Ueki, Yushi, Horii, Arata	2021/05//	Aged, Blood Loss, Surgical, Feasibility Studies, Female, Fluorescence, Humans, Intraoperative Care, Intraoperative Complications, Male, Middle Aged, Optical Imaging, Parathyroid Glands, Postoperative Complications, Predictive Value of Tests, Prospective Studies, Thyroid Diseases, Thyroidectomy, adverse effects, diagnosis, diagnostic imaging, etiology, injuries, methods, prevention & control, surg…	The Laryngoscope	131	eng	5	1188	1193	10.1002/lary.29163	OBJECTIVES/HYPOTHESIS: To assess the ability of near-infrared fluorescence imaging (NIFI) to identify parathyroid glands (PGs) among histologically proven PG/non-PG specimens compared with a surgeon's visual acumen, and to determine NIFI sensitivity in detecting incidentally resected PGs from thyroidectomy specimens, compared to the surgeon's visual inspection. STUDY DESIGN: Prospective study. ME…		1	56
114	JOUR	Detection of Parathyroid Autofluorescence Using Near-Infrared Imaging: A Multicenter Analysis of Concordance Between Different Surgeons.	Kahramangil, Bora, Dip, Fernando, Benmiloud, Fares, Falco, Jorge, de La Fuente, Martin, Verna, Silvina, Rosenthal, Raul, Berber, Eren	2018/04//	Female, Follow-Up Studies, Humans, Hyperparathyroidism, Primary, Hyperthyroidism, Male, Middle Aged, Observer Variation, Optical Imaging, Parathyroid Glands, Parathyroidectomy, Prognosis, Retrospective Studies, Spectroscopy, Near-Infrared, Surgeons, Thyroid Neoplasms, Thyroid Nodule, Thyroidectomy, diagnostic imaging, methods, pathology, standards, surgery	Annals of surgical oncology	25	eng	4	957	962	10.1245/s10434-018-6364-2	BACKGROUND: Parathyroid glands (PGs) exhibit autofluorescence (AF) when excited by near-infrared laser. This multicenter study aims to analyze how this imaging could facilitate the detection of PGs during thyroidectomy and parathyroidectomy procedures. METHODS: This was a retrospective Institutional Review Board-approved analysis of prospectively collected data at three centers. Near-infrared flu…		1	57
297	JOUR	Can near-infrared autofluorescence imaging be used for intraoperative confirmation of parathyroid tissue?	Berber, Eren, Akbulut, Serkan	2021/07//		Journal of surgical oncology		eng				10.1002/jso.26603	BACKGROUND AND OBJECTIVES: Whether ex vivo autofluorescence (AF) imaging findings could be quantified to intraoperatively differentiate parathyroid tissue has not been reported. Our aim was to assess the ability of AF imaging to confirm parathyroid tissue during thyroidectomy and parathyroidectomy procedures. METHODS: This was a retrospective Institutional Review Board-approved study. AF signals …		1	58
436	JOUR	Comparing intraoperative parathyroid identification based on surgeon experience versus near infrared autofluorescence detection - A surgeon-blinded multi-centric study.	Thomas, Giju, SolÃ³rzano, Carmen C, Baregamian, Naira, Mannoh, Emmanuel A, Gautam, Rekha, Irlmeier, Rebecca T, Ye, Fei, Nelson, Jon A, Long, Samuel E, Gauger, Paul G, Magner, Alexa, Metcalf, Tyler, Shirley, Lawrence A, Phay, John E, Mahadevan-Jansen, Anita	2021/05//		American journal of surgery		eng				10.1016/j.amjsurg.2021.05.001	BACKGROUND: Near infrared autofluorescence (NIRAF) detection has previously demonstrated significant potential for real-time parathyroid gland identification. However, the performance of a NIRAF detection device - PTeyeÂ® - remains to be evaluated relative to a surgeon's own ability to identify parathyroid glands. METHODS: Patients eligible for thyroidectomy and/or parathyroidectomy were enrolled…		1	59
83	JOUR	Comparison of indocyanine green fluorescence and parathyroid autofluorescence imaging in the identification of parathyroid glands during thyroidectomy.	Kahramangil, Bora, Berber, Eren	2017/12//		Gland surgery	6	eng	6	644	648	10.21037/gs.2017.09.04	BACKGROUND: Indocyanine green fluorescence (ICGF) and parathyroid autofluorescence (AF) are two new techniques that aid in the identification of parathyroid glands (PG) intraoperatively during thyroidectomy. There is no study comparing the efficacy of these techniques. METHODS: This was an IRB-approved clinical study comparing the utility of ICGF and AF for identification of PGs during thyroidect…		1	60
107	JOUR	Innovative surgical guidance for label-free real-time parathyroid identification.	Thomas, Giju, McWade, Melanie A, Nguyen, John Q, Sanders, Melinda E, Broome, James T, Baregamian, Naira, SolÃ³rzano, Carmen C, Mahadevan-Jansen, Anita	2019/01//	Adult, Aged, Female, Fiber Optic Technology, Humans, Intraoperative Complications, Male, Middle Aged, Optical Imaging, Parathyroid Glands, Parathyroidectomy, Thyroidectomy, Young Adult, diagnostic imaging, instrumentation, prevention & control	Surgery	165	eng	1	114	123	10.1016/j.surg.2018.04.079	BACKGROUND: Difficulty in identifying the parathyroid gland during neck operations can lead to accidental parathyroid gland excisions and postsurgical hypocalcemia. A clinical prototype called as PTeye was developed to guide parathyroid gland identification using a fiber-optic probe that detects near-infrared autofluorescence from parathyroid glands as operating room lights remain on. An Overlay …		1	61
178	JOUR	Developing a Clinical Prototype to Guide Surgeons for Intraoperative Label-Free Identification of Parathyroid Glands in Real Time.	Thomas, Giju, McWade, Melanie A, Paras, Constantine, Mannoh, Emmanuel A, Sanders, Melinda E, White, Lisa M, Broome, James T, Phay, John E, Baregamian, Naira, SolÃ³rzano, Carmen C, Mahadevan-Jansen, Anita	2018/11//	Adolescent, Adult, Aged, Aged, 80 and over, Female, Humans, Intraoperative Complications, Male, Middle Aged, Parathyroid Glands, Parathyroidectomy, Thyroid Gland, Thyroidectomy, Young Adult, adverse effects, etiology, injuries, prevention & control, surgery	Thyroid : official journal of the American Thyroid Association	28	eng	11	1517	1531	10.1089/thy.2017.0716	BACKGROUND: Patients undergoing thyroidectomy may have inadvertent damage or removal of the parathyroid gland(s) due to difficulty in real-time parathyroid identification. Near-infrared autofluorescence (NIRAF) has been demonstrated as a label-free modality for intraoperative parathyroid identification with high accuracy. This study presents the translation of that approach into a user-friendly c…		1	62
66	JOUR	Imaging or Fiber Probe-Based Approach? Assessing Different Methods to Detect Near Infrared Autofluorescence for Intraoperative Parathyroid Identification.	Thomas, Giju, Squires, Malcolm H, Metcalf, Tyler, Mahadevan-Jansen, Anita, Phay, John E	2019/12//	Adult, Female, Follow-Up Studies, Humans, Male, Microsurgery, Middle Aged, Optical Imaging, Parathyroid Glands, Parathyroidectomy, Postoperative Complications, Retrospective Studies, Spectroscopy, Near-Infrared, Surgery, Computer-Assisted, Thyroidectomy, diagnostic imaging, methods, prevention & control, surgery	Journal of the American College of Surgeons	229	eng	6	596	608.e3	10.1016/j.jamcollsurg.2019.09.003	BACKGROUND: Near infrared autofluorescence (NIRAF) can guide intraoperative parathyroid gland (PG) identification. NIRAF detection devices typically rely on imaging and fiber probe-based approaches. Imaging modalities provide NIRAF pictures on adjacent display monitors, and fiber probe-based systems measure tissue NIRAF and provide real-time quantitative information to objectively aid PG identifi…		1	63
109	JOUR	Intraoperative near-infrared imaging of parathyroid glands: A comparison of first- and second-generation technologies.	Akbulut, Serkan, Erten, Ozgun, Gokceimam, Mehmet, Kim, Yoo S, Krishnamurthy, Vikram, Heiden, Katherine, Jin, Judy, Siperstein, Allan, Berber, Eren	2021/03//	Female, Humans, Male, Metals, Middle Aged, Optical Imaging, Parathyroid Diseases, Parathyroid Glands, Parathyroidectomy, Prognosis, Prospective Studies, Semiconductors, Spectroscopy, Near-Infrared, chemistry, diagnostic imaging, methods, pathology, surgery	Journal of surgical oncology	123	eng	4	866	871	10.1002/jso.26336	BACKGROUND: Intraoperative near-infrared imaging (NIFI) of parathyroid glands (PG) by first-generation technology had limited image quality and depth penetration. Second-generation NIFI has recently been introduced. Our aim was to compare (1) capability to detect PG and (2) image quality between older and newer technologies. METHODS: Accurately detecting PG, as well as, quality of autofluorescenc…		1	64
23	JOUR	A novel study for fluorescence patterns of the parathyroid glands during surgery using a fluorescence spectroscopy system.	Idogawa, Hiroshi, Sakashita, Tomohiro, Homma, Akihiro	2020/05//		European archives of oto-rhino-laryngology : official journal of the European Federation of Oto-Rhino-Laryngological Societies (EUFOS) : affiliated with the German Society for Oto-Rhino-Laryngology - Head and Neck Surgery	277	eng	5	1525	1529	10.1007/s00405-020-05849-4	PURPOSE: Recently it was reported that the parathyroid glands (PGs) emit autofluorescence when exposed to near infrared light, and a technique using fluorescence to detect the PGs intraoperatively was found to be useful. In some cases, however, it was difficult to detect the PGs. We sought to clarify the situation regarding such undetectable cases. METHODS: The study comprised 45 patients (50 sid…		1	65
75	JOUR	A comparison of the quantitative evaluation of in situ parathyroid gland perfusion by indocyanine green fluorescence angiography and by visual examination in thyroid surgery.	Yavuz, Erkan, Biricik, Aytac, Karagulle, Onur Olgac, Ercetin, Candas, Arici, Sinan, Yigitbas, Hakan, Meric, Serhat, Solmaz, Ali, Celik, Atilla, Gulcicek, Osman Bilgin	2020/08//	Fluorescein Angiography, Humans, Hypoparathyroidism, Indocyanine Green, Parathyroid Glands, Postoperative Complications, Thyroid Gland, Thyroidectomy, surgery	Archives of endocrinology and metabolism	64	eng	4	427	435	10.20945/2359-3997000000219	Objective The most vital complications of thyroidectomy are recurrent nerve damage and hypocalcaemia. We aimed to compare the tissue perfusion scores (PS) of IG fluorescence angiography (IGFA) and visual examination by the surgeon after total thyroidectomy. Subjects and methods Forty-three patients were accepted into the study. Localisation of the parathyroid gland (PG) was determined by the nake…		1	66
4	JOUR	A novel and generic workflow of indocyanine green perfusion assessment integrating standardization and quantification towards clinical implementation.	Noltes, Milou E, Metman, Madelon JH, Heeman, Wido, Rotstein, Lorne, Ginhoven, Tessa M van, Vriens, Menno R, Engelsman, Anton F, Boerma, Christiaan E, Brouwers, Adrienne H, Dam, Gooitzen M van, Pastern, Jesse D, Kruijff, Schelto	2021///		Annals of surgery						10.1097/SLA.0000000000004978.			1	93
590	JOUR	Identification of Altered Circular RNA Expression in Serum Exosomes from Patients with Papillary Thyroid Carcinoma by High-Throughput Sequencing.	Yang, Chunjiang, Wei, Youchun, Yu, Leitao, Xiao, Yong	2019/04//	Adult, Computational Biology, Exosome Multienzyme Ribonuclease Complex, Exosomes, Female, Gene Expression Profiling, Gene Expression Regulation, Neoplastic, High-Throughput Nucleotide Sequencing, Humans, Middle Aged, Oligonucleotide Array Sequence Analysis, RNA, RNA, Circular, Real-Time Polymerase Chain Reaction, Thyroid Cancer, Papillary, Thyroid Neoplasms, Transcriptome, blood, genetics, metabo…	Medical science monitor : international medical journal of experimental and clinical research	25	eng		2785	2791	10.12659/MSM.915658	BACKGROUND This study aimed to identify altered exosome circular RNA (circRNA) in the serum of patients with papillary thyroid carcinoma using high-throughput sequencing. MATERIAL AND METHODS Serum was collected from three patients with papillary thyroid carcinoma and three patients with a benign thyroid goiter. Exosomes were isolated using an exosome isolation kit and confirmed by transmission e…			68
38	JOUR	Surgical margins in oral squamous cell cancer: intraoperative evaluation and prognostic impact.	Mannelli, Giuditta, Comini, Lara Valentina, Piazza, Cesare	2019/04//	Bone and Bones, Carcinoma, Squamous Cell, Frozen Sections, Humans, Intraoperative Care, Margins of Excision, Mouth Neoplasms, Optical Imaging, Oral Surgical Procedures, Prognosis, Reproducibility of Results, Spectrum Analysis, pathology, surgery	Current opinion in otolaryngology & head and neck surgery	27	eng	2	98	103	10.1097/MOO.0000000000000516	PURPOSE OF REVIEW: To summarize recent findings regarding surgical management of oral squamous cell cancer (OSCC) through analysis of different intraoperative techniques for assessment of margins, evaluate the pros and cons of each, and ensuing prognostic impact. RECENT FINDINGS: 'En bloc' OSCC resection and histopathologic evaluation of margins on the formalin-fixed specimen remain the 'gold sta…			69
15	JOUR	Molecular Imaging of Galectin-1 Expression as a Biomarker of Papillary Thyroid Cancer by Using Peptide-Functionalized Imaging Probes.	Fanfone, Deborah, Stanicki, Dimitri, Nonclercq, Denis, Port, Marc, Vander Elst, Luce, Laurent, Sophie, Muller, Robert N, Saussez, Sven, Burtea, Carmen	2020/03//		Biology	9	eng	3			10.3390/biology9030053	Thyroid cancers are the most frequent endocrine cancers and their incidence is increasing worldwide. Thyroid nodules occur in over 19-68% of the population, but only 7-15% of them are diagnosed as malignant. Diagnosis relies on a fine needle aspiration biopsy, which is often inconclusive and about 90% of thyroidectomies are performed for benign lesions. Galectin-1 has been proposed as a confident…			70
193	JOUR	Laparoscopic cholecystectomy with aberrant bile duct detected by intraoperative fluorescent cholangiography concomitant with angiography: A case report.	Tsuruda, Yusuke, Okumura, Hiroshi, Setoyama, Tetsuro, Hiwatashi, Kiyokazu, Minami, Koji, Ando, Kei, Wada, Masumi, Maenohara, Shigeho, Natsugoe, Shoji	2018///		International journal of surgery case reports	51	eng		14	16	10.1016/j.ijscr.2018.08.009	INTRODUCTION: Laparoscopic cholecystectomy is the standard surgical treatment for patients with benign gallbladder disease. However, bile duct injury continues to be reported as a surgical complication. Intraoperative cholangiography is recommended to reduce the risk of bile duct injury during laparoscopic cholecystectomy. Intraoperative cholangiography using indocyanine green, which is excreted …			71
348	JOUR	Chlamydia pneumoniae eradication from carotid plaques. Results of an open, randomised treatment study.	Melissano, G, Blasi, F, Esposito, G, Tarsia, P, Dordoni, L, Arosio, C, Tshomba, Y, Fagetti, L, Allegra, L, Chiesa, R	1999/10//	Aged, Aged, 80 and over, Anti-Bacterial Agents, Antibodies, Bacterial, Arteriosclerosis, Carotid Stenosis, Chlamydia Infections, Chlamydophila pneumoniae, DNA Primers, DNA, Bacterial, Endarterectomy, Carotid, Female, Fluorescent Antibody Technique, Humans, Male, Middle Aged, Polymerase Chain Reaction, Prospective Studies, Roxithromycin, Treatment Outcome, analysis, chemistry, drug therapy, geneti…	European journal of vascular and endovascular surgery : the official journal of the European Society for Vascular Surgery	18	eng	4	355	359	10.1053/ejvs.1999.0915	OBJECTIVE: to determine the effect of specific antibiotic treatment with roxithromycin in the eradication of Chlamydia pneumoniae from carotid artery plaques. DESIGN: prospective open randomised treatment study. PATIENTS AND METHODS: we analysed 32 patients (16 females, mean age 70.1+/-14.7 years) who underwent surgery for the removal of atherosclerotic plaques from carotid arteries. During surge…			72
369	JOUR	Tracheal suture in rats with hypothyroidism: wound healing study.	Zimmermann, Elise, Ribas-Filho, Jurandir Marcondes, Malafaia, Osvaldo, Ribas, Carmen AustrÃ¡lia Paredes Marcondes, Nassif, Paulo Afonso Nunes, Stieven Filho, Edmar, Przysiezny, Paulo Eduardo	2009///	Animals, Collagen, Coloring Agents, Disease Models, Animal, Eosine Yellowish-(YS), Fluorescent Dyes, Hematoxylin, Hypothyroidism, Inflammation, Male, Microscopy, Rats, Rats, Wistar, Suture Techniques, Trachea, Wound Healing, biosynthesis, methods, pathology, physiology, physiopathology, surgery	Acta cirurgica brasileira	24	eng	4	282	289	10.1590/s0102-86502009000400007	PURPOSE: To evaluate the influence of hypothyroidism in tracheal wound healing process. METHODS: A controlled study was designed with 48 male Wistar rats, divided into two groups: study and control groups. In the first one hypothyroidism was surgically induced and 10 weeks after, a tracheal opening followed by suture was performed in both groups, subdivided into 7, 14, and 21 days in accordance w…			73
588	JOUR	Biological dosimetry in patients treated with iodine-131 for differentiated thyroid carcinoma.	M'Kacher, R, Legal, J D, Schlumberger, M, Voisin, P, Aubert, B, Gaillard, N, Parmentier, C	1996/11//	Carcinoma, Chromosome Aberrations, Chromosomes, Human, Pair 4, Cobalt Radioisotopes, Dose-Response Relationship, Radiation, Humans, In Situ Hybridization, Fluorescence, In Vitro Techniques, Iodine Radioisotopes, Lymphocytes, Male, Middle Aged, Radiotherapy Dosage, Thyroid Neoplasms, radiation effects, radiotherapy, therapeutic use	Journal of nuclear medicine : official publication, Society of Nuclear Medicine	37	eng	11	1860	1864		Biological dosimetry was applied to 30 patients with differentiated thyroid carcinoma who were treated with 131I (3.7 GBq) to ablate thyroid remnants after surgery or in case of metastases. METHODS: Chromosomal aberrations were scored in peripheral blood samples obtained before and 4 days after the first administration of 3.7 GBq 131I according to two methods: conventional cytogenetics and chromo…			74
1	JOUR	Amphiphilic redox-sensitive NIR BODIPY nanoparticles for dual-mode imaging and photothermal therapy.	Wang, Xin, Lin, Wenhai, Zhang, Wei, Li, Cheng, Sun, Tingting, Chen, Guang, Xie, Zhigang	2019/02//	Animals, Antineoplastic Agents, Boron Compounds, Female, Fluorescent Dyes, HeLa Cells, Humans, Mice, Mice, Inbred Strains, Mice, Nude, Nanoparticles, Neoplasms, Experimental, Optical Imaging, Oxidation-Reduction, Particle Size, Phototherapy, Polyethylene Glycols, Surface Properties, Surface-Active Agents, Uterine Cervical Neoplasms, chemical synthesis, chemistry, diagnostic imaging, drug therapy,…	Journal of colloid and interface science	536	eng		208	214	10.1016/j.jcis.2018.10.051	Theranostics, integrating tumor treatment and diagnosis concurrently, has become an emerging and meaningful strategy in cancer therapy. In this work, an amphiphilic redox-sensitive near-infrared (NIR) BODIPY dye, which could be formed into nanoparticles (PEG-SS-BDP NPs) by self-assembly, was synthesized and possessed good capability of photothermal therapy (PTT), near-infrared fluorescence (NIRF)…			75
81	JOUR	Liposarcoma of the Thyroid: A Case Report with a Review of the Literature.	Guarda, Vittoria, Pickhard, Anja, Boxberg, Melanie, Specht, Katja, Buchberger, Anna Maria Stefanie	2018/03//		European thyroid journal	7	eng	2	102	108	10.1159/000486333	BACKGROUND: Liposarcomas of the thyroid gland are extremely rare tumors, and, to our knowledge, only 12 cases have been reported in the English literature. An accurate diagnosis is challenging due to the nonspecific clinical presentation of this cancer, frequently defined just by a swelling of the neck. PATIENT FINDINGS: We present an 82-year-old woman with liposarcoma of the thyroid, complaining…			76
722	JOUR	Occurrence of thyrocyte HLA class II expression in a wide variety of thyroid diseases: relationship with lymphocytic infiltration and thyroid autoantibodies.	Lucas-Martin, A, Foz-Sala, M, Todd, I, Bottazzo, G F, Pujol-Borrell, R	1988/02//	Adolescent, Adult, Aged, Autoantibodies, Child, Endothelium, Fluorescent Antibody Technique, Graves Disease, HLA Antigens, HLA-D Antigens, Humans, Lymphocytes, Middle Aged, Thyroid Diseases, Thyroid Gland, Thyroid Neoplasms, Thyroiditis, Autoimmune, analysis, cytology, immunology, pathology	The Journal of clinical endocrinology and metabolism	66	eng	2	367	375	10.1210/jcem-66-2-367	The proteins of the major histocompatibility system (HLA in humans) play an essential role in the regulation of immune responses due to their involvement in the presentation of antigen to T lymphocytes. Thyroid follicular cells (thyrocytes) from patients with Graves' disease and Hashimoto's thyroiditis demonstrate increased expression of HLA class I and aberrantly or inappropriately express class…			77
209	JOUR	Genetic alterations in papillary thyroid carcinoma and hashimoto thyroiditis: An analysis of hOGG1 loss of heterozygosity.	Royer, Mark C, Zhang, Haihong, Fan, Chun-Yang, Kokoska, Mimi S	2010/03//	Carcinoma, Papillary, DNA Glycosylases, Goiter, Hashimoto Disease, Humans, Loss of Heterozygosity, Microdissection, Microsatellite Repeats, Polymerase Chain Reaction, Thyroid Gland, Thyroid Neoplasms, Thyroidectomy, genetics, pathology, surgery	Archives of otolaryngology--head & neck surgery	136	eng	3	240	242	10.1001/archoto.2010.20	OBJECTIVES: To determine the relationship between hOGG1 loss of heterozygosity (LOH), Hashimoto thyroiditis (HT), and papillary thyroid cancer (PTC). Hashimoto thyroiditis is an autoimmune mediated chronic inflammatory disease previously shown to coexist with papillary PTC. To further define the relationship between HT and PTC, we report an analysis of hOGG1, a major repair gene for free radical-…			78
98	JOUR	Feasibility and reliability of supermicrosurgical vasa recta anastomosis for double-pedicled free jejunum transfer.	Iida, Takuya, Saito, Takafumi, Yoshimatsu, Hidehiko, Koshima, Isao	2019/03//		JPRAS open	19	eng		125	134	10.1016/j.jpra.2019.01.004	BACKGROUND: Although free jejunal transfer is an established and reliable procedure for reconstruction after total pharyngolaryngectomy (TPL), vascular thrombosis remains a surgical challenge. To reduce the risk, a double-pedicled free jejunal flap transfer has been attempted using a root jejunal artery and an arcade artery, although several drawbacks exist. The vasa recta are terminal straight v…			79
637	JOUR	DNA damage and gene expression changes in patients exposed to low-dose X-radiation during neuro-interventional radiology procedures.	Visweswaran, Shangamithra, Joseph, Santhosh, S, Vinay Hegde, O, Annalakshmi, Jose, M T, Perumal, Venkatachalam	2019/08//	4-1BB Ligand, Adolescent, Adult, Aged, Aged, 80 and over, Ataxia Telangiectasia Mutated Proteins, Cell Cycle Proteins, DNA Damage, Dose-Response Relationship, Radiation, Female, Gene Expression, Histones, Humans, Male, Middle Aged, Radiation Dosage, Radiation Exposure, Radiography, Interventional, Real-Time Polymerase Chain Reaction, Tumor Suppressor Protein p53, Young Adult, adverse effects, bio…	Mutation research	844	eng		54	61	10.1016/j.mrgentox.2019.05.011	Interventional radiology-based imaging is the preferred choice for diagnosis and therapy of many complex diseases, despite possible adverse effects of the radiation exposures. We have measured induced DNA damage and changes in gene expression in relation to entrance surface dose (ESD) in peripheral blood samples of patients (nâ=â51) who underwent neuro-interventional radiological procedures. …			80
239	JOUR	Toward the application of proteomics to human thyroid tissue.	Krause, Kerstin, Schierhorn, Angelika, Sinz, Andrea, Wissmann, Johannes-Dieter, Beck-Sickinger, Annette G, Paschke, Ralf, Fuhrer, Dagmar	2006/11//	Cell Fractionation, Cell Membrane, Chromatography, Cytosol, Electrophoresis, Gel, Two-Dimensional, Humans, Hydrogen-Ion Concentration, Mass Spectrometry, Microdissection, Proteomics, Reproducibility of Results, Solubility, Thyroglobulin, Thyroid Gland, Thyroid Nodule, isolation & purification, metabolism, methods, physiopathology, standards	Thyroid : official journal of the American Thyroid Association	16	eng	11	1131	1143	10.1089/thy.2006.16.1131	CONTEXT: In this paper we describe for the first time a systematic approach to proteome analysis of human thyroid tissue. OBJECTIVE AND DESIGN: We report different methods to decrease the complexity of the human thyroid tissue proteome by applying different solubilization strategies and correcting for thyroglobulin protein abundance; to increase the protein resolution by prefractionation and by t…			81
562	JOUR	The Evaluation of Liver Function and Surgical Influence by ICGR15 after Chemotherapy for Colorectal Liver Metastases.	Hiwatashi, Kiyokazu, Ueno, Shinichi, Sakoda, Masahiko, Iino, Satoshi, Minami, Koji, Mori, Shinichiro, Kita, Yoshiaki, Baba, Kenji, Kurahara, Hiroshi, Mataki, Yuko, Maemura, Kosei, Shinchi, Hiroyuki, Natsugoe, Shoji	2016///		Journal of Cancer	7	eng	5	595	599	10.7150/jca.13759	Background; Approximately 60% of patients with colorectal cancer develop liver metastasis at some point after diagnosis. The aim of this study is to investigate whether the evaluation of ICGR15 preoperatively is a useful clinical indicator of hepatic injury following chemotherapy and to investigate the influence of multiple chemotherapies on liver function. Results; Mean ICGR15 values were higher…			82
194	JOUR	Flow cytometry in the differential diagnostics of Hashimoto's thyroiditis and MALT lymphoma of the thyroid.	Adamczewski, Zbigniew, StasioÅek, Mariusz, Dedecjus, Marek, Smolewski, Piotr, LewiÅski, Andrzej	2015///	Biopsy, Fine-Needle, Diagnosis, Differential, Female, Flow Cytometry, Humans, Lymphoma, Non-Hodgkin, Male, Stomach Neoplasms, Thyroid Gland, Thyroid Neoplasms, diagnostic imaging, pathology	Endokrynologia Polska	66	eng	1	73	78	10.5603/EP.2015.0001	INTRODUCTION: A combination of traditional cytology methods with fluorescence activated cell sorting (FACS) analysis of fine-needle aspiration biopsy (FNAB) material is considered a powerful diagnostic tool in the differential diagnosis of thyroid lesions suspected of mucosa-associated lymphoid tissue lymphoma (MALT-L). The aim of this study was to demonstrate the FACS-based diagnostic process of…			83
183	JOUR	Expression of the NOB1 gene and its clinical significance in papillary thyroid carcinoma.	Lin, Shan, Meng, Wei, Zhang, Wei, Liu, Jia, Wang, Peisong, Xue, Shuai, Chen, Guang	2013/06//	Adult, Carcinoma, Carcinoma, Papillary, Female, Gene Expression, Goiter, Nodular, Humans, Immunohistochemistry, Male, Middle Aged, Neoplasm Staging, Nuclear Proteins, RNA, Messenger, RNA-Binding Proteins, Real-Time Polymerase Chain Reaction, Thyroid Cancer, Papillary, Thyroid Gland, Thyroid Neoplasms, Tumor Burden, genetics, metabolism, pathology	The Journal of international medical research	41	eng	3	568	572	10.1177/0300060513479862	OBJECTIVE: The aim of this study was to explore the relationships between expression of the NIN1/RPN12 binding protein 1 homologue gene (NOB1) in papillary thyroid carcinoma tissue and clinicopathological variables. METHODS: Expression of NOB1 in papillary thyroid carcinoma, normal thyroid and benign thyroid tumour tissue was evaluated at the mRNA and protein levels by real-time fluorescence quan…			84
253	JOUR	Mammary analog secretory carcinoma of the thyroid gland: A primary thyroid adenocarcinoma harboring ETV6-NTRK3 fusion.	Dogan, Snjezana, Wang, Lu, Ptashkin, Ryan N, Dawson, Robert R, Shah, Jatin P, Sherman, Eric J, Michael Tuttle, R, Fagin, James A, Klimstra, David S, Katabi, Nora, Ghossein, Ronald A	2016/09//	Adenocarcinoma, Aged, Biomarkers, Tumor, Disease Progression, Disease-Free Survival, Female, Gene Fusion, Gene Rearrangement, Genetic Predisposition to Disease, Humans, Immunohistochemistry, In Situ Hybridization, Fluorescence, Male, Mammary Analogue Secretory Carcinoma, Middle Aged, Neoplasm Grading, Neoplasm Recurrence, Local, Neoplasm Staging, Oncogene Proteins, Fusion, Phenotype, Thyroid Neop…	Modern pathology : an official journal of the United States and Canadian Academy of Pathology, Inc	29	eng	9	985	995	10.1038/modpathol.2016.115	ETV6-NTRK3 fusion was identified in several cancers including the recently described mammary analog secretory carcinoma (MASC) of the salivary glands and a minority of papillary thyroid carcinomas. We describe three cases of primary MASC of the thyroid gland and provide a detailed clinical and pathological characterization of the tumor morphology, immunoprofile, and genetic background. Immunohist…			85
168	JOUR	Copper, zinc, and selenium in whole blood and thyroid tissue of people with various thyroid diseases.	Kucharzewski, M, Braziewicz, J, Majewska, U, GÃ³zdz, S	2003///	Adolescent, Adult, Aged, Copper, Female, Humans, Male, Middle Aged, Selenium, Spectrometry, X-Ray Emission, Thyroid Diseases, Thyroid Gland, Zinc, analysis, blood, chemistry, metabolism	Biological trace element research	93	eng	1-3	9	18	10.1385/BTER:93:1-3:9	We investigated the possible differences among the concentrations of copper, zinc, and selenium, and their mutual relations in the whole blood and thyroid tissue of patients with various thyroid disorders. Trace elements were determined by total-reflection X-ray fluorescence. The mean levels of these metals in blood as well as the mean Cu/Zn, Cu/Se, and Zn/Se ratios in the patients with thyroid c…			86
697	JOUR	Overexpression of immediate early genes in active Graves' ophthalmopathy.	Lantz, Mikael, Vondrichova, Tereza, Parikh, Hemang, Frenander, Christofer, RidderstrÃ¥le, Martin, Asman, Peter, Aberg, Magnus, Groop, Leif, Hallengren, Bengt	2005/08//	Adipose Tissue, Aged, Cysteine-Rich Protein 61, Eyelids, Female, Gene Expression, Genes, Immediate-Early, Graves Disease, Humans, Immediate-Early Proteins, Intercellular Signaling Peptides and Proteins, Male, Middle Aged, Oligonucleotide Array Sequence Analysis, Orbit, Prospective Studies, genetics, pathology, physiology, physiopathology	The Journal of clinical endocrinology and metabolism	90	eng	8	4784	4791	10.1210/jc.2004-2275	CONTEXT: In Graves' ophthalmopathy a major problem is an increase in the intraorbital adipose tissue volume. OBJECTIVE: The aim of this work was to define mechanisms of orbital adipogenesis. DESIGN: This was an open-label prospective study. SETTING: The study was conducted at the Clinic of Endocrinology, University Hospital. PARTICIPANTS: The study consisted of patients (n = 5) with severe ophtha…			87
730	JOUR	Constructing reduction-sensitive PEGylated NIRF mesoporous silica nanoparticles via a one-pot Passerini reaction for photothermal/chemo-therapy.	Zhu, Yu, Lin, Wenhai, Wang, Xin, Zhang, Wei, Chen, Li, Xie, Zhigang	2018/10//		Chemical communications (Cambridge, England)	54	eng	84	11921	11924	10.1039/c8cc07106c	In this work, we decorated the surface of MSNs by a one-pot Passerini reaction using near-infrared fluorescence BODIPY and poly(ethylene glycol) with an aldehyde group (PEG-CHO) for the first time. Doxorubicin (Dox) was loaded to demonstrate the reduction response. The formed MSNs neatly integrate chemotherapy, photothermal therapy and near-infrared fluorescence (NIRF) imaging.			88
737	JOUR	[Study on the mechanism of miR-497-induced laryngeal squamous cell carcinoma growth inhibition by targeting CDK6].	Niu, J T, Liu, S G, Yan, P, Li, C	2019/02//	Apoptosis, Carcinoma, Squamous Cell, Cell Line, Tumor, Cell Proliferation, Cyclin-Dependent Kinase 6, Genes, Tumor Suppressor, Humans, Laryngeal Neoplasms, MicroRNAs, Prognosis, RNA, Small Interfering, Up-Regulation, genetics, metabolism, pathology	Zhonghua er bi yan hou tou jing wai ke za zhi = Chinese journal of otorhinolaryngology head and neck surgery	54	chi	2	126	132	10.3760/cma.j.issn.1673-0860.2019.02.006	Objective: To study the effects of miR-497 and CDK6 on the growth of laryngeal squamous cell carcinoma (LSCC). Methods: The expressions of CDK6 mRNA in fresh LSCC specimens, the adjacent normal mucosa of LSCC, and cell lines of LSCC were detected with quantitative real time polymerase chain reaction, pcDNA3.1(+) CDK6 plasmids were respectively transfected into the LSCC cells, and MTT assay and cl…			89
554	JOUR	Peripheral nerve hyperexcitability: a clinical and immunologic study of 38 patients.	Rubio-Agusti, I, Perez-Miralles, F, Sevilla, T, Muelas, N, Chumillas, M J, Mayordomo, F, Azorin, I, Carmona, E, Moscardo, F, Palau, J, Jacobson, L, Vincent, A, Vilchez, J J, Bataller, L	2011/01//	Adolescent, Adult, Aged, Antibodies, Antinuclear, Biopsy, Electrophysiology, Female, Fluorescent Antibody Technique, Humans, Inflammation, Male, Middle Aged, Muscle, Skeletal, Myasthenia Gravis, Paraneoplastic Polyneuropathy, Peripheral Nervous System Diseases, Potassium Channels, Voltage-Gated, Radioimmunoprecipitation Assay, Risk Factors, Thymoma, Thyroid Neoplasms, Young Adult, immunology, met…	Neurology	76	eng	2	172	178	10.1212/WNL.0b013e3182061b1e	OBJECTIVE: We studied a case series of peripheral nerve hyperexcitability (PNH) aiming to describe clinical characteristics, immunologic and cancer associations, antibodies against neuronal antigens (voltage-gated potassium channel antibodies [VGKC-Abs] and other), and muscle biopsy findings. METHODS: Patients presenting with clinical and electrophysiologic signs of PNH were selected. We studied …			90
623	JOUR	Topical rebamipide treatment for superior limbic keratoconjunctivitis in patients with thyroid eye disease.	Takahashi, Yasuhiro, Ichinose, Akihiro, Kakizaki, Hirohiko	2014/04//	Administration, Topical, Adult, Aged, Alanine, Antioxidants, Female, Fluorescein, Fluorescent Dyes, Graves Ophthalmopathy, Humans, Keratoconjunctivitis, Limbus Corneae, Male, Middle Aged, Ophthalmic Solutions, Osmolar Concentration, Quinolones, Retrospective Studies, Rose Bengal, Tears, Treatment Outcome, administration & dosage, analogs & derivatives, chemistry, diagnosis, drug effects, drug the…	American journal of ophthalmology	157	eng	4	807	812.e2	10.1016/j.ajo.2013.12.027	PURPOSE: To evaluate efficacy of topical rebamipide for superior limbic keratoconjunctivitis (SLK) in patients with thyroid eye disease. DESIGN: Retrospective, observational case series. METHODS: Thirty-three eyes from 20 thyroid eye disease patients with SLK who received topical rebamipide (Mucosta ophthalmic suspension unit dose 2%; Otsuka Pharmaceutical Co, Ltd; chemical name, (2RS)-2-(4-chlor…			91
589	JOUR	A novel polydopamine electrochemiluminescence organic nanoparticle-based biosensor for parathyroid hormone detection.	Li, Shijie, Liu, Yang, Ma, Qiang	2019/09//	Biosensing Techniques, Electrochemical Techniques, Humans, Indoles, Luminescent Measurements, Nanoparticles, Parathyroid Hormone, Particle Size, Polymers, Surface Properties, blood, chemistry	Talanta	202	eng		540	545	10.1016/j.talanta.2019.05.022	In this work, polydopamine electrochemiluminescence (ECL)-organic nanoparticles (EONs) based immunosensing strategy was designed for parathyroid hormone (PTH) detection. Dopamine is oxidized and polymerized to form polydopamine organic nanoparticle via self-polymerization process. Unlike the low photoluminescent efficiency and unsatisfactory fluorescence characters of the fluorescent organic nano…			92
488	JOUR	[Histomorphometric study of lymphocyte population in thyroid in Graves' disease after treatment (author's transl)].	Franc, B, Barres, D, Baglin, C, Garnier, H, Mignot, M, Mignot, J	1981///	Fluorescent Antibody Technique, Graves Disease, Humans, Leukocyte Count, Lymphocytes, Recurrence, Thyroid Gland, Thyroidectomy, diagnosis, pathology, therapy	Annales de pathologie	1	fre	1	90	94		The degree of lymphocyte infiltration in subtotal thyroidectomy specimens from patients with treated Graves' disease varies greatly from one case to another. A morphometric study, employing standard and immunofluorescent slides was conducted to evaluate possible statistical correlations between clinical and morphological findings. Quantitative lymphoplasmocytic cellularity differences appeared to…			67
27	JOUR	Evaluation of a cholecystokinin 2 receptor-targeted near-infrared dye for fluorescence-guided surgery of cancer.	Wayua, Charity, Low, Philip S	2014/02//	Animals, Benzodiazepinones, Drug Delivery Systems, Fluorescent Dyes, HEK293 Cells, Humans, Indoles, Infrared Rays, Mice, Molecular Structure, Neoplasms, Protein Binding, Receptor, Cholecystokinin B, chemical synthesis, chemistry, metabolism, surgery	Molecular pharmaceutics	11	eng	2	468	476	10.1021/mp400429h	Surgical resection of malignant disease remains one of the most effective tools for treating cancer. Tumor-targeted near-infrared dyes have the potential to improve contrast between normal and malignant tissues, thereby enabling surgeons to more quantitatively resect malignant disease. Because the cholecystokinin 2 receptor (CCK2R and its tumor-specific splice variant CCK2i4svR) is overexpressed …			94
625	JOUR	Differentiated Thyroid Carcinoma in Pediatric Age: Genetic and Clinical Scenario.	Galuppini, Francesca, Vianello, Federica, Censi, Simona, Barollo, Susi, Bertazza, Loris, Carducci, Sofia, Colato, Chiara, Manso, Jacopo, Rugge, Massimo, Iacobone, Maurizio, Watutantrige Fernando, Sara, Pennelli, Gianmaria, Mian, Caterina	2019///		Frontiers in endocrinology	10	eng		552	552	10.3389/fendo.2019.00552	Introduction: Follicular-derived differentiated thyroid carcinoma (DTC) is the most common endocrine and epithelial malignancy in children. The differences in the clinical and pathological features of pediatric vs. adult DTC could relate to a different genetic profile. Few studies are currently available in this issue, however, and most of them involved a limited number of patients and focused ma…			95
645	JOUR	Efficacy of serologic testing in asymmetric sensorineural hearing loss.	Sabini, P, Sclafani, A P	2000/04//	Adult, Aged, Aged, 80 and over, Diabetes Complications, Evoked Potentials, Auditory, Brain Stem, Female, Fluorescent Treponemal Antibody-Absorption Test, Hearing Loss, Sensorineural, Humans, Lyme Disease, Magnetic Resonance Imaging, Male, Middle Aged, Serologic Tests, Surveys and Questionnaires, complications, diagnosis, etiology	Otolaryngology--head and neck surgery : official journal of American Academy of Otolaryngology-Head and Neck Surgery	122	eng	4	469	476	10.1067/mhn.2000.102180	PURPOSE: The goal of this study was to determine the efficacy of a detailed questionnaire, auditory brain stem response testing (ABR), MRI, and an extensive battery of serologic tests in diagnosing asymmetric sensorineural hearing loss (ASNHL). METHODS AND MATERIAL: Patients with audiograms demonstrating ASNHL of 10 dB or greater in 2 consecutive frequencies or 15 dB in any 1 frequency between 25…			96
650	JOUR	Radiosensitivity of human normal and tumoral thyroid cells using fluorescence in situ hybridization and clonogenic survival assay.	Gaussen, A, Legal, J D, Beron-Gaillard, N, Laplanche, A, Travagli, J P, Caillou, B, Parmentier, C	1999/06//	Adenoma, Carcinoma, Cell Survival, Dose-Response Relationship, Radiation, Humans, In Situ Hybridization, Fluorescence, Radiation Tolerance, Radiobiology, Thyroid Gland, Thyroid Neoplasms, Tumor Cells, Cultured, cytology, genetics, pathology, radiation effects	International journal of radiation oncology, biology, physics	44	eng	3	683	691	10.1016/s0360-3016(99)00059-0	PURPOSE: By using cell survival as a reference, we evaluated the radiosensitivity of human normal and tumoral thyroid cells using of radiation-induced translocations. METHODS AND MATERIALS: Tissue samples were obtained from patients undergoing thyroidectomy. Cell cultures were established, irradiated with 60Co, and metaphases painted using commercial whole-chromosome 4 hybridization probe and pan…			97
573	JOUR	Anti-centromere antibody-positive SjÃ¶gren's syndrome: A distinct clinical subgroup?	Lee, Kyung-Eun, Kang, Ji-Hyoun, Lee, Jeong-Won, Wen, Lihui, Park, Dong-Jin, Kim, Tae-Jong, Park, Yong-Wook, Lee, Shin-Seok	2015/09//	Adult, Antibodies, Antinuclear, Biomarkers, Biopsy, Female, Fluorescent Antibody Technique, Humans, Male, Middle Aged, Predictive Value of Tests, Prevalence, Prognosis, Republic of Korea, Retrospective Studies, Salivary Glands, Severity of Illness Index, Sjogren's Syndrome, analysis, blood, classification, diagnosis, epidemiology, immunology, pathology	International journal of rheumatic diseases	18	eng	7	776	782	10.1111/1756-185X.12684	AIM: To investigate whether patients with SjÃ¶gren's syndrome (SS) can be distinguished based on the positivity of anti-centromere antibody (ACA), and if so, whether the subgroups differ in their clinical and laboratory features. METHODS: Eleven patients with ACA-positive and 71 patients ACA-negative SS were examined. All patients had minor salivary gland biopsy; sociodemographic data, glandular …			98
520	JOUR	Expression of zinc transporter 8 in thyroid tissues from patients with immune and non-immune thyroid diseases.	Bossowski, Artur, StoÅ¼ek, Karolina, Rydzewska, Marta, NikliÅska, WiesÅawa, GÄ sowska, Marta, Polnik, Dariusz, Szalecki, MieczysÅaw, MikÅosz, Agnieszka, Chabowski, Adrian, ReszeÄ, Joanna	2020/11//		Autoimmunity	53	eng	7	376	384	10.1080/08916934.2020.1815194	INTRODUCTION: Recent studies have revealed the presence of zinc and the expression of zinc transporter (ZnT) family members in most endocrine cell types. It was demonstrated that ZnT family plays an important role in the synthesis and secretion of many hormones. Moreover, recently ZnT8 was described as a newly islet autoantigen in type 1 diabetes. MATERIALS AND METHODS: We studied the expression …			99
422	JOUR	Intercellular adhesion molecule-1 (ICAM-1) in Graves' disease: contrast between in vivo and in vitro results.	Ciampolillo, A, Napolitano, G, Mirakian, R, Miyasaki, A, Giorgino, R, Bottazzo, G F	1993/12//	Antigen-Presenting Cells, Cell Adhesion Molecules, Cells, Cultured, Cytokines, Endothelium, Fluorescent Antibody Technique, Graves Disease, Histocompatibility Antigens Class I, Histocompatibility Antigens Class II, Humans, Immunoenzyme Techniques, Intercellular Adhesion Molecule-1, Thyroid Gland, Thyroidectomy, biosynthesis, immunology	Clinical and experimental immunology	94	eng	3	478	485	10.1111/j.1365-2249.1993.tb08221.x	We have reassessed the possible role of the adhesion molecule ICAM-1 in the pathogenesis of thyroid autoimmunity. In order to do that, we have investigated its expression in eight Graves' thyroids both in vivo (i.e. on cryostat sections and on cell suspensions), and in vitro (i.e. on cells cultured in monolayers for 3 days), and the results were compared with those obtained with similar preparati…			100
461	JOUR	Measurement of 127I concentration in thyroid tissue by x-ray fluorescence.	LeBlanc, A D, Bell, R L, Johnson, P C	1973/11//	Adenocarcinoma, Autopsy, Fluorescence, Goiter, Nodular, Humans, Iodine, Iodine Isotopes, Radionuclide Imaging, Thyroid Diseases, Thyroid Gland, Thyroid Neoplasms, Thyroidectomy, Thyroiditis, metabolism	Journal of nuclear medicine : official publication, Society of Nuclear Medicine	14	eng	11	816	819					101
423	JOUR	Encapsulated anaplastic thyroid carcinoma with three-year disease-free survival.	GuimarÃ£es, L, Meneses, A, Carrara, W, KefalÃ¡s, A	2000///	Aged, Biomarkers, Tumor, Carcinoma, Disease-Free Survival, Fluorescent Antibody Technique, Indirect, Humans, Male, Necrosis, Neoplasm Proteins, Thyroid Neoplasms, Thyroidectomy, analysis, chemistry, pathology, surgery	Pathology, research and practice	196	eng	12	867	70; discussion 871	10.1016/S0344-0338(00)80091-6	This is a report of an unusual anaplastic thyroid carcinoma case with capsule and long disease-free survival. This 74-year-old male, with an asymptomatic nodule in the mid-line neck for 5 years, was treated with total thyroidectomy. Light microscopy and immunohistochemistry showed an anaplastic carcinoma of the thyroid isthmus. There were no signs of carcinoma elsewhere either at the time of surg…			102
329	JOUR	EDTA in dried blood spots leads to false results in neonatal endocrinologic screening.	Holtkamp, Ute, Klein, Jeanette, Sander, Johannes, Peter, Michael, Janzen, Nils, Steuerwald, Ulrike, Blankenstein, Oliver	2008/03//	Blood Specimen Collection, Chelating Agents, Edetic Acid, False Negative Reactions, False Positive Reactions, Humans, Infant, Newborn, Neonatal Screening, Tandem Mass Spectrometry, analysis, blood, methods	Clinical chemistry	54	eng	3	602	605	10.1373/clinchem.2007.096685	BACKGROUND: Blood samples for neonatal screening for inborn errors of metabolism are collected and shipped on standardized filter paper cards. Occasionally these samples are contaminated with EDTA, which is often used for anticoagulation. EDTA may interfere with newborn screening tests based on lanthanide fluorescence and thus lead to false-negative or false-positive results. METHODS: We used tan…			103
547	GEN	Iodine Content and Distribution in Thyroid Specimens from Two Patients with Graves' Disease Pretreated with Either Propylthiouracil or Stable Iodine: Analysis Using X-Ray Fluorescence and Time-of-Flight Secondary Ion Mass Spectrometry.	Hansson, Marie, Filipsson NystrÃ¶m, Helena, Jansson, Svante, Lausmaa, Jukka, Berg, Gertrud	2012///		Case reports in endocrinology	2012	eng		842357	842357	10.1155/2012/842357	Patients with Graves' disease can be medically prepared before surgery in different ways, which may have various effects on iodine stores. Thyroid specimens were collected at surgery from two patients pretreated with propylthiouracil (PTU) and stable iodine, respectively. A quantitative analysis of iodine content was performed using X-ray fluorescence (XRF) in frozen tissue and a qualitative anal…			104
424	JOUR	Advances in detection and diagnosis of head and neck tumors.	Southwick, H W	1976/01//	Angiography, Biopsy, Needle, Carotid Body Tumor, Endoscopes, Head and Neck Neoplasms, Humans, Physical Examination, Radionuclide Imaging, Radiotherapy, Thyroid Neoplasms, Ultrasonics, adverse effects, diagnosis, diagnostic imaging, etiology, instrumentation, methods	Cancer	37	eng	1 suppl	604	611	10.1002/1097-0142(197601)37:1+<604::aid-cncr2820370727>3.0.co;2-g	Cancers of the head and neck are accessible to both inspection and palpation in the majority of patients. This accessibility allows for improvements in detection, through education of the medical profession and also of the allied health personnel. Some of the new advances in detection and diagnosis have been associated with development of new instruments. A new lens system developed by Hopkins al…			105
336	JOUR	Cytofluorometric analysis of lymphocyte subsets in thyroid aspirates from patients with autonomously functioning nodules.	Farsetti, A, Pontecorvi, A, Antonozzi, I, Andreoli, M, Gaetano, C	1990/06//	Adult, Aged, Antibodies, Monoclonal, Biopsy, Needle, CD4-Positive T-Lymphocytes, Female, Flow Cytometry, Fluorescent Antibody Technique, Humans, Iodine Radioisotopes, Leukocyte Count, Male, Middle Aged, T-Lymphocytes, T-Lymphocytes, Regulatory, Thyroid Diseases, Thyroid Gland, immunology, pathology	Clinical endocrinology	32	eng	6	729	738	10.1111/j.1365-2265.1990.tb00919.x	A microscale method, based on two-colour dye immunolabelling and flow sorting cytofluorometry, was used to characterize lymphocyte subsets in thyroid tissue specimens obtained by fine-needle aspiration (FNA) in 21 patients with autonomously functioning thyroid nodule (AFTN) and five patients with cold thyroid nodule (CTN). Inversion of the ratio between CD4+ and CD8+ lymphocytes, due to a relativ…			106
519	JOUR	Development of a calcium-sensing receptor molecular imaging agent.	Yusof, Adlina Mohd, Kothandaraman, Shankaran, Zhang, Xiaoli, Saji, Motoyasu, Ringel, Matthew D, Tweedle, Michael F, Phay, John E	2013/12//	Benzamides, Carcinoma, Medullary, Carcinoma, Neuroendocrine, Cyclohexylamines, Green Fluorescent Proteins, HEK293 Cells, Humans, MAP Kinase Signaling System, Mass Spectrometry, Molecular Imaging, Parathyroid Glands, Receptors, Calcium-Sensing, Recombinant Proteins, Thyroid Neoplasms, antagonists & inhibitors, chemical synthesis, chemistry, genetics, metabolism, methods, pathology, surgery	Surgery	154	eng	6	1378	84; discussion 1384	10.1016/j.surg.2013.06.044	BACKGROUND: Calcium-sensing receptor (CaSR) is expressed by parathyroid cells and thyroid C-cells (from which medullary thyroid carcinoma [MTC] is derived). A molecular imaging agent localizing to the CaSR could improve the detection of parathyroids and MTC preoperatively or intraoperatively. We synthesized a novel compound containing a fluorine residue for potential future labeling and demonstra…			107
587	JOUR	Anaplastic lymphoma kinase (ALK) gene rearrangements in radiation-related human papillary thyroid carcinoma after the Chernobyl accident.	Arndt, Annette, Steinestel, Konrad, Rump, Alexis, Sroya, Manveer, Bogdanova, Tetiana, Kovgan, Leonila, Port, Matthias, Abend, Michael, Eder, Stefan	2018/07//	Anaplastic Lymphoma Kinase, Chernobyl Nuclear Accident, Female, Gene Rearrangement, Humans, Immunochemistry, In Situ Hybridization, Fluorescence, Iodine Radioisotopes, Male, Neoplasms, Radiation-Induced, Point Mutation, Thyroid Cancer, Papillary, Thyroid Neoplasms, Ukraine, genetics, metabolism, pathology, radiation effects	The journal of pathology. Clinical research	4	eng	3	175	183	10.1002/cjp2.102	Childhood radiation exposure has been associated with increased papillary thyroid carcinoma (PTC) risk. The role of anaplastic lymphoma kinase (ALK) gene rearrangements in radiation-related PTC remains unclear, but STRN-ALK fusions have recently been detected in PTCs from radiation exposed persons after Chernobyl using targeted next-generation sequencing and RNA-seq. We investigated ALK and RET g…			108
250	JOUR	BRAF mutation analysis in fine needle aspiration (FNA) cytology of the thyroid.	Jin, Long, Sebo, Thomas J, Nakamura, Nobuki, Qian, Xiang, Oliveira, Andre, Majerus, Julie A, Johnson, Michele R, Lloyd, Ricardo V	2006/09//	Adult, Aged, Aged, 80 and over, Alleles, Biopsy, Fine-Needle, Carcinoma, Papillary, DNA Mutational Analysis, DNA, Neoplasm, Female, Humans, Male, Middle Aged, Mutation, Organic Chemicals, Polymerase Chain Reaction, Proto-Oncogene Proteins B-raf, Thyroid Gland, Thyroid Neoplasms, analysis, chemistry, diagnosis, genetics, methods, pathology	Diagnostic molecular pathology : the American journal of surgical pathology, part B	15	eng	3	136	143	10.1097/01.pdm.0000213461.53021.84	BRAF mutations have been detected in 30% to 80% of papillary thyroid carcinomas (PTC). Several detection methods for BRAF mutation have been reported, but a direct comparison between different assay methods has not been previously reported. In this study, we examined the diagnostic utility of BRAF (T1799A) mutation in 71 cases of thyroid fine needle aspiration specimens using 4 different methods,…			109
243	JOUR	Glucocorticoid receptor subunit gene expression in thyroid gland and adenomas.	Zhang, Xiao-Wen, Li, Yuan, Wang, Zhen-Lin, Li, Peng	2006///	Adenoma, Gene Expression, Humans, RNA, Messenger, Receptors, Glucocorticoid, Reverse Transcriptase Polymerase Chain Reaction, Thyroid Gland, Thyroid Neoplasms, analysis, chemistry, genetics, pathology	Acta oncologica (Stockholm, Sweden)	45	eng	8	1073	1078	10.1080/02841860600602961	The present study was undertaken to investigate whether the glucocorticoid receptor -alpha (GR-alpha) and -beta (GR-beta) mRNA may be expressed in thyroid gland. Ten normal thyroid gland and 14 follicular adenomas were studied using a real-time fluorescent quantitative RT-PCR (FQ-RT-PCR) method. The results demonstrated that there was a lower expression of GR-alpha mRNA (x10(6) GR-alpha cDNA copi…			110
282	JOUR	ASO Author Reflections: Identification of the Thoracic Duct using Indocyanine Green During Cervical Lymphadenectomy.	Chakedis, Jeffery, Phay, John E	2018/11//	Diagnostic Imaging, Humans, Indocyanine Green, Lymph Node Excision, Melanoma, Prognosis, Thoracic Duct, Thyroid Neoplasms, diagnostic imaging, metabolism, methods, pathology, surgery	Annals of surgical oncology	25	eng	12	3718	3718	10.1245/s10434-018-6709-x				111
709	JOUR	Clinical Practice Status of Sentinel Lymph Node Biopsy for Early-Stage Breast Cancer Patients in China: A Multicenter Study.	Zhang, Juliang, Wang, Ting, Yan, Changjiao, Huang, Meiling, Fan, Zhimin, Ling, Rui	2020///		Clinical epidemiology	12	eng		917	924	10.2147/CLEP.S264349	BACKGROUND: Sentinel lymph node biopsy (SLNB) was introduced over 30 years ago, but the application of SLNB in China is unclear. This study aimed to explore the real-world implementation of SLNB among early-stage breast cancer patients in China. METHODS: A multi-center, retrospective study was conducted among primary breast cancer patients from 37 hospitals in China in 2018. Their clinical data w…			112
371	JOUR	Contribution of Glycation and Oxidative Stress to Thyroid Gland Pathology-A Pilot Study.	Kuzan, Aleksandra, KrÃ³lewicz, Emilia, Nowakowska, Karolina, Stach, Kamilla, Kaliszewski, Krzysztof, DomosÅawski, PaweÅ, Kotyra, Åukasz, Gamian, Andrzej, Kustrzeba-WÃ³jcicka, Irena	2021/04//		Biomolecules	11	eng	4			10.3390/biom11040557	The patho-mechanism of changes in the thyroid gland, including carcinogenesis, is a complex process, which involves oxidative stress. The goal of our investigation was to verify the extent of stress in the thyroid gland related to glycation. The study samples were comprised of blood sera, thyroid, and adipose tissue sections probed from 37 patients diagnosed with thyroid cancers and goiter. Using…			113
245	JOUR	Primary Burkitt's lymphoma of the thyroid without Epstein-Barr virus infection: A case report and literature review.	Zhang, Liying, Gao, Lanxiang, Liu, Guang, Wang, Luping, Xu, Chunwei, Li, Lin, Tian, Yuwang, Feng, Huiru, Guo, Zhe	2014/05//		Oncology letters	7	eng	5	1519	1524	10.3892/ol.2014.1941	Primary thyroid lymphomas are rare, and the majority are B-cell lymphoma. Primary Burkitt's lymphoma (BL) of the thyroid is much less common than the other types of lymphoma. The current study presents the case of an eight-year-old male with a mass in the right lobe of the thyroid, which was detected by B-ultrasound. The patient was diagnosed with BL by immunohistochemistry, fluorescence in situ …			114
474	JOUR	Thyroid-infiltrating T lymphocyte subsets in Hashimoto's thyroiditis.	Jansson, R, TÃ¶tterman, T H, SÃ¤llstrÃ¶m, J, Dahlberg, P A	1983/06//	Adult, Antibodies, Monoclonal, Biopsy, Needle, Cell Count, Female, Fluorescent Antibody Technique, Humans, Middle Aged, Phenotype, T-Lymphocytes, T-Lymphocytes, Helper-Inducer, T-Lymphocytes, Regulatory, Thyroid Gland, Thyroiditis, Autoimmune, immunology	The Journal of clinical endocrinology and metabolism	56	eng	6	1164	1168	10.1210/jcem-56-6-1164	In Hashimoto's thyroiditis, the thyroid gland is infiltrated with immunocompetent lymphocytes. In this study we have used the fine needle aspiration technique to obtain thyroid-infiltrating lymphocytes from 11 HT patients for surface marker studies. The cells were characterized using conventional T and B cell markers as well as monoclonal antibodies (OKT) to different T cell subsets in a microsca…			115
415	JOUR	Extramedullary plasmacytoma of the thyroid gland producing gamma heavy chain.	Matsubayashi, S, Tamai, H, Suzuki, T, Matsuzuka, F, Miyauchi, A, Kobayashi, N, Fukata, S, Kuma, K, Yanaihara, N, Nagataki, S	1985/06//	Aged, Fluorescent Antibody Technique, Heavy Chain Disease, Humans, Immunoelectrophoresis, Immunoglobulin gamma-Chains, Male, Plasmacytoma, Thyroid Neoplasms, complications, immunology, pathology	Endocrinologia japonica	32	eng	3	427	433	10.1507/endocrj1954.32.427	We encountered a 65-year-old man with gamma heavy chain disease associated with extramedullary plasmacytoma of the thyroid gland. Serum electrophoresis revealed an abnormal fast gamma band that cross-reacted with anti-IgG (Fc gamma) sera immunoelectrophoretically. Intracytoplasmic monoclonal immunoglobulin, IgG (Fc gamma), was demonstrated in thyroid tissue sections using an indirect immunofluore…			116
313	JOUR	Oncoplastic surgery combining partial mastectomy and immediate volume replacement using a thoracodorsal adipofascial cutaneous flap with a crescent-shaped dermis.	Kijima, Yuko, Yoshinaka, Heiji, Hirata, Munetsugu, Arima, Hideo, Nakajo, Akihiro, Shinden, Yoshiaki, Uenosono, Yoshikazu, Okumura, Hiroshi, Ishigami, Sumiya, Natsugoe, Shoji	2014/11//	Breast Neoplasms, Female, Humans, Mastectomy, Segmental, Middle Aged, Reconstructive Surgical Procedures, Surgical Flaps, Treatment Outcome, methods, surgery	Surgery today	44	eng	11	2098	2105	10.1007/s00595-013-0812-1	PURPOSE: The treatment of early breast cancer using breast-conserving therapy commonly ensures local control and acceptable cosmetic results. We herein report a useful technique, including the use of a thoracodorsal adipofascial cutaneous flap for reconstructing defects in the outer quadrant area after partial mastectomy, which achieved excellent results. METHODS: We performed partial mastectomy …			117
469	JOUR	MALIGNANT LYMPHOMA OF THE THYROID.	COX, M T	1964/11//	Autoantibodies, Complement Fixation Tests, Fluorescent Antibody Technique, Geriatrics, Hemagglutination, Hemagglutination Tests, Humans, Lymphoma, Lymphoma, Large B-Cell, Diffuse, Lymphoma, Non-Hodgkin, Neoplasm Metastasis, Neoplasms, Pathology, Precipitin Tests, Sarcoma, Surgical Procedures, Operative, Thyroid Neoplasms, Thyroiditis, Thyroiditis, Autoimmune	Journal of clinical pathology	17	eng	6	591	601	10.1136/jcp.17.6.591	Nine cases of malignant lymphoma of the thyroid are described; the clinical features and histological patterns are recorded and the latter related to results of serological tests for thyroid antibodies. The value of such tests in clinical assessment is discussed. The distribution of metastases and their predilection for the gastrointestinal tract is noted.			118
756	JOUR	The classification of pediatric and young adult renal cell carcinomas registered on the children's oncology group (COG) protocol AREN03B2 after focused genetic testing.	Cajaiba, Mariana M, Dyer, Lisa M, Geller, James I, Jennings, Lawrence J, George, David, Kirschmann, Dawn, Rohan, Stephen M, Cost, Nicholas G, Khanna, Geetika, Mullen, Elizabeth A, Dome, Jeffrey S, Fernandez, Conrad V, Perlman, Elizabeth J	2018/08//	Adolescent, Adult, Basic Helix-Loop-Helix Leucine Zipper Transcription Factors, Carcinoma, Renal Cell, Child, Child, Preschool, Female, Genetic Testing, Humans, In Situ Hybridization, Fluorescence, Infant, Male, Medical Oncology, Pediatrics, Translocation, Genetic, Young Adult, diagnosis, genetics, pathology, trends	Cancer	124	eng	16	3381	3389	10.1002/cncr.31578	BACKGROUND: Renal cell carcinomas (RCCs) are rare in young patients. Knowledge of their pathologic and molecular spectrum remains limited, and no prospective studies have been performed to date in this population. This study analyzes patients diagnosed with RCC who were prospectively enrolled in the AREN03B2 Children's Oncology Group (COG). The objective was to classify these tumors with the aid …			119
678	JOUR	The influence of radioiodine therapy on the number of circulating epithelial cells (CEC) in patients with differentiated thyroid carcinoma - a pilot study.	Winkens, T, Pachmann, K, Freesmeyer, M	2014/04//	Cell Count, Epithelial Cells, Humans, Iodine Radioisotopes, Microscopy, Fluorescence, Middle Aged, Neoplastic Cells, Circulating, Pilot Projects, Predictive Value of Tests, Sensitivity and Specificity, Statistics, Nonparametric, Thyroglobulin, Thyroid Neoplasms, blood, pathology, radiation effects, radiotherapy, therapeutic use	Experimental and clinical endocrinology & diabetes : official journal, German Society of Endocrinology [and] German Diabetes Association	122	eng	4	246	253	10.1055/s-0034-1370921	GOAL: The aim of this pilot study was to investigate the changes of circulating epithelial cells in the blood of patients with differentiated thyroid cancer after radioiodine-therapy with I-131. METHODS: The cells were detected by fluorescence-microscopy via the epithelial-cell-adhesion-molecule (EpCAM), a molecule described to be over-expressed in most carcinoma tissues and also present on circu…			120
311	JOUR	The usefulness of detecting thyroglobulin in fine-needle aspirates from patients with neck lesions using a sensitive thyroglobulin assay.	Sigstad, E, Heilo, A, Paus, E, Holgersen, K, GrÃ¸holt, K K, JÃ¸rgensen, L H, Bogsrud, T V, Berner, A, BjÃ¸ro, T	2007/12//	Biopsy, Fine-Needle, Fluorescent Antibody Technique, Direct, Head and Neck Neoplasms, Humans, Lymph Nodes, Lymphatic Metastasis, Sensitivity and Specificity, Thyroglobulin, Thyroid Neoplasms, analysis, diagnosis, metabolism, methods, pathology, surgery	Diagnostic cytopathology	35	eng	12	761	767	10.1002/dc.20726	The aim of this study was to assess the diagnostic utility of thyroglobulin (Tg) in fine needle aspirates (Tg-FNAB) of nonthyroidal neck masses using a sensitive in-house method for detecting Tg in washout specimens. A total of 256 samples from 145 patients were evaluated for Tg in washout specimen from FNAB and compared to corresponding cytological smear and histology of 46 surgical specimens. T…			121
418	JOUR	[Hashimoto's thyroiditis with intra-thyroid production of a monoclonal antithyroglobulin autoantibody].	Karsenty, G, Timsit, J, Casadevall, N, Dighiero, G, Tulliez, M, Mathiot, C, Thomsen, M, Joly, J, Luton, J P	1986///	Antibodies, Monoclonal, Autoantibodies, Fluorescent Antibody Technique, Humans, Immunoglobulin kappa-Chains, Male, Middle Aged, Thyroglobulin, Thyroid Gland, Thyroiditis, Autoimmune, analysis, immunology, pathology	Annales d'endocrinologie	47	fre	5	395	398		A 46-year old man had an Hashimoto's thyroiditis. The disease was particular by the voluminous goiter, associated with pressure symptoms and by the presence of a monoclonal Ig.G Kappa. Because of a possibly associated lymphoma of the thyroid, a total thyroidectomy was performed. Post-operative course showed a rapid and total disappearance of monoclonal Ig.G and antithyroglobulin autoantibodies. T…			122
13	JOUR	Novel iodinated gold nanoclusters for precise diagnosis of thyroid cancer.	Chen, Xin, Zhu, Huanhuan, Huang, Xin, Wang, Peisong, Zhang, Fulei, Li, Wei, Chen, Guang, Chen, Bingdi	2017/02//	Animals, Cell Line, Tumor, Chloramines, Gold, Humans, Metal Nanoparticles, Mice, Mice, Nude, Neoplasm Transplantation, Neoplasms, Experimental, Serum Albumin, Bovine, Spectrometry, Fluorescence, Thyroid Neoplasms, Tomography, X-Ray Computed, Tosyl Compounds, diagnosis, diagnostic imaging	Nanoscale	9	eng	6	2219	2231	10.1039/c6nr07656d	As the most common endocrine malignancy with a high incidence, thyroid cancer lacks a dual-modal imaging method for precise diagnosis. An accurate and multimodal imaging system is pivotal to solve this problem. Herein, dual-modality fluorescence/Computed Tomography (CT) iodinated gold nanoclusters for malignant thyroid cancer visualization have been recently fabricated. In this study, innovative …			123
228	JOUR	Detection of IDH1 and IDH2 mutations by fluorescence melting curve analysis as a diagnostic tool for brain biopsies.	Horbinski, Craig, Kelly, Lindsey, Nikiforov, Yuri E, Durso, Mary Beth, Nikiforova, Marina N	2010/07//	Base Sequence, Biopsy, Brain, DNA Mutational Analysis, DNA Primers, Fluorescence, Glioma, Humans, Isocitrate Dehydrogenase, Molecular Sequence Data, Mutation, Nucleic Acid Denaturation, Polymerase Chain Reaction, diagnosis, enzymology, genetics, metabolism, methods, pathology	The Journal of molecular diagnostics : JMD	12	eng	4	487	492	10.2353/jmoldx.2010.090228	Novel mutations in the isocitrate dehydrogenase 1 (IDH1) and 2 (IDH2) genes have been identified in a large proportion of diffuse gliomas. Tumors with IDH1/2 mutations have distinctive clinical characteristics, including a less aggressive course. The aim of this study was to develop and evaluate the performance of a novel real-time PCR and post-PCR fluorescence melting curve analysis assay for th…			124
521	JOUR	Theranostic near-infrared fluorescent nanoplatform for imaging and systemic siRNA delivery to metastatic anaplastic thyroid cancer.	Liu, Yanlan, Gunda, Viswanath, Zhu, Xi, Xu, Xiaoding, Wu, Jun, Askhatova, Diana, Farokhzad, Omid C, Parangi, Sareh, Shi, Jinjun	2016/07//	Animals, Female, Gene Silencing, HeLa Cells, Humans, Mice, Nude, Mice, SCID, Nanoparticles, Optical Imaging, Proto-Oncogene Proteins B-raf, RNA, Small Interfering, Theranostic Nanomedicine, Thyroid Carcinoma, Anaplastic, Thyroid Neoplasms, Xenograft Model Antitumor Assays, administration & dosage, adverse effects, chemistry, diagnostic imaging, genetics, methods, therapy	Proceedings of the National Academy of Sciences of the United States of America	113	eng	28	7750	7755	10.1073/pnas.1605841113	Anaplastic thyroid cancer (ATC), one of the most aggressive solid tumors, is characterized by rapid tumor growth and severe metastasis to other organs. Owing to the lack of effective treatment options, ATC has a mortality rate of â¼100% and median survival of less than 5 months. RNAi nanotechnology represents a promising strategy for cancer therapy through nanoparticle (NP) -mediated delivery of…			125
523	JOUR	Cytopathologic analysis of paratracheal masses: a study of 737 cases with clinicoradiologic correlation.	Barnett, Brad P, Sheth, Sheila, Ali, Syed Z	2009///	Adult, Aged, Aged, 80 and over, Biopsy, Fine-Needle, Contrast Media, Female, Humans, Male, Middle Aged, Tomography, X-Ray Computed, Tracheal Neoplasms, Young Adult, diagnosis, diagnostic imaging, pathology	Acta cytologica	53	eng	6	672	678	10.1159/000325409	OBJECTIVE: To analyze the cytopathologic findings of a series of paratracheal space (PTS) masses in the context of clinicoradiologic correlation. STUDY DESIGN: Retrospective review of our cytopathology files revealed 131 cases of PTS lesions in a 14-year period (1991-2005). Cytologic material was obtained under radiologic guidance. Radiologic findings, clinical data and subsequently performed tis…			126
658	JOUR	Extraskeletal myxoid chondrosarcoma with non-EWSR1-NR4A3 variant fusions correlate with rhabdoid phenotype and high-grade morphology.	Agaram, Narasimhan P, Zhang, Lei, Sung, Yun-Shao, Singer, Samuel, Antonescu, Cristina R	2014/05//	Adult, Aged, Aged, 80 and over, Calmodulin-Binding Proteins, Chondrosarcoma, DNA-Binding Proteins, Female, Humans, Male, Middle Aged, Neoplasms, Connective and Soft Tissue, New York, Oncogene Proteins, Fusion, RNA-Binding Protein EWS, RNA-Binding Proteins, Receptors, Steroid, Receptors, Thyroid Hormone, Sarcoma, epidemiology, genetics, mortality, pathology	Human pathology	45	eng	5	1084	1091	10.1016/j.humpath.2014.01.007	Extraskeletal myxoid chondrosarcomas (EMC) are rare soft tissue sarcomas with distinctive histology and uncertain histogenesis, characterized by Ewing sarcoma breakpoint region 1-nuclear receptor subfamily 4, group A, member 3 (EWSR1-NR4A3) fusion in 75% of the cases. A smaller proportion of cases show NR4A3 fused to other gene partners including TATA binding protein-associated factor 15 (TAF15),…			127
265	JOUR	Clinical, genetic, and immunohistochemical characterization of 70 Ukrainian adult cases with post-Chornobyl papillary thyroid carcinoma.	Dinets, Andrii, Hulchiy, Mykola, Sofiadis, Anastasios, Ghaderi, Mehran, HÃ¶Ã¶g, Anders, Larsson, Catharina, Zedenius, Jan	2012/06//	Adult, Aged, Biomarkers, Tumor, Carcinoma, Papillary, Chernobyl Nuclear Accident, Cohort Studies, Cyclin A, Cyclin D1, Female, Gene Rearrangement, Humans, Immunohistochemistry, In Situ Hybridization, Fluorescence, Ki-67 Antigen, Male, Middle Aged, Mutation, Neoplasms, Radiation-Induced, Nuclear Receptor Coactivators, Patched Receptors, Phenotype, Proto-Oncogene Proteins B-raf, Proto-Oncogene Prot…	European journal of endocrinology	166	eng	6	1049	1060	10.1530/EJE-12-0144	BACKGROUND: Increased incidence of papillary thyroid carcinoma (PTC) is observed as a consequence of radiation exposure in connection to the Chornobyl nuclear plant accident in 1986. In this study, we report a cohort of adult Ukrainian patients diagnosed with PTC from 2004 to 2008 following exposure at the age of 18 years or younger. METHODS: In total, 70 patients were identified and clinically c…			128
162	JOUR	Cytogenetic effects of radioiodine therapy: a 20-year follow-up study.	Livingston, Gordon K, Khvostunov, Igor K, Gregoire, Eric, Barquinero, Joan-Francesc, Shi, Lin, Tashiro, Satoshi	2016/05//	Adult, Carcinoma, Carcinoma, Papillary, Chromosome Aberrations, Cytogenetic Analysis, Follow-Up Studies, Humans, In Situ Hybridization, Fluorescence, Iodine Radioisotopes, Karyotype, Male, Micronucleus Tests, Radiation Injuries, Risk Assessment, Thyroid Cancer, Papillary, Thyroid Neoplasms, Thyroidectomy, adverse effects, genetics, radiation effects, radiotherapy, surgery, therapeutic use	Radiation and environmental biophysics	55	eng	2	203	213	10.1007/s00411-016-0647-4	The purpose of this study was to compare cytogenetic data in a patient before and after treatment with radioiodine to evaluate the assays in the context of biological dosimetry. We studied a 34-year-old male patient who underwent a total thyroidectomy followed by ablation therapy with (131)I (19.28 GBq) for a papillary thyroid carcinoma. The patient provided blood samples before treatment and the…			129
88	JOUR	Ketogenic diet combined with antioxidant N-acetylcysteine inhibits tumor growth in a mouse model of anaplastic thyroid cancer.	Aggarwal, Abha, Yuan, Zuliang, Barletta, Justine A, Lorch, Jochen H, Nehs, Matthew A	2020/01//	Acetylcysteine, Administration, Oral, Animals, Cell Line, Tumor, Diet, Ketogenic, Female, Free Radical Scavengers, Glucose, Humans, Mice, Oxidative Stress, Reactive Oxygen Species, Thyroid Carcinoma, Anaplastic, Thyroid Neoplasms, Xenograft Model Antitumor Assays, administration & dosage, drug effects, metabolism, pathology, therapy	Surgery	167	eng	1	87	93	10.1016/j.surg.2019.06.042	BACKGROUND: Anaplastic thyroid cancer is an aggressive and fatal malignancy. Many advanced cancers are characterized by glucose dependency, leading to oxidative stress and cellular proliferation. Therefore, we sought to determine if a low glucose environment (inÂ vitro) or a ketogenic diet (inÂ vivo) could inhibit anaplastic thyroid cancer tumor growth when combined with the antioxidant N-acetylc…			130
314	JOUR	Variations in MALT1 Gene Disruptions Detected by FISH in 109 MALT Lymphomas Occurring in Different Primary Sites.	Mulligan, Shannon, Hu, P, Murphy, A, Han, J, Tam, M, Lin, P, Konoplev, S, Lennon, P A	2011///		Journal of the Association of Genetic Technologists	37	eng	2	76	79		Mucosa-associated lymphoid tissue (MALT) lymphoma is a type of B-cell non-Hodgkin lymphoma that can originate in the gastrointestinal (GI) tract, thyroid, breasts, lungs, and skin. The most common genetic abnormality occurring in MALT lymphomas involves t(11;18)(q21;q21) in the gene MALT1. This translocation results in a chimeric fusion product between the genes ATI2 and MALT1, which generates a …			131
267	JOUR	Underexpression of peroxisome proliferator-activated receptor (PPAR)gamma in PAX8/PPARgamma-negative thyroid tumours.	Marques, A R, Espadinha, C, Frias, M J, Roque, L, Catarino, A L, Sobrinho, L G, Leite, V	2004/08//	Adenocarcinoma, Follicular, Carcinoma, Papillary, Cell Transformation, Neoplastic, Disease Progression, Gene Expression Profiling, Humans, Immunohistochemistry, In Situ Hybridization, Fluorescence, Neoplasm Invasiveness, Receptors, Cytoplasmic and Nuclear, Reverse Transcriptase Polymerase Chain Reaction, Thyroid Diseases, Thyroid Gland, Thyroid Neoplasms, Transcription Factors, Up-Regulation, bio…	British journal of cancer	91	eng	4	732	738	10.1038/sj.bjc.6601989	The expression of peroxisome proliferator-activated receptor (PPAR)gamma in thyroid neoplasias and in normal thyroid (NT) tissues has not been fully investigated. The objectives of the present work were: to study and compare the relative expression of PPARgamma in normal, benign and malignant thyroid tissues and to correlate PPARgamma immunostaining with clinical/pathological features of patients…			132
373	JOUR	Parathyroid hormone-dependent endocytosis of renal type IIc Na-Pi cotransporter.	Segawa, Hiroko, Yamanaka, Setsuko, Onitsuka, Akemi, Tomoe, Yuka, Kuwahata, Masashi, Ito, Mikiko, Taketani, Yutaka, Miyamoto, Ken-ichi	2007/01//	Animals, Blotting, Northern, Cell Membrane, Endocytosis, Immunohistochemistry, Kidney, Lysosomes, Male, Microscopy, Fluorescence, Microtubules, Microvilli, Parathyroid Hormone, Parathyroidectomy, Peptide Fragments, Phosphates, RNA, Rats, Rats, Wistar, Sodium-Phosphate Cotransporter Proteins, Type IIa, Thyroidectomy, biosynthesis, drug effects, genetics, metabolism, pharmacology, physiology	American journal of physiology. Renal physiology	292	eng	1	F395	403	10.1152/ajprenal.00100.2006	Hereditary hypophosphatemic rickets with hypercalciuria results from mutations of the renal type IIc Na-P(i) cotransporter gene, suggesting that the type IIc transporter plays a prominent role in renal phosphate handling. The goal of the present study was to investigate the regulation of the type IIc Na-P(i) cotransporter by parathyroid hormone (PTH). Type IIc Na-P(i) cotransporter levels were ma…			133
457	JOUR	Intermediate lymphocytic lymphoma of the thyroid. An immunologic and immunohistologic study.	Aozasa, K, Inoue, A, Yoshimura, H, Katagiri, S, Katayama, S, Matsuzuka, F, Yonezawa, T	1986/05//	Antibodies, Monoclonal, Female, Fluorescent Antibody Technique, Histocytochemistry, Humans, Immunoglobulin kappa-Chains, Immunoglobulin lambda-Chains, Lymphocytes, Lymphoma, Male, Middle Aged, Monocytes, Receptors, Antigen, B-Cell, Thyroid Neoplasms, analysis, classification, immunology, pathology, surgery	Cancer	57	eng	9	1762	1767	10.1002/1097-0142(19860501)57:9<1762::aid-cncr2820570909>3.0.co;2-6	Four cases of thyroid lymphomas are presented showing curious histologic difficult to distinguish from severe lymphocytic thyroiditis by routine histologic study alone. The age of the patients ranged from 39 to 63 years. Three female patients suffered from autoimmune (lymphocytic) thyroiditis for 2 to 20 years until the present illness. A male patient had no history of thyroiditis. Rapid growth o…			134
130	JOUR	Human exposure to bisphenol AF and diethylhexylphthalate increases susceptibility to develop differentiated thyroid cancer in patients with thyroid nodules.	Marotta, Vincenzo, Russo, Giacomo, Gambardella, Claudio, Grasso, Marica, La Sala, Domenico, Chiofalo, Maria Grazia, D'Anna, Raffaella, Puzziello, Alessandro, Docimo, Giovanni, Masone, Stefania, Barbato, Francesco, Colao, Annamaria, Faggiano, Antongiulio, Grumetto, Lucia	2019/03//	Adult, Benzhydryl Compounds, Chlorobenzenes, Chromatography, High Pressure Liquid, Diethylhexyl Phthalate, Endocrine Disruptors, Environmental Pollutants, Female, Humans, Male, Middle Aged, Phenols, Phthalic Acids, Thyroid Neoplasms, Thyroid Nodule, blood, chemically induced, toxicity	Chemosphere	218	eng		885	894	10.1016/j.chemosphere.2018.11.084	Pollutants represent potential threats to the human health, being ubiquitous in the environment and exerting toxicity even at low doses. This study aims at investigating the role of fifteen multiclass organic pollutants, assumed as markers of environmental pollution, most of which exerting endocrine-disrupting activity, in thyroid cancer development. The increasing incidence of differentiated thy…			135
698	JOUR	Determination of thyrotropin in serum by time-resolved fluoroimmunoassay evaluated.	Kaihola, H L, Irjala, K, Viikari, J, NÃ¤ntÃ¶, V	1985/10//	Adult, Female, Fluorescent Antibody Technique, Humans, Hyperthyroidism, Male, Middle Aged, Reagent Kits, Diagnostic, Reference Values, Thyroid Neoplasms, Thyrotropin, Time Factors, blood	Clinical chemistry	31	eng	10	1706	1709		We evaluated a new, highly sensitive time-resolved fluoroimmunoassay for thyrotropin (TSH) in serum. This direct immunometric "sandwich"-type assay involves two monoclonal antibodies against TSH, one immobilized, the other labeled with europium. Extremely high specific activity of the label and the use of labeled antibody in large excess make the method sensitive enough to measure TSH values fall…			136
621	JOUR	Activity of sunitinib in extraskeletal myxoid chondrosarcoma.	Stacchiotti, S, Pantaleo, M A, Astolfi, A, Dagrada, G P, Negri, T, Dei Tos, A P, Indio, V, Morosi, C, Gronchi, A, Colombo, C, Conca, E, Toffolatti, L, Tazzari, M, Crippa, F, Maestro, R, Pilotti, S, Casali, P G	2014/06//	Adult, Aged, Angiogenesis Inhibitors, Antineoplastic Agents, Bone Neoplasms, Calmodulin-Binding Proteins, Chondrosarcoma, DNA-Binding Proteins, Drug Resistance, Neoplasm, Female, Gene Rearrangement, Genotype, Humans, Indoles, Male, Middle Aged, Neoplasms, Connective and Soft Tissue, Phenotype, Proto-Oncogene Proteins c-kit, Proto-Oncogene Proteins c-ret, Pyrroles, RNA-Binding Protein EWS, RNA-Bin…	European journal of cancer (Oxford, England : 1990)	50	eng	9	1657	1664	10.1016/j.ejca.2014.03.013	BACKGROUND: Extraskeletal myxoid chondrosarcoma (EMC) is a rare soft tissue sarcoma, marked by NR4A3 rearrangement. Herein we report on the activity of sunitinib in a series of 10 patients, strengthening what initially observed in two cases. PATIENTS AND METHODS: From July 2011, 10 patients with progressive metastatic translocated EMC have been consecutively treated with sunitinib 37.5mg/day, on …			137
355	JOUR	Images in endocrine pathology: a starry-sky in the thyroid.	Bongiovanni, Massimo, Mazzucchelli, Luca, Martin, Vittoria, Crippa, Stefano, Bolli, Martin, Suriano, Sergio, Giovanella, Luca	2012/03//	Aged, Biopsy, Fine-Needle, Burkitt Lymphoma, Female, Genes, myc, Humans, In Situ Hybridization, Fluorescence, Multimodal Imaging, Positron-Emission Tomography, Thyroid Neoplasms, Tomography, X-Ray Computed, Translocation, Genetic, diagnostic imaging, genetics, pathology	Endocrine pathology	23	eng	1	79	81	10.1007/s12022-011-9191-6				138
526	JOUR	Her2/neu overexpression in differentiated thyroid carcinomas predicts metastatic disease.	Kremser, R, Obrist, P, Spizzo, G, Erler, H, Kendler, D, Kemmler, G, Mikuz, G, Ensinger, C	2003/04//	Adenocarcinoma, Follicular, Carcinoma, Papillary, Cell Count, Female, Humans, Immunohistochemistry, In Situ Hybridization, Fluorescence, Male, Receptor, ErbB-2, Retrospective Studies, Single-Blind Method, Thyroid Neoplasms, genetics, metabolism, pathology, secondary, surgery	Virchows Archiv : an international journal of pathology	442	eng	4	322	328	10.1007/s00428-003-0769-3	To investigate the prognostic value of Her2/neu expression in differentiated thyroid carcinomas 103 patients were retrospectively investigated. All of them received surgical and an identical follow-up treatment. The patients with papillary and follicular thyroid cancer were further separated into two groups concerning their clinical development, including one group without distant metastasis (fol…			139
248	GEN	Primary synovial sarcoma of the thyroid gland: case report and review of the literature.	Boudin, Laurys, Fakhry, Nicolas, Chetaille, Bruno, Perrot, Delphine, Nguyen, Anh Tuan, Daidj, Nassima, Guiramand, JÃ©rÃ´me, Sarran, Anthony, Moureau-Zabotto, Laurence, Bertucci, FranÃ§ois	2014/01//		Case reports in oncology	7	eng	1	6	13	10.1159/000357913	Synovial sarcoma (SVS) of the thyroid gland is exceedingly rare. We report the case of a 55-year-old man with a rapidly growing 7-cm neck mass. Because of suspicion of anaplastic thyroid carcinoma, a total thyroidectomy was planned, without preoperative cytology. During surgery, the tumor ruptured, leading to fragmented and incomplete resection. The morphological and immunohistochemical aspects s…			140
139	JOUR	Hyperspectral imaging fluorescence excitation scanning spectral characteristics of remodeled mouse arteries.	Deal, Joshua, McFarland, Stuart J, Robinson, Anna, Alford, Anna, Weber, David S, Rich, Thomas C, Leavesley, Silas J	2019/02//		Proceedings of SPIE--the International Society for Optical Engineering	10890	eng				10.1117/12.2510770	Coronary artery disease (CAD), or atherosclerosis, is responsible for nearly a third of all American deaths annually. Detection of plaques and differentiation of plaque stage remains a complicating factor for treatment. Classification of plaque before significant blockage or rupture could inform clinical decisions and prevent mortality. Current detection methods are either nonspecific, slow, or r…			141
563	JOUR	Intra-articular Extraskeletal EWSR1-Negative NR4A3-Positive Myxoid Chondrosarcoma: A Case Report.	Lal, Divakar N, El-Zammar, Ola, Naous, Rana, Damron, Timothy A	2020///	Chondrosarcoma, DNA-Binding Proteins, Humans, Knee, Magnetic Resonance Imaging, Male, Middle Aged, Neoplasms, Connective and Soft Tissue, RNA-Binding Protein EWS, Receptors, Steroid, Receptors, Thyroid Hormone, Surgical Flaps, diagnostic imaging, genetics, pathology, surgery	JBJS case connector	10	eng	2	e0614	e0614	10.2106/JBJS.CC.19.00614	CASE: Extraskeletal myxoid chondrosarcomas (EMCs) are rare soft-tissue malignancies. Intra-articular occurrence is even more rare. To our knowledge, this case is one of only 2 reported intra-articular EMC cases of the knee free of local recurrence and/or amputation at follow-up. This case is also distinctive for being fluorescence in-situ hybridization-negative for the typical EMC-balanced transl…			142
465	JOUR	Function of DR-positive thyrocytes from patients with Graves' disease: quantitative analysis of thyroid peroxidase content by fluorescent photometry.	Asakawa, H, Hanafusa, T, Kuma, K, Kono, N, Tarui, S	1992/03//	Adult, Female, Fluorescent Antibody Technique, Graves Disease, HLA-DR Antigens, Humans, Immunohistochemistry, Iodide Peroxidase, Lymphocytes, Male, Thyroid Gland, analysis, enzymology, immunology, metabolism, surgery	The Journal of clinical endocrinology and metabolism	74	eng	3	614	618	10.1210/jcem.74.3.1740495	A considerable number of thyrocytes in patients with autoimmune thyroiditis ectopically express HLA-DR antigen. Furthermore, it has been reported that interferon-gamma-induced DR-positive thyrocytes in vitro secrete less thyroid hormone in response to TSH stimulation compared with DR-negative ones. However, the function of the intrinsically DR-positive thyrocytes is unknown. To evaluate their fun…			143
734	GEN	A Case of Mixed Gonadal Dysgensis: A Diagnostic Challenge.	Saikia, Uma Kaimal, Sarma, Dipti, Das, Darvin Vamadevan, Goswami, J K, Kaushik, Saikia, Chandan, Nair, Abilash	2019///		Journal of human reproductive sciences	12	eng	2	169	172	10.4103/jhrs.JHRS_100_18	A 2-year-old child reared as a girl child was brought by parents with ambiguous genitalia noticed since birth. There was no history of failure to thrive or salt-losing crisis. On examination, the child had normal height and weight with normal blood pressure and no dysmorphism or Turners stigmata with external genitalia Prader Score 2. Ultrasound of the pelvis revealed hypoplastic uterus with no g…			144
387	JOUR	The efficiency of oxidative phosphorylation and the rapid control by thyroid hormone of nicotinamide nucleotide reduction and transhydrogenation in intact rat liver mitochondria.	Corrigall, J, Tselentis, B S, Mowbray, J	1984/06//	Adenosine Diphosphate, Animals, Glutathione Peroxidase, Male, Mitochondria, Liver, NAD, NADP, Oxidation-Reduction, Oxidative Phosphorylation, Rats, Thyroid Hormones, Thyroidectomy, Triiodothyronine, drug effects, metabolism, pharmacology, physiology	European journal of biochemistry	141	eng	2	435	440	10.1111/j.1432-1033.1984.tb08210.x	In confirmation of previous work enhancement of the fluorescence emission of reduced nicotinamide nucleotides in intact rat liver mitochondria was found to depend on incubation conditions. Under standard conditions the enhancement is constant at 4.8-fold in states 3 and 4 and is not altered by thyroidectomy of the animal 6 weeks prior to experiment. The ADP-induced (state 4----state 3----state 4)…			145
411	JOUR	The influence of nanomolar calcium ions and physiological levels of thyroid hormone on oxidative phosphorylation in rat liver mitochondria. A possible signal amplification control mechanism.	Thomas, W E, Crespo-Armas, A, Mowbray, J	1987/10//	Adenosine Diphosphate, Animals, Calcium, Hypothyroidism, Male, Mitochondria, Liver, Oxidative Phosphorylation, Rats, Rats, Inbred Strains, Serum Albumin, Bovine, Thyroidectomy, Triiodothyronine, drug effects, metabolism, pharmacology	The Biochemical journal	247	eng	2	315	320	10.1042/bj2470315	Using different conditions mitochondria from hypothyroid rats can show both unchanged ADP/O ratios and lowered ADP/O ratios without evidence of uncoupling when compared with euthyroid controls. Raising the free Ca2+ concentration to around 25 nM progressively lowered the ADP/O ratio in hypothyroid but not in euthyroid mitochondria. Ruthenium Red did not alter this behaviour and further increasing…			146
298	JOUR	X chromosome monosomy: a common mechanism for autoimmune diseases.	Invernizzi, Pietro, Miozzo, Monica, Selmi, Carlo, Persani, Luca, Battezzati, Pier Maria, Zuin, Massimo, Lucchi, Simona, Meroni, Pier Luigi, Marasini, Bianca, Zeni, Silvana, Watnik, Mitchell, Grati, Francesca R, Simoni, Giuseppe, Gershwin, M Eric, Podda, Mauro	2005/07//	Adult, Aged, Aged, 80 and over, Autoimmune Diseases, B-Lymphocytes, Case-Control Studies, Chimera, Chromosomes, Human, X, Chromosomes, Human, Y, Female, Graves Disease, Humans, In Situ Hybridization, Fluorescence, In Vitro Techniques, Middle Aged, Monosomy, Scleroderma, Systemic, Sex Characteristics, Sex Chromosome Aberrations, T-Lymphocytes, Thyroiditis, Autoimmune, genetics, ultrastructure	Journal of immunology (Baltimore, Md. : 1950)	175	eng	1	575	578	10.4049/jimmunol.175.1.575	The majority of human autoimmune diseases are characterized by female predominance. Although sex hormone influences have been suggested to explain this phenomenon, the mechanism remains unclear. In contrast to the role of hormones, it has been suggested, based on pilot data in primary biliary cirrhosis, that there is an elevation of monosomy X in autoimmune disease. Using peripheral white blood c…			147
477	JOUR	Human thyroid C cells: occurrence and amine formation studied by perfusion of surgically removed goitrous glands.	Englund, N E, Nilsson, G, Owman, C, Sundler, F	1972/07//	Adult, Aged, Biopsy, Calcitonin, Dopamine, Female, Fluorometry, Goiter, Goiter, Nodular, Humans, Hyperthyroidism, Microscopy, Fluorescence, Middle Aged, Perfusion, Staining and Labeling, Thyroid Gland, analysis, biosynthesis, metabolism, pathology, surgery	The Journal of clinical endocrinology and metabolism	35	eng	1	90	96	10.1210/jcem-35-1-90				148
403	JOUR	High endothelial venules present in lymphoid cell accumulations in thyroids affected by autoimmune disease: a study in men and BB rats of functional activity and development.	Kabel, P J, Voorbij, H A, de Haan-Meulman, M, Pals, S T, Drexhage, H A	1989/04//	Adult, Animals, Antibodies, Monoclonal, Autoantibodies, B-Lymphocytes, Cell Adhesion, Disease Models, Animal, Endothelium, Endothelium, Lymphatic, Epitopes, Female, Fluorescent Antibody Technique, Graves Disease, Humans, Lymphoid Tissue, Male, Rats, Rats, Inbred Strains, Receptors, Immunologic, Receptors, Lymphocyte Homing, T-Lymphocytes, Thyroid Gland, Thyroiditis, Autoimmune, analysis, immunolo…	The Journal of clinical endocrinology and metabolism	68	eng	4	744	751	10.1210/jcem-68-4-744	High endothelial venules (HEVs) derive their name from the cuboidal high walled shape of the endothelial cells and are found in T-cell areas of a wide variety of lymphoid tissues. The function of HEVs is to attract lymphocytes to lymphoid tissues, and they are thus of importance in lymphocyte recirculation. We investigated the immunohistochemical presence and localization of HEVs in thyroid tissu…			149
368	JOUR	[Effects of electroacupuncture on the activities of gliocytes of cervical spinal cord in rats with thyroid incisional pain].	Yang, Yongsheng, Qiao, Lina, Wang, Junying, Chen, Shuping, Tan, Lianhong, Liu, Junling	2016/07//	Acupuncture Points, Animals, Astrocytes, Cervical Cord, Electroacupuncture, Humans, Male, Microglia, Pain Threshold, Pain, Procedural, Random Allocation, Rats, Rats, Sprague-Dawley, Rats, Wistar, Spinal Cord, Thyroid Gland, cytology, etiology, metabolism, methods, physiology, surgery, therapy	Zhongguo zhen jiu = Chinese acupuncture & moxibustion	36	chi	7	727	733	10.13703/j.0255-2930.2016.07.014	OBJECTIVE: To observe the impacts of electroacupuncture (EA) on microgliacytes and astrocytes of cervical spinal cord in rats with thyroid incisional pain and explore the mechanism of acupuncture anesthesia in thyroid surgery. METHODS: Sixty Wistar male rats were randomized into a normal group, a model group, a Futu (LI 18) group, a Hegu (LI 4)-Neiguan (PC 6) group and a Zusanli (ST 36)-Yanglingq…			150
381	JOUR	Flow cytometry phenotypization of thyroidal lymphoid infiltrate and functional status in Hashimoto's thyroiditis.	Zeppa, Pio, Marino, Gilda, Lepore, Maria, Troncone, Giancarlo, Lupoli, Gelsy A, Biondi, Bernadette, Picardi, Marco, Pane, Fabrizio, Vetrani, Antonio, Palombini, Lucio	2006/06//	Adult, Aged, Antigens, CD, B-Lymphocytes, Female, Flow Cytometry, Hashimoto Disease, Humans, Immunoglobulin kappa-Chains, Immunoglobulin lambda-Chains, Lymphoid Tissue, Male, Middle Aged, T-Lymphocytes, Thyroid Function Tests, Thyroid Gland, Thyrotropin, Thyroxine, Triiodothyronine, blood, immunology, metabolism, pathology, physiopathology	Analytical and quantitative cytology and histology	28	eng	3	148	156		OBJECTIVE: To evaluate the thyroidal lymphoid infiltrate (TLI) in thyroidal functional status (TFS) for differences among patients with Hashimoto's thyroiditis (HT). STUDY DESIGN: Flow-cytometry (FC) was applied to thyroidal fine-needle cytology samples in 57 patients. TLI was analyzed using a fluorescence-activated cell sorter (FACS) scan and fluorescence antibodies CD3, CD4, CD5, CD8, CD10, and…			151
620	JOUR	Detection of vasopressin cell antibodies in some patients with autoimmune endocrine diseases without overt diabetes insipidus.	De Bellis, A, Bizzarro, A, Amoresano Paglionico, V, Di Martino, S, Criscuolo, T, Sinisi, A A, Lombardi, G, Bellastella, A	1994/02//	Adolescent, Adult, Arginine Vasopressin, Autoantibodies, Autoimmune Diseases, Child, Diabetes Insipidus, Diabetes Mellitus, Type 1, Female, Fluorescent Antibody Technique, Humans, Hypothalamus, Male, Middle Aged, Pituitary Function Tests, Thyroid Diseases, blood, immunology, physiopathology	Clinical endocrinology	40	eng	2	173	177	10.1111/j.1365-2265.1994.tb02464.x	OBJECTIVE: Cytoplasmic autoantibodies to vasopressin cells (AVP) have been detected in patients with idiopathic central diabetes insipidus and only in one patient with endocrine autoimmune diseases without clinical diabetes insipidus. The aim of this study was to look for AVP cell antibodies (AVP-cell-Ab) in human sera of a large population of autoimmune endocrine disease patients without diabete…			152
696	JOUR	In vitro and in vivo reversal of thyroid epithelial polarity: its relevance for autoimmune thyroid disease.	Hanafusa, T, Pujol-Borrell, R, Chiovato, L, Doniach, D, Bottazzo, G F	1984/09//	Antigens, Surface, Autoantigens, Autoimmune Diseases, Culture Techniques, Epithelium, Fluorescent Antibody Technique, Goiter, Nodular, Graves Disease, Humans, Microscopy, Electron, Microsomes, Microvilli, Thyroid Diseases, Thyroid Gland, immunology, ultrastructure	Clinical and experimental immunology	57	eng	3	639	646		A method is described for culturing intact human thyroid follicles, based on the study of 40 thyroidectomy specimens from normal (n = 18) and diseased glands (n = 22). Reversal of the normal polarity of thyrocytes, whereby the microvilli move from the colloid edge to the vascular pole of the cells, occurs gradually when the amount of fetal calf serum (FCS) is changed from 0.5% to 10%. The translo…			153
79	JOUR	Nuclear NR4A3 Immunostaining Is a Specific and Sensitive Novel Marker for Acinic Cell Carcinoma of the Salivary Glands.	Haller, Florian, SkÃ¡lovÃ¡, Alena, Ihrler, Stephan, MÃ¤rkl, Bruno, Bieg, Matthias, Moskalev, Evgeny A, Erber, Ramona, Blank, Susanne, Winkelmann, Christa, Hebele, Simone, BanÄÄkovÃ¡, Martina, Wiemann, Stefan, MÃ¼ller, Sarina, Zenk, Johannes, Eils, Roland, Iro, Heinrich, Hartmann, Arndt, Agaimy, Abbas	2019/09//	Adult, Aged, Aged, 80 and over, Biomarkers, Tumor, Carcinoma, Acinar Cell, DNA-Binding Proteins, Diagnosis, Differential, Female, Humans, Immunohistochemistry, Male, Middle Aged, Receptors, Steroid, Receptors, Thyroid Hormone, Salivary Gland Neoplasms, Sensitivity and Specificity, Young Adult, analysis, biosynthesis, diagnosis	The American journal of surgical pathology	43	eng	9	1264	1272	10.1097/PAS.0000000000001279	Recently, we discovered the recurrent genomic rearrangement [t(4;9)(q13;q31)] enabling upregulation of the transcription factor Nuclear Receptor Subfamily 4 Group A Member 3 (NR4A3) through enhancer hijacking as the oncogenic driver event in acinic cell carcinoma (AciCC) of the salivary glands. In the current study, we evaluated the usefulness of NR4A3 immunostaining and NR4A3 fluorescence in sit…			154
606	JOUR	Transiently decreased sialylation of thyrotropin (TSH) in a patient with the euthyroid sick syndrome.	Magner, J, Roy, P, Fainter, L, Barnard, V, Fletcher, P Jr	1997/02//	Chromatography, Affinity, Electrophoresis, Polyacrylamide Gel, Euthyroid Sick Syndromes, Female, Fluorescent Dyes, Glycoside Hydrolases, Humans, Image Processing, Computer-Assisted, Middle Aged, Oligosaccharides, Sialic Acids, Thyroid Function Tests, Thyrotropin, biosynthesis, chemistry, drug therapy, metabolism, urine	Thyroid : official journal of the American Thyroid Association	7	eng	1	55	61	10.1089/thy.1997.7.55	A 60-year old woman was admitted to the medical intensive care unit with respiratory distress and worsening renal function, and was found to have bilateral renal artery occlusion. Aggressive nutrition per nasogastric tube was begun on day 8 of her illness, and she eventually recovered after bilateral renal artery bypass surgery, which was performed on day 15. She developed the euthyroid sick synd…			155
295	JOUR	10Â % fluorescein sodium vs 1Â % isosulfan blue in breast sentinel lymph node biopsy.	Ren, Lidong, Liu, Zhao, Liang, Mengdi, Wang, Li, Song, Xingli, Wang, Shui	2016/11//	Animals, Breast Neoplasms, Coloring Agents, Feasibility Studies, Female, Fluorescein, Fluorescent Dyes, Injections, Subcutaneous, Rabbits, Rosaniline Dyes, Sentinel Lymph Node Biopsy, administration & dosage, methods, pathology	World journal of surgical oncology	14	eng	1	280	280	10.1186/s12957-016-1031-1	BACKGROUND: Sentinel lymph node biopsy (SLNB) is well accepted to be a standard procedure in breast cancer surgery with clinically negative lymph nodes. Isosulfan blue is the first dye approved by the USA Food and Drug Administration for the localization of the lymphatic system. Few alternative tracers have been investigated. In this study, we aimed to compare the differences between 10Â % fluore…			156
186	JOUR	Correlation Between HER-2 Gene Amplification or Protein Expression and Clinical Pathological Features of Breast Cancer.	Shi, Pengfei, Chen, Cheng, Yao, Yufeng	2019/02//	Adult, Aged, Breast Neoplasms, Female, Gene Amplification, Humans, Middle Aged, Receptor, ErbB-2, genetics, metabolism, pathology	Cancer biotherapy & radiopharmaceuticals	34	eng	1	42	46	10.1089/cbr.2018.2576	OBJECTIVE: The incidence of breast cancer in females is gradually increasing. Expression of HER-2 gene and protein is critical for predicting the prognosis of breast cancer. This study examined amplification of HER-2 gene and protein expression in breast cancer patients to analyze their correlation with clinical and pathological features. MATERIALS AND METHODS: Specimens of breast gland tissues w…			157
539	JOUR	Treatment of anaplastic thyroid carcinoma in vitro with a mutant vaccinia virus.	Lin, Shu-Fu, Yu, Zhenkun, Riedl, Christopher, Woo, Yanghee, Zhang, Qian, Yu, Yong A, Timiryasova, Tatyana, Chen, Nanhai, Shah, Jatin P, Szalay, Aladar A, Fong, Yuman, Wong, Richard J	2007/12//	Carcinoma, Cell Division, Cell Line, Tumor, Galactosides, Green Fluorescent Proteins, Humans, In Vitro Techniques, Indoles, Luciferases, Mutagenesis, Oncolytic Virotherapy, Thyroid Neoplasms, Vaccinia virus, Virus Replication, beta-Galactosidase, genetics, growth & development, methods, therapy	Surgery	142	eng	6	976	983	10.1016/j.surg.2007.09.017	BACKGROUND: Anaplastic thyroid carcinoma (ATC) is a fatal disease resistant to all conventional treatments. Novel therapies are needed to improve dismal outcomes. METHODS: A replication-competent vaccinia virus (GLV-1h68) was engineered by inserting expression cassettes encoding Renilla luciferase-green fluorescent protein (GFP), beta-galactosidase, and beta-glucuronidase into the genome of LIVP …			158
694	JOUR	A Brief Introduction to Porphyrin Compounds used in Tumor Imaging and Therapies.	Pan, Lili, Ma, Yu, Wu, Xiaoai, Cai, Huawei, Qin, Feng, Wu, Haoxing, Li, Yun Chun, Jia, Zhiyun	2021///		Mini reviews in medicinal chemistry	21	eng	11	1303	1313	10.2174/1389557520999201209212745	As a group of heterocyclic macrocycle organic natural compounds occurring universally in animal tissues and plants, porphyrins are composed of four modified pyrrole subunits. Porphyrin analogues/ derivatives possess multiple biochemical properties because of their unique structures and have been extensively investigated in cancer treatment. Studies have shown that porphyrins and their derivatives…			159
300	JOUR	Stem cell antigen 1-positive mesenchymal cells are the origin of follicular cells during thyroid regeneration.	Okamoto, Minoru, Hayase, Suguru, Miyakoshi, Masaaki, Murata, Tsubasa, Kimura, Shioko	2013///	AC133 Antigen, Animals, Antigens, CD, Antigens, CD34, Antigens, Ly, Bromodeoxyuridine, Cell Lineage, Fluorescent Antibody Technique, Glycoproteins, Integrases, Keratin-14, Membrane Proteins, Mesenchymal Stem Cells, Mice, Models, Biological, Peptides, Regeneration, Thyroid Gland, Thyroidectomy, Tissue Culture Techniques, beta-Galactosidase, cytology, metabolism, physiology, surgery	PloS one	8	eng	11	e80801	e80801	10.1371/journal.pone.0080801	Many tissues are thought to contain adult stem/progenitor cells that are responsible for repair of the tissue where they reside upon damage and/or carcinogenesis, conditions when cellular homeostasis becomes uncontrolled. While the presence of stem/progenitor cells of the thyroid has been suggested, how these cells contribute to thyroid regeneration remains unclear. Here we show the origin of thy…			160
464	JOUR	[An immunofluorescence study of the ontogenesis of mouse thyroid organ-specific antigens: relation to fate of foetal thyroid homografts in adult recipients (author's transl)].	Jeanmarie-Zylberberg, R, Touzet-Bienvenut, N, Chaminade, M	1977///	Aging, Animals, Animals, Newborn, Antigens, Embryo, Mammalian, Epitopes, Female, Fetus, Fluorescent Antibody Technique, Mice, Mice, Inbred C57BL, Organ Specificity, Pregnancy, Thyroid Gland, Transplantation, Homologous, immunology, transplantation	Annales d'immunologie	128C	fre	4-5	851	862		A study of the development of organ specific thyroid antigens in mice showed that these antigens make their appearance on the 17th day of gestation. This causes an increase in the specific antigenicity of the thyroid and coincides with the critical stages at which the fate of a homograft of embryonic thyroid is seen to change: embryonic thyroid tissue from 15-16 day embryo grafted on an adult rec…			161
456	JOUR	The routine demonstration of C cells in human and animal thyroid glands. Value of a simple silver stain.	De Grandi, P	1970///	Animals, Autopsy, Biopsy, Calcitonin, Cell Count, Dogs, Fluorescent Antibody Technique, Guinea Pigs, Histocytochemistry, Histological Techniques, Microscopy, Electron, Microscopy, Fluorescence, Microtomy, Rabbits, Silver Nitrate, Staining and Labeling, Thyroid Gland, cytology, metabolism	Virchows Archiv. B, Cell pathology	6	eng	2	137	150	10.1007/BF02899119				162
758	JOUR	Oridonin induces apoptosis in gastric cancer through Apaf-1, cytochrome c and caspase-3 signaling pathway.	Sun, Ke-Wang, Ma, Ying-Yu, Guan, Tian-Pei, Xia, Ying-Jie, Shao, Chang-Ming, Chen, Le-Gao, Ren, Ya-Jun, Yao, Hai-Bo, Yang, Qiong, He, Xu-Jun	2012/12//	Annexin A5, Antineoplastic Agents, Apoptosis, Apoptotic Protease-Activating Factor 1, Caspase 3, Cell Line, Tumor, Cell Proliferation, Cytochromes c, DNA Fragmentation, Dactinomycin, Diterpenes, Kaurane, Dose-Response Relationship, Drug, Flow Cytometry, Humans, Isodon, Medicine, Chinese Traditional, Microscopy, Fluorescence, Phycoerythrin, Plant Extracts, Signal Transduction, Stomach Neoplasms, T…	World journal of gastroenterology	18	eng	48	7166	7174	10.3748/wjg.v18.i48.7166	AIM: To investigate the effect and mechanism of oridonin on the gastric cancer cell line HGC-27 in vitro. METHODS: The inhibitory effect of oridonin on HGC-27 cells was detected using the 3-(4, 5-dimethylthiazol-2-yl)-2,5-diphenyl tetrazolium bromide assay. After treatment with 10 Î¼g/mL oridonin for 24 h and 48 h, the cells were stained with acridine orange/ethidium bromide. The morphologic chan…			163
743	JOUR	Quantum dot-based immunofluorescent imaging and quantitative detection of TOP2A and prognostic value in triple-negative breast cancer.	Zheng, Hongmei, Li, Xiang, Chen, Chuang, Chen, Jian, Sun, Jinzhong, Sun, Si, Jin, Liting, Li, Juanjuan, Sun, Shengrong, Wu, Xinhong	2016///	Adult, Aged, Antigens, Neoplasm, DNA Topoisomerases, Type II, DNA-Binding Proteins, Disease-Free Survival, Female, Fluorescent Antibody Technique, Humans, Middle Aged, Molecular Imaging, Poly-ADP-Ribose Binding Proteins, Quantum Dots, Triple Negative Breast Neoplasms, chemistry, diagnosis, diagnostic imaging, metabolism, methods	International journal of nanomedicine	11	eng		5519	5529	10.2147/IJN.S111594	BACKGROUND: Topoisomerase 2 alpha (TOP2A) is a key enzyme in DNA replication and a target of various cytotoxic agents including anthracyclines. Previous studies evaluating the predictive and prognostic values of TOP2A in breast cancer are contradictory, likely secondary to the use of both different detection methods and different cutoff thresholds for positive status. Our own studies have previou…			164
447	JOUR	Vascular permeability and axonal regeneration in tissues autotransplanted into the brain.	Heinicke, E A	1980///	Animals, Axons, Brain, Capillary Permeability, Male, Mice, Muscles, Nerve Regeneration, Peripheral Nerves, Skin Transplantation, Submandibular Gland, Tendons, Thyroid Gland, Transplantation, Autologous, surgery, transplantation, ultrastructure	Acta neuropathologica	49	eng	3	177	185	10.1007/BF00707104	Pieces of skin, peripheral nerve, muscle, tendon, thyroid gland, and submandibular gland were autotransplanted into the brains of mice. The animals were killed after 5-week periods. Fluorescently labelled albumin was injected i.v. 1 h prior to death. Silver-impregnated sections were examined under the light microscope for the regeneration of axons from the brains into the implanted tissues. Unsta…			165
666	JOUR	Thimerosal increases the responsiveness of the calcium receptor in human parathyroid and rMTC6-23 cells.	Mihai, R, Lai, T, Schofield, G, Farndon, J R	1999///	Adenoma, Animals, Calcium-Binding Proteins, Extracellular Space, Gadolinium, Humans, Microscopy, Fluorescence, Parathyroid Glands, Parathyroid Neoplasms, Rats, Thimerosal, Tumor Cells, Cultured, agonists, drug effects, metabolism, pharmacology	Cell calcium	26	eng	3-4	95	101	10.1054/ceca.1999.0055	Parathyroid cells express a plasma membrane calcium receptor (CaR), which is stimulated by a rise in extracellular calcium concentration ([Ca2+]ext). A decreased sensitivity to [Ca2+]ext occurs in adenomatous parathyroid cells in patients with primary hyperparathyroidism, but the underlying functional mechanism is not yet fully understood. This study explored whether CaR responsiveness is influen…			166
11	JOUR	Simple D-A-D Structural Bisbithiophenyl Diketopyrrolopyrrole as Efficient Bioimaging and Photothermal Agents.	Zong, Shan, Wang, Xin, Lin, Wenhai, Liu, Shi, Zhang, Wei	2018/08//	Boric Acids, Cell Survival, HeLa Cells, Humans, Molecular Structure, Nanoparticles, Optical Imaging, Phototherapy, Poloxamer, Pyrroles, Theranostic Nanomedicine, chemistry, methods	Bioconjugate chemistry	29	eng	8	2619	2627	10.1021/acs.bioconjchem.8b00333	Design and synthesis of biocompatible and multifunctional photothermal agents is crucial for effective cancer phototherapy. In order to achieve this ambition, simple D-A-D structural bisbithiophenyl diketopyrrolopyrrole (TDPP) was fabricated. In this molecule, the donor, 2-thiophenylboric acid, was conjugated via Suzuki coupling reaction, which could expand the emission wavelength to the red regi…			167
202	JOUR	Optimizing detection of RET and PPARg rearrangements in thyroid neoplastic cells using a home-brew tetracolor probe.	Caria, Paola, Frau, Daniela V, Dettori, Tinuccia, Boi, Francesco, Lai, Maria L, Mariotti, Stefano, Vanni, Roberta	2014/05//	Adenocarcinoma, Follicular, Biopsy, Fine-Needle, Carcinoma, Papillary, Feasibility Studies, Fluorescent Dyes, Follow-Up Studies, Gene Rearrangement, Goiter, Nodular, Humans, In Situ Hybridization, Fluorescence, PPAR gamma, Prognosis, Proto-Oncogene Proteins c-ret, RNA, Messenger, Reverse Transcriptase Polymerase Chain Reaction, Sensitivity and Specificity, Thyroid Neoplasms, genetics, pathology	Cancer cytopathology	122	eng	5	377	385	10.1002/cncy.21397	BACKGROUND: Fluorescence in situ hybridization (FISH) to identify specific DNA target sequences in the nuclei of nondividing cells of numerous solid neoplasms has contributed to the introduction of molecular cytogenetics as a useful adjunct to cytology, leading recently to the "marriage" of the 2 disciplines. Numerous cancer molecular markers can now be investigated using different technical appr…			168
384	JOUR	Lack of gonadotrophin-releasing hormone (GnRH) neuron response to decreasing photoperiod in thyroidectomized male starlings (Sturnus vulgaris).	Bentley, G E, Dawson, A, Goldsmith, A R	2000/06//	Animals, Birds, Cell Count, Fluorescent Antibody Technique, Indirect, Gonadotropin-Releasing Hormone, Image Processing, Computer-Assisted, Male, Median Eminence, Neurons, Organ Size, Photoperiod, Testis, Thyroid Gland, Thyroidectomy, anatomy & histology, cytology, metabolism, physiology	The Journal of experimental zoology	287	eng	1	74	79	10.1002/1097-010x(20000615)287:1<74::aid-jez9>3.0.co;2-r	Exposure of starlings to long days initially causes reproductive maturation, but eventually leads to photorefractoriness. During photorefractoriness, gonadotrophin-releasing hormone (GnRH) decreases in the GnRH cell bodies and fibers emanating from these to the median eminence, circulating gonadotrophin concentrations decrease to a minimum, and the gonads regress. Thyroidectomy profoundly affects…			169
191	JOUR	Biological Evaluation of a Fluorescent-Imaging Agent for Medullary Thyroid Cancer in an Orthotopic Model.	Rossfeld, Kara K, Justiniano, Steven E, Ding, Haiming, Gong, Li, Kothandaraman, Shankaran, Sawant, Dwitiya, Saji, Motoyasu, Wright, Chadwick L, Kirschner, Lawrence S, Ringel, Matthew D, Tweedle, Michael F, Phay, John E	2017/09//	Animals, Biopsy, Needle, Calcitonin, Carcinoma, Neuroendocrine, Disease Models, Animal, Fluorescent Antibody Technique, Heterografts, Humans, Immunohistochemistry, Iohexol, Mice, Monitoring, Intraoperative, Positron-Emission Tomography, Sensitivity and Specificity, Thyroid Neoplasms, Thyroidectomy, analogs & derivatives, blood, diagnostic imaging, methods, pathology, pharmacology, surgery	The Journal of clinical endocrinology and metabolism	102	eng	9	3268	3277	10.1210/jc.2017-00573	CONTEXT: The primary and definitive treatment of medullary thyroid cancer (MTC) is surgical resection. Recurrent or residual disease is typically a result of incomplete surgical removal. OBJECTIVE: Our objective is to develop a compound that assists in intraoperative visualization of cancer, which would have the potential to improve surgical cure rates and outcomes. RESULTS: We report the biologi…			170
507	JOUR	Carcinoma of the thyroid with a mixed medullary and follicular pattern: morphologic, immunohistochemical, and clinical laboratory studies.	Hales, M, Rosenau, W, Okerlund, M D, Galante, M	1982/10//	Adult, Calcitonin, Carcinoma, Fluorescent Antibody Technique, Histocytochemistry, Humans, Iodine Radioisotopes, Lymph Nodes, Lymphatic Metastasis, Male, Microscopy, Electron, Radioimmunoassay, Thyroglobulin, Thyroid Neoplasms, analysis, metabolism, pathology, ultrastructure	Cancer	50	eng	7	1352	1359	10.1002/1097-0142(19821001)50:7<1352::aid-cncr2820500722>3.0.co;2-q	We recently encountered an unusual carcinoma of the thyroid gland with a predominantly medullary pattern admixed with areas of follicular differentiation. Both patterns prevailed at the primary site and in bilateral cervical lymph node metastases. The tumor cells were stained for calcitonin by indirect immunofluorescence technique and were found to contain dense-core granules by electron microsco…			171
612	JOUR	Dermatitis herpetiformis.	Fry, L	1995/06//	Adolescent, Adult, Aged, Aged, 80 and over, Biopsy, Celiac Disease, Combined Modality Therapy, Dermatitis Herpetiformis, Diseases in Twins, Female, Fluorescent Antibody Technique, Glutens, Histocompatibility Antigens Class II, Humans, Immunoglobulin A, Intestinal Mucosa, Male, Middle Aged, Skin, administration & dosage, adverse effects, analysis, diagnosis, diet therapy, genetics, pathology	Bailliere's clinical gastroenterology	9	eng	2	371	393	10.1016/0950-3528(95)90036-5	Dermatitis herpetiformis (DH) is a relatively rare skin disorder with an estimated incidence of 1:10,000 in the UK. It is characterized by urticarial plaques and blisters on the elbows, buttocks, and knees, although other sites may also be involved. The eruption tends to be persistent: only 10-15% of patients have spontaneous remission over a 25-year study period. The disease is characterized by …			172
425	JOUR	INT-2 gene amplification in differentiated human thyroid cancer.	Schulte, K M, Niederacher, D, An, H X, Staudt, S, Simon, D, Beckmann, M W, Goretzki, P E	1996///	Adenoma, Adult, Carcinoma, Papillary, Cell Differentiation, Fibroblast Growth Factor 3, Fibroblast Growth Factors, Gene Amplification, Humans, Interferon-gamma, Middle Aged, Polymerase Chain Reaction, Prognosis, Proto-Oncogene Proteins, Thyroid Neoplasms, genetics	Experimental and clinical endocrinology & diabetes : official journal, German Society of Endocrinology [and] German Diabetes Association	104 Suppl 4	eng		101	104	10.1055/s-0029-1211713	Oncogene amplification is frequent in many epithelial tumors and often associated with advanced tumor progression. In different epithelial neoplasias it helps to provide prognostic information on individual patients. The present study was performed to evaluate the hitherto unknown prevalence of INT-2 gene amplification and its potential usefulness as prognostic marker in patients with human thyro…			173
364	JOUR	In vivo formation of gamma-H2AX and 53BP1 DNA repair foci in blood cells after radioiodine therapy of differentiated thyroid cancer.	Lassmann, Michael, HÃ¤nscheid, Heribert, Gassen, Daniela, Biko, Johannes, Meineke, Viktor, Reiners, Christoph, Scherthan, Harry	2010/08//	Adult, Aged, Algorithms, Blood Cells, DNA Breaks, Double-Stranded, DNA Damage, DNA Repair, Dose-Response Relationship, Radiation, Female, Fluorescent Antibody Technique, Histones, Humans, Intracellular Signaling Peptides and Proteins, Iodine Radioisotopes, Male, Middle Aged, Thyroid Neoplasms, Thyroidectomy, Tumor Suppressor p53-Binding Protein 1, Whole-Body Irradiation, adverse effects, blood, g…	Journal of nuclear medicine : official publication, Society of Nuclear Medicine	51	eng	8	1318	1325	10.2967/jnumed.109.071357	DNA double-strand breaks (DSBs) are critical cellular lesions that can result from ionizing radiation exposure. A marker for DSB formation is the phosphorylated form of the histone H2 variant H2AX (gamma-H2AX). DSBs also attract the damage sensor p53-binding protein 1 (53BP1) to the DSB-containing chromatin, because 53BP1 associates with the DSB-surrounding chromatin. We studied the induction, pe…			174
321	JOUR	Mammary Analog Secretory Carcinoma (MASC) Involving the Thyroid Gland: A Report of the First 3 Cases.	Dettloff, Jennifer, Seethala, Raja R, Stevens, Todd M, Brandwein-Gensler, Margaret, Centeno, Barbara A, Otto, Kristen, Bridge, Julia A, Bishop, Justin A, Leon, Marino E	2017/06//	Aged, Female, Humans, Male, Mammary Analogue Secretory Carcinoma, Middle Aged, Oncogene Proteins, Fusion, Thyroid Neoplasms, diagnosis, genetics, pathology	Head and neck pathology	11	eng	2	124	130	10.1007/s12105-016-0741-6	Salivary gland-type tumors have been rarely described in the thyroid gland. Mammary Analog Secretory Carcinoma (MASC) is a recently defined type of salivary gland carcinoma characterized by a t(12;15)(p13;q25) resulting in an ETV6-NTRK3 fusion gene. We report 3 cases of MASC involving the thyroid gland without clinical evidence of a salivary gland or breast primary; the clinico-pathologic charact…			175
513	JOUR	Impact of different methodologies on the detection of point mutations in routine air-dried fine needle aspiration (FNA) smears.	Rehfeld, C, MÃ¼nz, S, Krogdahl, A, Jensen, E M P, Siebolts, U, Ferraz, C, BÃ¶senberg, E, HegedÃ¼s, L, Paschke, R, Eszlinger, M	2013/07//	Biopsy, Fine-Needle, GTP Phosphohydrolases, Humans, Membrane Proteins, Point Mutation, Polymerase Chain Reaction, Proto-Oncogene Proteins, Proto-Oncogene Proteins B-raf, Proto-Oncogene Proteins p21(ras), Sequence Analysis, DNA, Thyroid Neoplasms, Thyroid Nodule, diagnosis, genetics, methods, pathology, ras Proteins	Hormone and metabolic research = Hormon- und Stoffwechselforschung = Hormones et metabolisme	45	eng	7	513	517	10.1055/s-0033-1337987	Currently the best method to select suspicious thyroid nodules for surgery is fine needle aspiration (FNA) cytology. However, FNA cytology has some inherent limitations, which can partly be overcome by molecular analysis. Therefore, molecular testing for somatic mutations has emerged as the most promising approach for molecular FNA diagnostics. The objective of this methodological study was to ev…			176
318	JOUR	A pilot study demonstrating the feasibility of supermicrosurgical end-to-side anastomosis onto large recipient vessels in head and neck reconstruction.	Iida, Takuya, Yoshimatsu, Hidehiko, Yamamoto, Takumi, Koshima, Isao	2016/12//	Anastomosis, Surgical, Arteries, Feasibility Studies, Female, Head and Neck Neoplasms, Humans, Japan, Male, Microsurgery, Middle Aged, Perforator Flap, Pilot Projects, Reconstructive Surgical Procedures, Reproducibility of Results, Suture Techniques, Tissue Survival, Treatment Outcome, adverse effects, blood supply, methods, pathology, surgery	Journal of plastic, reconstructive & aesthetic surgery : JPRAS	69	eng	12	1662	1668	10.1016/j.bjps.2016.09.018	In head and neck reconstruction using free flaps, microvascular anastomosis is commonly performed in an end-to-end fashion to relatively sizable arteries including the superficial temporal, facial, and superior thyroid arteries. With the recent developments of less invasive perforator flaps such as the superficial circumflex iliac artery perforator flap, anastomosis of smaller vessels of less tha…			177
619	JOUR	Comparison of HER2 Status Before and After Trastuzumab-based Chemotherapy in Patients With Advanced Gastric Cancer.	Kijima, Takashi, Arigami, Takaaki, Uenosono, Yoshikazu, Hiraki, Tsubasa, Yanagita, Shigehiro, Matsushita, Daisuke, Okubo, Keishi, Shimonosono, Masataka, Ishigami, Sumiya, Maemura, Kosei, Tanimoto, Akihide, Natsugoe, Shoji	2020/01//	Adult, Aged, Antineoplastic Combined Chemotherapy Protocols, Biomarkers, Tumor, Combined Modality Therapy, Female, Humans, Immunohistochemistry, In Situ Hybridization, Fluorescence, Male, Middle Aged, Molecular Targeted Therapy, Multimodal Imaging, Neoplasm Metastasis, Neoplasm Staging, Receptor, ErbB-2, Recurrence, Stomach Neoplasms, Trastuzumab, Treatment Outcome, administration & dosage, adver…	Anticancer research	40	eng	1	75	80	10.21873/anticanres.13927	BACKGROUND/AIM: The aim of the present study was to compare human epidermal growth factor receptor 2 (HER2) expression before and after trastuzumab-based chemotherapy in patients with advanced HER2-positive gastric cancer. MATERIALS AND METHODS: We assessed HER2 expression using immunohistochemistry and/or fluorescence in situ hybridization in pre-treatment biopsied specimens and post-treatment r…			178
179	JOUR	Expression of ARE-binding proteins AUF1 and HuR in follicular adenoma and carcinoma of thyroid gland.	Trojanowicz, B, Sekulla, C, Dralle, H, Hoang-Vu, C	2016///	Adenocarcinoma, Follicular, Adenoma, Biopsy, Fine-Needle, Blotting, Western, ELAV-Like Protein 1, Fluorescent Antibody Technique, Goiter, Heterogeneous Nuclear Ribonucleoprotein D0, Heterogeneous-Nuclear Ribonucleoprotein D, Humans, Neoplasm Staging, Thyroid Neoplasms, biosynthesis, metabolism, pathology	Neoplasma	63	eng	3	371	377	10.4149/305_150819N450	Both adenylate-uridylate rich elements binding proteins AUF1 and HuR may participate in thyroid carcinoma progression. In this study we investigated the expression of both factors on aÂ protein level with aÂ special focus on follicular adenoma and follicular thyroid carcinoma. By employment of immunofluorescence and western blot on 68 thyroid tissues including 7 goiter, 16 follicular adenoma (4 a…			179
147	JOUR	Array-based in situ fluorescence assay for profiling multiplex matrix metalloproteinases activities in tissue section.	Lei, Zhen, Jian, Minghong, Wei, Jia, Wang, Yaoqi, Meng, Xianying, Wang, Zhenxin	2019/10//	Cell Line, Tumor, Enzyme Assays, Fluoresceins, Fluorescence, Fluorescent Dyes, Humans, Hydrolysis, Matrix Metalloproteinase Inhibitors, Matrix Metalloproteinases, Microscopy, Fluorescence, Peptides, Proof of Concept Study, Thyroid Gland, analysis, chemistry, metabolism, methods, pharmacology	Analytica chimica acta	1078	eng		112	118	10.1016/j.aca.2019.05.071	Herein, an array-based in situ fluorescence assay is proposed for high-throughput analysis and localization of multiplex matrix metalloproteinases (MMPs) activities in cell monolayers and tissue sections. Five specific MMPs (MMP-2, -3, -7, -9, and -14) peptide substrates containing FAM/Dabcyl fluorescent resonance energy transfer (FRET) pair are directly spotted on the surface of cell monolayers …			180
335	JOUR	Effect of a local delivery of triiodothyronine (T3) within neuroregenerative guide on recovery of erectile function in a rat-model of cavernous nerve injury.	Bessede, Thomas, Alsaid, Bayan, Ferretti, Ludovic, Pierre, Michel, BernabÃ©, Jacques, Giuliano, FranÃ§ois, Karam, Ibrahim, BenoÃ®t, GÃ©rard, Droupy, StÃ©phane	2010/05//	Administration, Topical, Animals, Autonomic Pathways, Disease Models, Animal, Male, Nerve Crush, Nerve Regeneration, Penile Erection, Penis, Rats, Rats, Sprague-Dawley, Triiodothyronine, drug effects, injuries, innervation, pathology, pharmacology	The journal of sexual medicine	7	eng	5	1798	1806	10.1111/j.1743-6109.2010.01706.x	INTRODUCTION: A promoting effect of thyroid hormones has been established on the maturation of central and peripheral nervous systems. However, effects on autonomic nerves have never been experimentally investigated. AIM: To assess the effect of a local treatment combining silicone guides and local administration of Triiodothyronine (T3) on the erectile function and the histological neuroregenera…			181
712	JOUR	Glypican-1-antibody-conjugated Gd-Au nanoclusters for FI/MRI dual-modal targeted detection of pancreatic cancer.	Huang, Xin, Fan, Chengqi, Zhu, Huanhuan, Le, Wenjun, Cui, Shaobin, Chen, Xin, Li, Wei, Zhang, Fulei, Huang, Yong, Sh, Donglu, Cui, Zheng, Shao, Chengwei, Chen, Bingdi	2018///	Animals, Antibodies, Cell Line, Tumor, Contrast Media, Flow Cytometry, Gadolinium, Gadolinium DTPA, Glypicans, Gold, Humans, Magnetic Resonance Imaging, Male, Mice, Nude, Molecular Probe Techniques, Nanostructures, Optical Imaging, Pancreatic Neoplasms, Xenograft Model Antitumor Assays, chemistry, diagnostic imaging, immunology, methods	International journal of nanomedicine	13	eng		2585	2599	10.2147/IJN.S158559	INTRODUCTION: Pancreatic cancer (PC) has a poor prognosis with high mortality, due to the lack of effective early diagnostic and prognostic tools. MATERIALS AND METHODS: In order to target and diagnose PC, we developed a dual-modal imaging probe using Glypican-1 (GPC-1) antibody conjugated with Gd-Au nanoclusters (NCs; Gd-Au-NC-GPC-1). GPC-1 is a type of cell surface heparan sulfate proteoglycan,…			182
627	JOUR	Relationship between driver gene mutations, their relative protein expressions and survival in non-small cell lung carcinoma in Macao.	Chan, Kin Iong, Vong, Hong Ting, Sin, Lai Fong, Yip, Yuk Ching, Zhong, Xue Yun, Wen, Jian Ming	2018/04//	Adult, Aged, Aged, 80 and over, Biopsy, Carcinoma, Non-Small-Cell Lung, DNA Mutational Analysis, DNA, Neoplasm, ErbB Receptors, Female, Humans, Immunohistochemistry, In Situ Hybridization, Fluorescence, Incidence, Lung Neoplasms, Macau, Male, Middle Aged, Mutation, Neoplasm Staging, Polymerase Chain Reaction, Proto-Oncogene Proteins B-raf, Proto-Oncogene Proteins p21(ras), Survival Rate, epidemio…	The clinical respiratory journal	12	eng	4	1416	1423	10.1111/crj.12670	OBJECTIVES: We report the status of most common gene mutations in non-small cell lung carcinoma (NSCLC) in Macao, and explore the relationship between each gene mutation and clinicopathologic features and survival. METHODS: EGFR, KRAS and BRAF mutations were detected by PCR in 122 cases of NSCLC. ALK translocation and MET amplification were detected by fluorescence in situ hybridization (FISH). M…			183
323	JOUR	[TMPRSS2-ERG gene fusion in metastatic prostate cancers: a study of fine needle aspiration specimens].	Xiao, Li, Zhu, Xiong-zeng, Wang, Yan, Gong, Yun, Guo, C Charles	2011/06//	Acid Phosphatase, Adenocarcinoma, Aged, Aged, 80 and over, Biopsy, Fine-Needle, Carcinoma, Small Cell, Chromogranin A, Follow-Up Studies, Gene Fusion, Gene Rearrangement, Humans, In Situ Hybridization, Fluorescence, Liver Neoplasms, Lymphatic Metastasis, Male, Middle Aged, Oncogene Proteins, Fusion, Prostate-Specific Antigen, Prostatic Neoplasms, Protein Tyrosine Phosphatases, Synaptophysin, gene…	Zhonghua bing li xue za zhi = Chinese journal of pathology	40	chi	6	392	396		OBJECTIVE: To investigate diagnostic values of the detection of TMPRSS2-ERG gene fusion in metastatic prostate cancer. METHODS: A total of 32 fine needle aspiration (FNA) specimens of metastatic prostate carcinomas were retrieved from the pathology files at MD Anderson Cancer Center. The metastatic sites included the pelvic and remote lymph nodes, liver, bone, and thyroid gland. Immunohistochemic…			184
94	JOUR	Radioguided Occult Lesion Localization: Technical Procedures and Clinical Applications.	Manca, Gianpiero, Mazzarri, Sara, Rubello, Domenico, Tardelli, Elisa, Delgado-Bolton, Roberto C, Giammarile, Francesco, Roncella, Manuela, Volterrani, Duccio, Colletti, Patrick M	2017/12//	Humans, Neoplasms, Unknown Primary, Radioactive Tracers, Surgery, Computer-Assisted, diagnostic imaging, methods, surgery	Clinical nuclear medicine	42	eng	12	e498	e503	10.1097/RLU.0000000000001858	PURPOSE: Regarding radioguided surgery, the concept of "radioguided occult lesion localization" (ROLL) is based on both preoperative interventional imaging and intraoperative radioguided detection of a clinically occult neoplastic lesion. METHODS: This methodology consists in the direct administration into the lesion of Tc-macroaggregated human albumin formed by relatively large particles retaine…			185
568	JOUR	Delayed development of GFA immunoreactivity in intraocular cortex cerebri grafts during thyroid hormone deficiency.	Granholm, A C, Dahl, D, BjÃ¶rklund, H, Seiger, A	1985///		International journal of developmental neuroscience : the official journal of the International Society for Developmental Neuroscience	3	eng	1	33	40	10.1016/0736-5748(85)90017-6	Dependency of astrocytes on thyroid hormones during development was studied in intraocular cortex cerebri grafts, using antibodies to the glial fibrillary acidic protein (GFA). Fetal cortex cerebri was left in the anterior eye chamber of normal and thyroidectomized adult recipient rats 3 and 8 weeks to mature. All cortex grafts survived and became vascularized in the eye. The grafts were cryostat…			186
325	JOUR	Extra-osseous Ewing sarcoma of the thyroid gland mimicking lymphoma recurrence: a case report.	Maldi, Elena, Monga, Guido, Rossi, Davide, Tosoni, Antonella, Mezzapelle, Rosanna, Boldorini, Renzo	2012/06//	Aged, Biomarkers, Tumor, Biopsy, Needle, Calmodulin-Binding Proteins, DNA, Neoplasm, Diagnosis, Differential, Glycogen, Humans, In Situ Hybridization, Fluorescence, Incidental Findings, Lymph Nodes, Lymphoma, Large B-Cell, Diffuse, Male, Neoplasm Recurrence, Local, Neuroectodermal Tumors, Primitive, Peripheral, RNA-Binding Protein EWS, RNA-Binding Proteins, Sarcoma, Ewing, Secretory Vesicles, Thy…	Pathology, research and practice	208	eng	6	356	359	10.1016/j.prp.2012.03.005	Extra-osseous Ewing sarcomas/peripheral primitive neuroectodermal tumors (EOES/pPNETs) are high-grade malignant tumors found in various organs, such as the lung, skin, intestine, kidney and female genital tract; however, to the best of our knowledge, only two cases have previously been identified in the thyroid gland. We describe a case of primary EOES/PNET of the thyroid gland in a 66-year-old m…			187
674	JOUR	X monosomy in female systemic lupus erythematosus.	Invernizzi, Pietro, Miozzo, Monica, Oertelt-Prigione, Sabine, Meroni, Pier Luigi, Persani, Luca, Selmi, Carlo, Battezzati, Pier Maria, Zuin, Massimo, Lucchi, Simona, Marasini, Bianca, Zeni, Silvana, Watnik, Mitchell, Tabano, Silvia, Maitz, Silvia, Pasini, Simone, Gershwin, M Eric, Podda, Mauro	2007/09//	Adult, Age Distribution, Aged, Aged, 80 and over, Chimerism, Chromosomes, Human, X, Female, Humans, Leukocyte Count, Leukocytes, Lupus Erythematosus, Systemic, Middle Aged, Monosomy, diagnosis, genetics, metabolism	Annals of the New York Academy of Sciences	1110	eng		84	91	10.1196/annals.1423.010	Systemic lupus erythematosus (SLE) is a systemic autoimmune disease, predominantly occurring in women of childbearing age. SLE, like several other autoimmune diseases, is characterized by a striking female predominance and, although sex hormone influences have been suggested as an explanation for this phenomenon, definitive data are still unavailable. Our group recently reported an increased X mo…			188
290	JOUR	New attempt of preoperative differential diagnosis of thyroid neoplasms by telomerase activity measurement.	Suzuki, Shinichi, Fukushima, Toshihiko, Ami, Hirofumi, Onogi, Hitoshi, Nakamura, Izumi, Takenoshita, Seiichi	2002///	Adenocarcinoma, Follicular, Adenoma, Carcinoma, Carcinoma, Medullary, Carcinoma, Papillary, Diagnosis, Differential, Goiter, Humans, Telomerase, Telomere, Thyroid Neoplasms, diagnosis, enzymology, metabolism, surgery	Oncology reports	9	eng	3	539	544		Telomerase activity (TA) has been shown highly expressed in various solid malignant neoplasms, but only rarely in benign tumor or normal tissues. Most reports examined TA by the qualitative method, telomeric repeat amplification protocol (TRAP) assay. We examined TA in tissues of thyroid neoplasm by quantitative method to establish whether TA was a useful marker for preoperative differential diag…			189
309	JOUR	Distribution of microsomal antigen in various types of thyroid tumour.	Doniach, I, Perrin, J	1973/05//	Adenocarcinoma, Adenoma, Adult, Antibodies, Anti-Idiotypic, Antigens, Carcinoma, Carcinoma, Papillary, Female, Fluorescent Antibody Technique, Humans, Male, Microscopy, Electron, Microsomes, Middle Aged, Mitochondria, Thyroid Neoplasms, analysis, immunology	Clinical and experimental immunology	14	eng	1	77	90		Fresh surgical material from forty-eight patients undergoing partial thyroidectomy for thyroid tumour was examined by immunofluorescence staining with antisera for the presence of thyroid-microsomal, mitochondrial and thyroglobulin antigens. Light microscopy on cryostat and paraffin-wax embedded sections was carried out in all cases. Electron microscopy was done on samples from thirteen tumours. …			190
663	JOUR	Role of Heterotypic Neutrophil-in-Tumor Structure in the Prognosis of Patients With Buccal Mucosa Squamous Cell Carcinoma.	Fan, Jie, Fang, Qigen, Yang, Yang, Cui, Meng, Zhao, Ming, Qi, Jinxing, Luo, Ruihua, Du, Wei, Liu, Shanting, Sun, Qiang	2020///		Frontiers in oncology	10	eng		541878	541878	10.3389/fonc.2020.541878	OBJECTIVE: To analyze the role of frequency of heterotypic neutrophil-in-tumor structure (FNiT) in the prognosis of patients with buccal mucosa squamous cell carcinoma (BMSCC). METHODS: In vitro, we cocultured BMSCC cell line-H157 with neutrophils to form heterotypic neutrophil-in-tumor structures, which were then subject to fluorescence staining. Clinically, 145 patients were retrospectively enr…			191
326	JOUR	CD147 expression as a significant prognostic factor in differentiated thyroid carcinoma.	Tan, Hui, Ye, Ke, Wang, Zhiming, Tang, Huihuan	2008/09//	Adenocarcinoma, Follicular, Adenocarcinoma, Papillary, Adolescent, Adult, Aged, Aged, 80 and over, Basigin, Biomarkers, Tumor, Female, Fluorescent Antibody Technique, Indirect, Humans, Immunoenzyme Techniques, Lymph Nodes, Male, Middle Aged, Prognosis, Survival Rate, Thyroid Gland, Thyroid Neoplasms, Young Adult, metabolism, mortality, pathology, surgery	Translational research : the journal of laboratory and clinical medicine	152	eng	3	143	149	10.1016/j.trsl.2008.07.005	CD147 is 1 of the molecules involved in regulating the expression of matrix metalloproteinases (MMPs). The goal of this study was to analyze the expression of CD147 in differentiated thyroid carcinoma (DTC) tissues as well as its association with the clinicopathologic features of DTC patients and its prognostic significance. During our research, CD147 expression in 156 patients who underwent oper…			192
151	JOUR	Detection of RET rearrangements in papillary thyroid carcinoma using RT-PCR and FISH techniques - A molecular and clinical analysis.	Musholt, Thomas Johannes, Staubitz, Julia Isabelle, Antonio CÃ¡mara, Rafael Jaime, Musholt, Petra Brigitta, Humberg, Diana, Springer, Erik, Schad, Arno	2019/06//	Adult, Aged, Female, Gene Rearrangement, Humans, In Situ Hybridization, Fluorescence, Iodine Radioisotopes, Lymph Nodes, Male, Middle Aged, Oncogene Fusion, Proto-Oncogene Proteins B-raf, Proto-Oncogene Proteins c-ret, Reverse Transcriptase Polymerase Chain Reaction, Thyroid Cancer, Papillary, Thyroid Neoplasms, Tumor Burden, genetics, metabolism, pathology	European journal of surgical oncology : the journal of the European Society of Surgical Oncology and the British Association of Surgical Oncology	45	eng	6	1018	1024	10.1016/j.ejso.2018.11.009	INTRODUCTION: Oncogenic BRAF and RAS mutations as well as multiple known (and yet unknown) RET fusion oncogenes comprise the majority of causative molecular alterations in papillary thyroid carcinoma (PTC). Apparently "mutation-negative" PTCs encompass a heterogenous group impeding analysis of prognostic significance of underlying genetics. MATERIAL AND METHODS: BRAF wild type PTC tissue of 56 pa…			193
398	JOUR	Minimize the extent and morbidity of axillary dissection for node-positive breast cancer patients: implementation of axillary lymph node dissection based on breast lymphatics level.	Yuan, Qianqian, Hou, Jinxuan, He, Yukun, Liao, Yiqian, Zheng, Lewei, Wu, Gaosong	2021/03//	Axilla, Breast, Breast Neoplasms, Dissection, Female, Humans, Indocyanine Green, Intraoperative Care, Lymph Node Excision, Lymphatic Metastasis, Lymphedema, Mastectomy, Middle Aged, Pilot Projects, Practice Guidelines as Topic, Prospective Studies, Sentinel Lymph Node, Sentinel Lymph Node Biopsy, administration & dosage, adverse effects, complications, diagnosis, diagnostic imaging, etiology, met…	BMC cancer	21	eng	1	293	293	10.1186/s12885-021-08024-y	BACKGROUND: Breast cancer-related lymphedema (BCRL) is associated with extensive axillary dissection. Axillary lymph node dissection (ALND) based on breast lymphatics level (BLL) was proposed to minimize the surgical extent for node-positive breast cancer patients. METHODS: A total of 156 consecutive sentinel lymph node-positive (SLN+) or clinically node-positive (cN+) patients underwent sentinel…			194
727	JOUR	Nuclear C-MYC expression level is associated with disease progression and potentially predictive of two year overall survival in prostate cancer.	Zeng, Wen, Sun, Hanying, Meng, Fankai, Liu, Zeming, Xiong, Jing, Zhou, Sheng, Li, Fan, Hu, Jia, Hu, Zhiquan, Liu, Zheng	2015///	Aged, Aged, 80 and over, Biomarkers, Tumor, Cell Nucleus, Disease Progression, Humans, Immunohistochemistry, In Situ Hybridization, Fluorescence, Kaplan-Meier Estimate, Lymphatic Metastasis, Male, Middle Aged, Neoplasm Grading, Neoplasm Staging, Oncogene Proteins, Fusion, Predictive Value of Tests, Proportional Hazards Models, Prostatic Neoplasms, Proto-Oncogene Proteins c-myc, Retrospective Stud…	International journal of clinical and experimental pathology	8	eng	2	1878	1888		PURPOSE: Upregulation of nuclear C-MYC protein has been reported to be an early event in prostate cancer (PCa); however, its clinicopathological and prognostic significance remain controversial. We determined the association of nuclear C-MYC protein expression with clinicopathological parameters, prognosis, ETS-related gene (ERG) expression, and TMPRSS2-ERG status in PCa. METHODS: Nuclear C-MYC a…			195
534	JOUR	Identification of IGF-I in the calvarial suture of young rats: histochemical analysis of the cranial sagittal sutures in a hyperthyroid rat model.	Akita, S, Hirano, A, Fujii, T	1996/01//	Alkaline Phosphatase, Analysis of Variance, Animals, Biomarkers, Calcium, Cephalometry, Cranial Sutures, Craniosynostoses, Disease Models, Animal, Female, Hyperthyroidism, Immunohistochemistry, Insulin-Like Growth Factor I, Microscopy, Fluorescence, Phosphorus, Rats, Rats, Wistar, Triiodothyronine, analysis, blood, chemically induced, chemistry, complications, etiology, metabolism, pathology, phy…	Plastic and reconstructive surgery	97	eng	1	1	12	10.1097/00006534-199601000-00001	Premature closure of cranial sutures has been known as one of the complications of juvenile or congenital hyperthyroidism. Thyroid hormone is an anabolic agent for bone formation in the early stages of childhood development. In children, excess thyroid hormone acts as an acceleration factor for the skeletal bone, whereas in adult hyperthyroidism, it causes bone mineral loss due to the high turnov…			196
350	JOUR	Clinical applications of sentinel lymph-node biopsy for the staging and treatment of solid neoplasms.	Gipponi, M	2005/08//	Breast Neoplasms, Female, Gastrointestinal Neoplasms, Genital Neoplasms, Female, Humans, Melanoma, Neoplasm Staging, Neoplasms, Sentinel Lymph Node Biopsy, methods, pathology, therapy	Minerva chirurgica	60	eng	4	217	233		A review of the clinical applications of sentinel lymph node (sN) biopsy has been performed with the aim of defining the rationale, the methods of detection, the accuracy, and the current indications to sN biopsy in different solid neoplasms. In melanoma patients, sN biopsy represents a standard procedure for staging purpose, although its therapeutic value is still under examination. The sN is an…			197
382	JOUR	Thyrotropin receptor antisera for the detection of immunoreactive protein species in retroocular fibroblasts obtained from patients with Graves' ophthalmopathy.	Burch, H B, Sellitti, D, Barnes, S G, Nagy, E V, Bahn, R S, Burman, K D	1994/06//	Amino Acid Sequence, Animals, Cells, Cultured, Enzyme-Linked Immunosorbent Assay, Eye, Fibroblasts, Fluorescent Antibody Technique, Graves Disease, Humans, Immune Sera, Immunoblotting, Immunoenzyme Techniques, Molecular Sequence Data, Ophthalmologic Surgical Procedures, Peptides, Rabbits, Receptors, Thyrotropin, Swine, Thyroid Gland, analysis, chemical synthesis, cytology, immunology, metabolism,…	The Journal of clinical endocrinology and metabolism	78	eng	6	1384	1391	10.1210/jcem.78.6.8200941	Autoimmunity against the TSH receptor (hTSH-R) is known to be the proximate cause of thyroidal activation in Graves' disease, but has not been definitively linked to extrathyroidal manifestations of this disorder, such as ophthalmopathy and pretibial myxedema. In an effort to increase our knowledge concerning mechanisms responsible for Graves' ophthalmopathy, we used antiserum directed against a …			198
334	JOUR	Spindle epithelial tumor with thymus-like differentiation: a morphologic, immunohistochemical, and molecular genetic study of 11 cases.	Folpe, Andrew L, Lloyd, Ricardo V, Bacchi, Carlos E, Rosai, Juan	2009/08//	Adolescent, Adult, Biomarkers, Tumor, Child, Diagnosis, Differential, Female, Head and Neck Neoplasms, Humans, Immunohistochemistry, Male, Middle Aged, Neoplasms, Glandular and Epithelial, Reverse Transcriptase Polymerase Chain Reaction, Sarcoma, Synovial, Thyroid Neoplasms, Young Adult, analysis, genetics, metabolism, pathology	The American journal of surgical pathology	33	eng	8	1179	1186	10.1097/PAS.0b013e31819e61c8	Spindle epithelial tumor with thymus-like differentiation (SETTLE) is an extremely rare tumor of the thyroid and neck, first described by Chan and Rosai. SETTLE is a low-grade malignancy, with potential for late lung, lymph node, and other visceral metastases. The clinicopathologic features of SETTLE overlap significantly with those of synovial sarcoma. Thirteen cases previously diagnosed as "SET…			199
413	JOUR	[The compensatory-adaptive reactions of the thyroid and adrenal adrenergic structures in the postnatal ontogeny of sympathectomized rats].	Markov, V N, Riashchikov, S N, Elkin, A S, Glumova, V A	1994///	Adaptation, Physiological, Adrenal Glands, Aging, Animals, Guanethidine, Histocytochemistry, Male, Microscopy, Electron, Rats, Receptors, Adrenergic, Sympathectomy, Chemical, Sympathetic Nervous System, Thyroid Gland, physiology, ultrastructure	Morfologiia (Saint Petersburg, Russia)	107	rus	7-12	89	96		The study was performed in albino rats treated during first two postnatal weeks with guanetidin isotonic solution injected subcutaneously in dose 20 mg/kg body weight to obtain desympathization. Control animals received similar volume of the solution during equal terms. Thyroid and adrenal glands were studied in 1- and 6-month-old rats both by light and electron microscopes. Serotonin and catecho…			200
755	JOUR	Fresh human amniotic membrane effectively promotes the repair of injured common peroneal nerve.	Zhang, Zhong-Yuan, Yang, Jin, Fan, Zhen-Hai, Wang, Da-Li, Wang, Yu-Ying, Zhang, Tao, Yu, Li-Mei, Yu, Chang-Yin	2019/12//		Neural regeneration research	14	eng	12	2199	2208	10.4103/1673-5374.262596	Suture and autologous nerve transplantation are the primary therapeutic measures for completely severed nerves. However, imbalances in the microenvironment and adhesion of surrounding tissues can affect the quality of nerve regeneration and repair. Previous studies have shown that human amniotic membrane can promote the healing of a variety of tissues. In this study, the right common peroneal ner…			201
354	JOUR	Prednisolone and gastric atrophy.	Wall, A J, Whittingham, S, Mackay, I R, Ungar, B	1968/05//	Achlorhydria, Aged, Anemia, Pernicious, Animals, Antigen-Antibody Reactions, Atrophy, Biopsy, Diabetes Mellitus, Female, Fluorescent Antibody Technique, Gastric Juice, Gastric Mucosa, Gastritis, Humans, Immune Sera, Intrinsic Factor, Male, Middle Aged, Prednisolone, Rats, Regeneration, Reticulocytes, Schilling Test, Stomach, Stomach Diseases, Thyroiditis, Autoimmune, Vitamin B 12, analysis, drug …	Clinical and experimental immunology	3	eng	4	359	366		Eight patients with Addisonian pernicious anaemia were given 20 mg of prednisolone daily for up to 20 weeks. Improvement in absorption of vitamin B(12) as judged by the Schilling test occurred in six cases and was pronounced in four, and there was increased secretion of gastric intrinsic factor in four cases. Gastric biopsies showed regeneration of specialized gastric glands in four cases; chief …			202
289	JOUR	Diagnosis of extraskeletal myxoid chondrosarcoma in the thigh using EWSR1-NR4A3 gene fusion: a case report.	Kobayashi, Hiroki, Kikuta, Kazutaka, Sekita, Tetsuya, Susa, Michiro, Nishimoto, Kazumasa, Sasaki, Aya, Kameyama, Kaori, Sugita, Shintaro, Hasegawa, Tadashi, Nakamura, Masaya, Matsumoto, Morio, Morioka, Hideo	2016/11//	Adult, Bone Plates, Calmodulin-Binding Proteins, Chondrosarcoma, DNA-Binding Proteins, Femur, Fracture Fixation, Intramedullary, Gene Fusion, Humans, Immunohistochemistry, Male, Neoplasms, Connective and Soft Tissue, RNA-Binding Protein EWS, RNA-Binding Proteins, Receptors, Steroid, Receptors, Thyroid Hormone, Sarcoma, Thigh, Treatment Outcome, diagnosis, genetics, methods, pathology, therapy	Journal of medical case reports	10	eng	1	321	321	10.1186/s13256-016-1113-2	BACKGROUND: Extraskeletal myxoid chondrosarcoma is a rare soft tissue sarcoma that has unusual ultrastructural and molecular features. However, unlike other soft tissue sarcomas, it does not have specific clinical symptoms or radiological features, which can make its diagnosis difficult. Nevertheless, extraskeletal myxoid chondrosarcoma has a rare gene fusion (EWSR1-NR4A3) that is useful for maki…			203
342	JOUR	Allele-specific PCR with competitive probe blocking for sensitive and specific detection of BRAF V600E in thyroid fine-needle aspiration specimens.	Smith, G Denice, Zhou, Luming, Rowe, Leslie R, Jarboe, Elke A, Collins, Brian T, Bentz, Joel S, Wittwer, Carl T, Chadwick, Barbara E	2011///	Adolescent, Adult, Aged, Alleles, Biopsy, Fine-Needle, Carcinoma, Carcinoma, Papillary, DNA Mutational Analysis, DNA Primers, Female, Humans, Male, Middle Aged, Polymerase Chain Reaction, Proto-Oncogene Proteins B-raf, Retrospective Studies, Risk, Sensitivity and Specificity, Thyroid Cancer, Papillary, Thyroid Gland, Thyroid Neoplasms, Thyroid Nodule, diagnosis, genetics, metabolism, methods, pat…	Acta cytologica	55	eng	6	576	583	10.1159/000333453	OBJECTIVE: To detect BRAF V600E mutation in thyroid fine-needle aspiration (FNA) slides and needle rinses (NR). STUDY DESIGN: Tumor-enriched DNA was extracted from FNA smears, formalin-fixed paraffin-embedded (FFPE) sections, or NR specimens from 37 patients with confirmed papillary thyroid carcinoma or benign findings. An allele-specific primer selectively amplified the 1799 T>A BRAF mutation wh…			204
448	JOUR	[Iodine distribution (125I and 127I) of a thyroid tissue in a patient with Hashimoto's disease (author's transl)].	Etling, N	1973///	Beta-Globulins, Chromatography, Female, Fluorescent Antibody Technique, Humans, Immune Sera, Immunoelectrophoresis, Immunoglobulin G, Immunoglobulin M, Iodine, Iodine Isotopes, Iodine Radioisotopes, Monoiodotyrosine, Proteins, Thyroid Gland, Thyroiditis, Autoimmune, analysis, immunology, metabolism, surgery	Annales d'endocrinologie	34	fre	3	295	302					205
273	JOUR	Universal Fluorescence Biosensor Platform Based on Graphene Quantum Dots and Pyrene-Functionalized Molecular Beacons for Detection of MicroRNAs.	Zhang, Huan, Wang, Yunsheng, Zhao, Daiwei, Zeng, Dongdong, Xia, Jiaoyun, Aldalbahi, Ali, Wang, Chenguang, San, Lili, Fan, Chunhai, Zuo, Xiaolei, Mi, Xianqiang	2015/08//	Biosensing Techniques, Equipment Design, Equipment Failure Analysis, Fluorescence Resonance Energy Transfer, Graphite, MicroRNAs, Molecular Probe Techniques, Molecular Probes, Pyrenes, Quantum Dots, Reproducibility of Results, Sensitivity and Specificity, analysis, chemistry, genetics, instrumentation	ACS applied materials & interfaces	7	eng	30	16152	16156	10.1021/acsami.5b04773	A novel biosensor platform was developed for detection of microRNAs (miRNAs) based on graphene quantum dots (GQDs) and pyrene-functionalized molecular beacon probes (py-MBs). Pyrene was introduced to trigger specifically fluorescence resonance energy transfer (FRET) between GQDs and fluorescent dyes labeled on py-MBs, and the unique fluorescent intensity change produced a novel signal for detecti…			206
173	JOUR	Peptide Microarray-Based Metal Enhanced Fluorescence Assay for Multiple Profiling of Matrix Metalloproteinases Activities.	Lei, Zhen, Zhang, Hua, Wang, Yaoqi, Meng, Xianying, Wang, Zhenxin	2017/06//	Cell Line, Tumor, Fluorescence Resonance Energy Transfer, Gold, Humans, Limit of Detection, Matrix Metalloproteinases, Metal Nanoparticles, Peptides, Protein Array Analysis, Silicon Dioxide, Silver, Substrate Specificity, Thyroid Cancer, Papillary, Thyroid Gland, Thyroid Neoplasms, analysis, chemistry, metabolism, methods, pathology	Analytical chemistry	89	eng	12	6749	6757	10.1021/acs.analchem.7b01037	Matrix metalloproteinases (MMPs) are closely associated with cancer cell invasion and metastasis. Herein, a fluorescence resonance energy transfer (FRET)-peptide microarray-based metal enhanced fluorescence (MEF) assay is proposed for multiple and sensitive profiling of MMPs activities on a novel Au/Ag@SiO(2) substrate. The Au/Ag@SiO(2) substrate is prepared by electroless deposition of silver on…			207
537	JOUR	Characterization of partial ligation-induced carotid atherosclerosis model using dual-modality molecular imaging in ApoE knock-out mice.	Shin, Ik Jae, Shon, Soo-Min, Schellingerhout, Dawid, Park, Jin-Yong, Kim, Jeong-Yeon, Lee, Su Kyoung, Lee, Dong Kun, Lee, Ho Won, Ahn, Byeong-Cheol, Kim, Kwangmeyung, Kwon, Ick Chan, Kim, Dong-Eog	2013///	Animals, Apolipoproteins E, Atorvastatin, Carotid Artery Diseases, Cell Line, Heptanoic Acids, Ligation, Lithium Chloride, Mice, Mice, Knockout, Molecular Imaging, Pyrroles, adverse effects, etiology, methods, pathology, pharmacology	PloS one	8	eng	9	e73451	e73451	10.1371/journal.pone.0073451	BACKGROUND: Recently, partial ligation of the common carotid artery (CCA) was reported to induce carotid atheromata rapidly in apolipoprotein-E knockout (ApoE(-/-)) mice. We investigated this new atherosclerosis model by using combined matrix-metalloproteinase (MMP) near-infrared fluorescent (NIRF) imaging and macrophage-tracking luciferase imaging. METHODOLOGY AND PRINCIPAL FINDINGS: Partial lig…			208
230	JOUR	From cytomorphology to molecular pathology: maximizing the value of cytology of lymphoproliferative disorders and soft tissue tumors.	Zhang, Songlin, Gong, Yun	2013/10//	Biomarkers, Tumor, Biopsy, Fine-Needle, Cytodiagnosis, Humans, Immunophenotyping, Lymphoproliferative Disorders, Pathology, Molecular, Soft Tissue Neoplasms, Triage, diagnosis, immunology, metabolism, methods	American journal of clinical pathology	140	eng	4	454	467	10.1309/AJCPHDOVGW64FIPB	OBJECTIVES: The field of cytopathology has been rapidly advancing in the era of molecular pathology and personalized medicine. On-site cytologic evaluation for adequacy and triaging specimens for small core biopsy or fine-needle aspiration (FNA) are often required. Cytopathologists face the challenge of how to best triage small specimens for diagnosis, molecular testing, and personalized treatmen…			209
331	JOUR	Solitary fibrous tumor arising in an intrathoracic goiter.	Larsen, Stine Rosenkilde, Godballe, Christian, Krogdahl, Annelise	2010/04//	Antigens, CD34, Goiter, Humans, Male, Middle Aged, Proto-Oncogene Proteins c-bcl-2, Solitary Fibrous Tumors, Thyroid Neoplasms, Tomography, X-Ray Computed, Vimentin, diagnosis, metabolism, surgery	Thyroid : official journal of the American Thyroid Association	20	eng	4	435	437	10.1089/thy.2009.0237	BACKGROUND: Solitary fibrous tumor (SFT) is a rare spindle cell tumor most often found in the mediastinal pleura. Nineteen cases of SFT arising in the thyroid gland have been reported. We report a case of SFT of the thyroid gland with immunohistochemical and cytogenetic investigation. SUMMARY: A 58-year-old man had pulmonary symptoms, thought to be asthma. Computed tomographic scan revealed a lar…			210
496	JOUR	The eye changes of Graves' disease: overview.	Werner, S C	1972/12//	Animals, Basement Membrane, Complement System Proteins, Eye Manifestations, Fluorescent Antibody Technique, Forecasting, Graves Disease, History, 18th Century, History, 19th Century, Humans, Hypophysectomy, Immunoglobulin E, Immunoglobulin G, Immunoglobulin M, Immunoglobulins, Long-Acting Thyroid Stimulator, Pituitary Gland, Thyroid Gland, Thyrotropin, analysis, classification, complications, his…	Mayo Clinic proceedings	47	eng	12	969	974					211
9	JOUR	Superficial synthesis of photoactive copper sulfide quantum dots loaded nano-graphene oxide sheets combined with near infrared (NIR) laser for enhanced photothermal therapy on breast cancer in nursing care management.	Wang, Ling, Yan, Jin	2019/03//	Breast Neoplasms, Cell Death, Copper, Graphite, Humans, Infrared Rays, Lasers, MCF-7 Cells, Nanostructures, Nursing Care, Oxides, Phototherapy, Quantum Dots, Sulfides, chemistry, drug effects, methods, radiation effects, therapy	Journal of photochemistry and photobiology. B, Biology	192	eng		68	73	10.1016/j.jphotobiol.2018.12.024	The purpose of this report was to progress the advancement of nanotechnology combined with near-infrared (NIR) laser-mediated treatment for enhancing efficiency against breast cancer (MCF-7) cells. The physic-chemical interactions and properties of the surface improved nano-Graphene oxide (nGO) sheets with Copper Sulfide (CuS) quantum dots were analyzed by selected exclusive analytical methods. T…			212
135	JOUR	Dual-emission hydrogel nanoparticles with linear and reversible luminescence-response to pH for intracellular fluorescent probes.	Liu, Hou, Zhang, Ying, Zhao, Yue, Zhao, Yueqi, Yang, Xue, Han, Liang, Xin, Jingwei, Yang, Bai, Lin, Quan	2020/05//	Europium, Fluorescence, Fluorescent Dyes, Humans, Hydrogels, Hydrogen-Ion Concentration, Nanoparticles, Polymers, chemistry	Talanta	211	eng		120755	120755	10.1016/j.talanta.2020.120755	A type of dual-emission probe with highly recognizable luminescence-response to pH has been designed. For the prepared core-shell polymeric hydrogel nanoparticles probe (Eu(DBM)(3)Phen doped polystyrene (PS)-co-poly(N-isopropylacrylamide)(PNIPAM)/FITC), the red emission of inner encapsulated europium complexes Eu(DBM)(3)Phen is remained in the hydrophobic PS core and used as a stable reference si…			213
402	JOUR	Distribution of Neospora caninum within the central nervous system and other tissues of six dogs with clinical neosporosis.	Barber, J S, Payne-Johnson, C E, Trees, A J	1996/12//	Animals, Antibodies, Protozoan, Autopsy, Biopsy, Brain, Central Nervous System, Coccidiosis, Dog Diseases, Dogs, Female, Fluorescent Antibody Technique, Indirect, Immunohistochemistry, Male, Muscle, Skeletal, Neospora, Spinal Cord, blood, diagnosis, immunology, isolation & purification, parasitology, pathology, veterinary	The Journal of small animal practice	37	eng	12	568	574	10.1111/j.1748-5827.1996.tb02332.x	Six cases of neosporosis in dogs were diagnosed on the basis of clinical signs, serology and immunohistochemistry. The brains and spinal cords, at several levels, and various other tissues were examined using anti-Neospora caninum serum by an immunoperoxidase technique. Parasite density varied markedly from case to case. Although found most consistently in the cerebrum, parasites were distributed…			214
122	JOUR	Detection of NTRK1/3 Rearrangements in Papillary Thyroid Carcinoma Using Immunohistochemistry, Fluorescent In Situ Hybridization, and Next-Generation Sequencing.	Lee, Yu-Cheng, Chen, Jui-Yu, Huang, Chun-Jui, Chen, Harn-Shen, Yang, An-Hang, Hang, Jen-Fan	2020/12//		Endocrine pathology	31	eng	4	348	358	10.1007/s12022-020-09648-9	NTRK1/3 rearrangements have been reported in 2.3-3.4% of papillary thyroid carcinoma (PTC) and are regarded as potential therapeutic targets. Recently, the application of immunohistochemistry (IHC) to detect NTRK rearrangements has been widely discussed. The current study aimed to characterize the clinicopathological features of PTC with NTRK1/3 fusions, to examine the utility of pan-TRK IHC, and…			215
675	JOUR	Genomic Instability, DNA Alterations and Tumor Eosinophilic Expression in Head and Neck Squamous Cell Carcinoma.	Alrawi, Sadir J, Stoler, Daniel, Tan, Dongfeng, Dayton, Merril, Loree, Thom, Gibbs, John F, Rigual, Nestor, Sait, Sheila, Khoury, Thaer, Hicks, Wesley Jr, Anderson, Garth	2005///		Cancer genomics & proteomics	2	eng	6	307	316		The progression of normal cells to invasive tumor cells has been attributed to the acquisition of numerous mutations in the genome; genomic instability (GI) facilitates the accumulation of these mutations. To study the GI in head and neck squamous cell carcinoma (HNSCC), the genomic instability index (GII) was examined; chromosomal gains and losses were evaluated by array comparative genomic hybr…			216
708	JOUR	Germline polymorphism of codon 727 of human thyroid-stimulating hormone receptor is associated with toxic multinodular goiter.	Gabriel, E M, Bergert, E R, Grant, C S, van Heerden, J A, Thompson, G B, Morris, J C	1999/09//	Adolescent, Adult, Aged, Aged, 80 and over, Amino Acid Sequence, Codon, Cyclic AMP, DNA Fingerprinting, Female, Goiter, Nodular, Humans, Male, Middle Aged, Molecular Sequence Data, Polymerase Chain Reaction, Polymorphism, Genetic, Receptors, Thyrotropin, Sequence Analysis, DNA, Thyrotropin, chemistry, genetics, metabolism, pharmacology	The Journal of clinical endocrinology and metabolism	84	eng	9	3328	3335	10.1210/jcem.84.9.5966	Toxic multinodular goiter (TMNG) represents a frequent cause of endogenous hyperthyroidism, affecting 5-15% of such patients (with higher frequencies reported in iodine-deficient areas of the world). Although mutations of human TSH receptor (hTSHR) have been described in autonomously functioning thyroid nodules (AFTN), the role of such mutations in the pathogenesis of TMNG remains unclear. To sea…			217
145	JOUR	Low-density lipoprotein decorated and indocyanine green loaded silica nanoparticles for tumor-targeted photothermal therapy of breast cancer.	Pan, Hongying, Sun, Yi, Cao, Danxia, Wang, Lihui	2020/03//	Animals, Breast Neoplasms, Drug Delivery Systems, Female, Humans, Indocyanine Green, Lipoproteins, LDL, MCF-7 Cells, Mice, Inbred BALB C, Mice, Nude, Nanoparticles, Particle Size, Phototherapy, Receptors, LDL, Silicon Dioxide, chemistry, metabolism, methods, pathology, therapy	Pharmaceutical development and technology	25	eng	3	308	315	10.1080/10837450.2019.1684944	Photothermal therapy (PTT) is well recognized to be a highly reliable way to treat cancer effectively. Nevertheless, the poor tumor targetability and the inferior stability of PTT agents are two remaining difficulties in PTT. As a result, in this study, the silica nanoparticles (SLN) were coated by low-density lipoprotein (LDL) to develop a multifunctional platform (LDL/SLN) to specifically targe…			218
85	JOUR	Expression of NIS, VEGF-A and Thyroid Autoantibody in Papillary Thyroid Carcinoma with or without Hashimoto's Disease.	Ma, Ye, He, Junyi, Shen, Na, Guo, Ruosheng	2019///	Autoantibodies, Female, Hashimoto Disease, Humans, Male, Symporters, Thyroid Cancer, Papillary, Vascular Endothelial Growth Factor A, metabolism	ORL; journal for oto-rhino-laryngology and its related specialties	81	eng	5-6	281	286	10.1159/000501620	BACKGROUND: Since the incidence of papillary thyroid carcinoma (PTC) combined with Hashimoto's thyroiditis (HT) has increased year by year, but the mechanism is still unknown, the goal of this study was to investigate the expression of Na+/I- symporter (NIS), vascular endothelial growth factor (VEGF)-A and thyroid autoantibodies in HT combined with PTC, and to explore the relationship between HT …			219
593	JOUR	Comparison of analytic performances of Cellsearch and iFISH approach in detecting circulating tumor cells.	Sheng, Yuan, Wang, Ting, Li, Hengyu, Zhang, Zhenzhen, Chen, Jianghao, He, Chenyang, Li, Yongping, Lv, Yonggang, Zhang, Juliang, Xu, Cheng, Wang, Zhen, Huang, Chen, Wang, Ling	2017/01//	Adolescent, Adult, Aged, Biomarkers, Tumor, Breast Neoplasms, Chromosomes, Human, Epithelial Cell Adhesion Molecule, Female, Fluorescent Antibody Technique, Humans, In Situ Hybridization, Fluorescence, Karyotype, Karyotyping, Keratins, Middle Aged, Neoplastic Cells, Circulating, Predictive Value of Tests, Receptor, ErbB-2, Reproducibility of Results, Vimentin, Young Adult, blood, chemistry, genet…	Oncotarget	8	eng	5	8801	8806	10.18632/oncotarget.6688	Circulating tumor cells (CTCs) have been widely used to predict the prognosis of breast cancer patients. The aim of the present study was to compare the performances of Cellsearch and immunostaining-fluorescence in situ hybridization (iFISH) in detecting CTCs in breast cancer patients. Forty-five newly diagnosed breast cancer patients and 14 healthy donors were recruited and their CTCs were detec…			220
454	GEN	Donor origin of Graves disease in a BMT recipient: evidence from FISH studies of thyroid tissue.	Drabko, K, Winnicka, D, Gaworczyk, A, BeÅ-Skowronek, I, Skomra, D, Kowalczyk, J R	2006/04//	Adolescent, Adult, Anemia, Aplastic, Bone Marrow Transplantation, Female, Genetic Predisposition to Disease, Graves Disease, Humans, In Situ Hybridization, Fluorescence, Karyotyping, Lymphocytes, Male, Thyroid Gland, Tissue Donors, Transplantation Conditioning, adverse effects, complications, etiology, genetics, metabolism, methods, pathology, therapy	Bone marrow transplantation	37	eng	8	789	791	10.1038/sj.bmt.1705316				221
302	JOUR	Thyroid antibodies in spontaneous autoimmune thyroiditis in the Buffalo rat.	Noble, B, Yoshida, T, Rose, N R, Bigazzi, P E	1976/11//	Animals, Autoantibodies, Autoimmune Diseases, Cell Migration Inhibition, Disease Models, Animal, Female, Fluorescent Antibody Technique, Hemagglutination Tests, Hypersensitivity, Delayed, Male, Rats, Thymectomy, Thymus Gland, Thyroid Gland, Thyroiditis, immunology, transplantation	Journal of immunology (Baltimore, Md. : 1950)	117	eng	5 Pt 1	1447	1455		Thyroid antibodies in the sera of BUF rats are closely correlated with spontaneous thyroiditis; their detection may facilitate the study of this animal model of organ-specific autoimmunity. In a group of 115 retired BUF breeders (females older than 1 year), 26% had mononuclear cell infiltration of the thyroid and high titers of thyroid antibodies detectable by indirect immunofluorescence (IF) and…			222
591	JOUR	Clinical significance of TTF-1 protein expression and TTF-1 gene amplification in lung adenocarcinoma.	Barletta, Justine A, Perner, Sven, Iafrate, A John, Yeap, Beow Y, Weir, Barbara A, Johnson, Laura A, Johnson, Bruce E, Meyerson, Matthew, Rubin, Mark A, Travis, William D, Loda, Massimo, Chirieac, Lucian R	2009/08//	Adenocarcinoma, Adult, Aged, Aged, 80 and over, Female, Gene Amplification, Humans, Immunohistochemistry, In Situ Hybridization, Fluorescence, Lung Neoplasms, Male, Middle Aged, Nuclear Proteins, Thyroid Nuclear Factor 1, Transcription Factors, genetics, metabolism	Journal of cellular and molecular medicine	13	eng	8B	1977	1986	10.1111/j.1582-4934.2008.00594.x	The majority of lung adenocarcinomas express the lineage-specific thyroid transcription factor-1 (TTF-1). We recently reported that in a subset of lung adenocarcinomas the TTF-1 gene is amplified. Although the prognostic significance of TTF-1 expression has been previously investigated, the significance of TTF-1 amplification has not been established. We studied 89 consecutive patients with lung …			223
695	JOUR	Screening of surface markers on rat intestinal mucosa microfold cells by using laser capture microdissection combined with protein chip technology.	Zhao, Junyong, Li, Xiaoyu, Luo, Qifeng, Xu, Lei, Chen, Lei, Chai, Li, Huang, Yixiang, Fang, Lin	2014///		International journal of clinical and experimental medicine	7	eng	4	932	939		OBJECTIVE: The objective of this research was to investigate the possibility of screening surface markers on rat intestinal mucosa microfold cells (M cells) by using laser capture microdissection (LCM) combined with protein chip technology. METHODS: We labeled rat intestinal mucosa microfold cells with Ulex europaeus agglutinin (UEA)-1 antibody and visualized these by immunofluorescence staining.…			224
732	JOUR	The impact of BCL-2/MYC protein expression and gene abnormality on primary central nervous system diffuse large B-cell lymphoma.	Yin, Wenjuan, Xia, Xianghou, Wu, Meijuan, Yang, Haiyang, Zhu, Xiu, Sun, Wenyong, Ge, Minghua	2019///		International journal of clinical and experimental pathology	12	eng	6	2215	2223		We determined the effects of the BCL-2, C-MYC, and BCL-6 gene aberrations and their protein expressions on the prognosis of primary central nervous system diffuse B-cell lymphoma (PCNS-DLBCL) patients. The pathological and clinical information of 47 immunocompetent patients was reviewed, and the immunohistochemical markers for BCL2, CD10, BCL6, MUM1, and MYC were reevaluated. Genetic abnormalitie…			225
566	JOUR	Vaccinia virus GLV-1h153 is a novel agent for detection and effective local control of positive surgical margins for breast cancer.	Gholami, Sepideh, Chen, Chun-Hao, Belin, Laurence J, Lou, Emil, Fujisawa, Sho, Antonacci, Caroline, Carew, Amanda, Chen, Nanhai G, De Brot, Marina, Zanzonico, Pat B, Szalay, Aladar A, Fong, Yuman	2013/03//	Animals, Breast Neoplasms, Cell Death, Female, Green Fluorescent Proteins, Humans, Immunoenzyme Techniques, Mice, Mice, Nude, Neoplasm, Residual, Positron-Emission Tomography, Symporters, Vaccinia virus, Virus Replication, genetics, metabolism, pathology, physiology, prevention & control, surgery, virology	Breast cancer research : BCR	15	eng	2	R26	R26	10.1186/bcr3404	INTRODUCTION: Surgery is currently the definitive treatment for early-stage breast cancer. However, the rate of positive surgical margins remains unacceptably high. The human sodium iodide symporter (hNIS) is a naturally occurring protein in human thyroid tissue, which enables cells to concentrate radionuclides. The hNIS has been exploited to image and treat thyroid cancer. We therefore investiga…			226
346	JOUR	Adhesion molecule expression in Graves' thyroid glands; potential relevance of granule membrane protein (GMP-140) and intercellular adhesion molecule-1 (ICAM-1) in the homing and antigen presentation processes.	Miyazaki, A, Mirakian, R, Bottazzo, G F	1992/07//	Cell Adhesion Molecules, Cell Movement, E-Selectin, Endothelium, Fluorescent Antibody Technique, Graves Disease, Humans, Intercellular Adhesion Molecule-1, Monocytes, P-Selectin, Platelet Membrane Glycoproteins, Thyroid Gland, Up-Regulation, Vascular Cell Adhesion Molecule-1, biosynthesis, drug therapy, immunology, metabolism, physiology, surgery	Clinical and experimental immunology	89	eng	1	52	57	10.1111/j.1365-2249.1992.tb06876.x	To assess the potential role of adhesion molecules in the pathogenesis of Graves' disease, we examined the expression of several of these adhesion molecules, including intercellular adhesion molecule-1 (ICAM-1), vascular cell adhesion molecule (VCAM-1) and granule membrane protein-140 (GMP-140), in sections of Graves' thyroid glands and control thyroids, using immunohistochemical techniques. Up-r…			227
372	JOUR	Fundus autofluorescence findings of acute posterior multifocal placoid pigment epitheliopathy with chronic thyroiditis and splenectomy.	Katagiri, Satoshi, Ohkuma, Yasuhiro, Hayashi, Takaaki, Gekka, Tamaki, Tsuneoka, Hiroshi	2015/03//	Chronic Disease, Female, Fluorescein Angiography, Fundus Oculi, Humans, Middle Aged, Retinal Diseases, Retinal Pigment Epithelium, Splenectomy, Thyroiditis, adverse effects, complications, diagnosis, etiology, pathology	Clinical & experimental optometry	98	eng	2	186	189	10.1111/cxo.12208				228
747	JOUR	Nuclear and cytoplasmic accumulation of Ep-ICD is frequently detected in human epithelial cancers.	Ralhan, Ranju, He, Helen C-H, So, Anthony K-C, Tripathi, Satyendra C, Kumar, Manish, Hasan, Md Raghibul, Kaur, Jatinder, Kashat, Lawrence, MacMillan, Christina, Chauhan, Shyam Singh, Freeman, Jeremy L, Walfish, Paul G	2010/11//	Adolescent, Adult, Aged, Aged, 80 and over, Antigens, Neoplasm, Binding Sites, Cell Adhesion Molecules, Cell Line, Tumor, Cell Nucleus, Cytoplasm, Epithelial Cell Adhesion Molecule, Epithelial Cells, Female, Fluorescent Antibody Technique, Humans, Immunohistochemistry, Male, Middle Aged, Neoplasm Staging, Neoplasms, ROC Curve, diagnosis, metabolism, pathology	PloS one	5	eng	11	e14130	e14130	10.1371/journal.pone.0014130	BACKGROUND: We previously demonstrated that nuclear and cytoplasmic accumulation of the intracellular domain (Ep-ICD) of epithelial cell adhesion molecule (EpCAM) accompanied by a reciprocal reduction of its extracellular domain (EpEx), occurs in aggressive thyroid cancers. This study was designed to determine whether similar accumulation of Ep-ICD is a common event in other epithelial cancers. M…			229
741	JOUR	Quantum dot-based immunofluorescent imaging and quantitative detection of DNER and prognostic value in prostate cancer.	Wang, Lijun, Wu, Qi, Zhu, Shan, Li, Zhiyu, Yuan, Jingping, Liu, Lin, Yu, Dehua, Xu, Zhiliang, Li, Juanjuan, Sun, Shengrong, Wang, Changhua	2018///	Adult, Aged, Biomarkers, Tumor, Bone Neoplasms, Disease-Free Survival, Fluorescent Antibody Technique, Gene Expression Regulation, Neoplastic, Humans, Male, Middle Aged, Neoplasm Metastasis, Nerve Tissue Proteins, Prognosis, Prostatic Neoplasms, Quantum Dots, Receptors, Cell Surface, diagnostic imaging, genetics, isolation & purification, pathology, secondary	Cancer biomarkers : section A of Disease markers	22	eng	4	683	691	10.3233/CBM-171107	DNER, Delta/Notch-like epidermal growth factor (EGF)-related receptor, is a neuron-specific transmembrane protein carrying extracellular EGF-like repeats. The prognostic value of DNER in prostate cancer has not been evaluated. Here we showed that the up-regulation of DNER protein was observed in prostate cancer detected by immunohistochemistry (IHC) and quantum dot-based immunofluorescent imaging…			230
514	JOUR	Auto-immune annular erythema. A variant of lupus erythematosus?	Rekant, S I, Becker, L E	1973/03//	Antibodies, Antinuclear, Autoimmune Diseases, Biopsy, Blood Protein Electrophoresis, Complement Fixation Tests, DNA, Electrophoresis, Erythema, Female, Fluorescent Antibody Technique, Humans, Hydrochlorothiazide, Hydroxychloroquine, Immunoglobulins, Latex Fixation Tests, Lupus Erythematosus, Systemic, Middle Aged, Thyroid Hormones, adverse effects, analysis, diagnosis, drug therapy, metabolism, p…	Archives of dermatology	107	eng	3	424	426					231
635	JOUR	Blockade of the Notch1/Jagged1 pathway in Kupffer cells aggravates ischemia-reperfusion injury of orthotopic liver transplantation in mice.	Bai, He, Wen, Jian, Gong, Jian-Ping, Wu, Hao, Yuan, Fang-Chao, Cao, Ding, Wu, Ya-Kun, Lai, Xing, Wang, Meng-Hao	2019/06//	Animals, Apoptosis, Cells, Cultured, Clodronic Acid, Inflammation, Jagged-1 Protein, Kupffer Cells, Liver, Liver Transplantation, Male, Mice, Mice, Inbred BALB C, NF-kappa B, PTEN Phosphohydrolase, Proto-Oncogene Proteins c-akt, RNA Interference, RNA, Small Interfering, Receptor, Notch1, Reperfusion Injury, Toll-Like Receptor 4, Transcription Factor HES-1, adverse effects, antagonists & inhibitor…	Autoimmunity	52	eng	4	176	184	10.1080/08916934.2019.1637424	Liver ischemia-reperfusion injury (IRI) represents a risk factor for early graft dysfunction and an obstacle to expanding donor pool in orthotopic liver transplantation (OLT). Kupffer cells (KCs) are the largest antigen-presenting cell (APC) group and the primary modulators of inflammation in liver tissues. The vital role of Notch1/Jagged1 pathway in mouse OLT model has been reported, however, it…			232
316	JOUR	Regulation of sodium-iodide-symporter gene expression in human thyrocytes measured by real-time polymerase chain reaction.	Wagner, S, Aust, G, Schott, M, Scherbaum, W A, Feldkamp, J, Seissler, J	2002/11//	Biopsy, Blotting, Northern, Cells, Cultured, DNA, Complementary, Gene Expression, Goiter, Humans, RNA, RNA, Messenger, Reverse Transcriptase Polymerase Chain Reaction, Symporters, Thyroid Gland, Thyrotropin, biosynthesis, cytology, genetics, isolation & purification, metabolism, pharmacology	Experimental and clinical endocrinology & diabetes : official journal, German Society of Endocrinology [and] German Diabetes Association	110	eng	8	398	402	10.1055/s-2002-36426	The sodium-iodide-symporter (NIS) plays a key role in iodination, the first step in the biosynthesis of the thyroid hormones, and is thought to be critically involved in several thyroid disorders associated with altered iodine up-take. To elucidate the pathogenic role of NIS in these diseases a sensitive technique is needed to measure human NIS gene expression. We established a real time RT-PCR f…			233
356	JOUR	Upregulation of collagen type I gene expression in the ventricular myocardium of thyroidectomized male and female rats.	Klein, L E, Sigel, A V, Douglas, J A, Eghbali-Webb, M	1996/01//	Animals, Body Weight, Collagen, Female, Fluorescent Antibody Technique, Gene Expression Regulation, Heart, Heart Ventricles, Male, Myocardium, Organ Size, Procollagen, RNA, Messenger, Rats, Rats, Sprague-Dawley, Reference Values, Sex Characteristics, Sex Factors, Thyroidectomy, Thyroxine, Triiodothyronine, biosynthesis, blood, cytology, metabolism, physiology	Journal of molecular and cellular cardiology	28	eng	1	33	42	10.1006/jmcc.1996.0004	It is established that thyroxine-induced ventricular hypertrophy is associated with downregulation of collagen type I gene expression and increased collagen turnover in the ventricular tissue. The present study was undertaken to test the hypothesis that circulating thyroid hormones may have a regulatory impact on the biosynthesis of the collagen matrix in the heart. To this end, we determined col…			234
451	JOUR	[Serotonin concentration in the hypothalamus following alteration of pituitary thyrotropic function].	Mamina, V V	1976/07//	Animals, Chlorpromazine, Ganglia, Autonomic, Histocytochemistry, Hypothalamus, Male, Methylthiouracil, Pituitary Gland, Pituitary Gland, Anterior, Rabbits, Serotonin, Thyroidectomy, Thyroiditis, Thyrotropin, metabolism, pharmacology, physiology	Biulleten' eksperimental'noi biologii i meditsiny	82	rus	7	772	774		The hypothalamic serotonin content in the altered pituitary thyrotropic function was determined in mature male rabbits by the fluorescent method. No distinct correlation was found between the intensity of the pituitary thyrotropic function and serotonin level in the hypothalamus. Intensification of the hypophysial thyrotropic function under the effect of 6-methylthiouracil or partial thyroidectom…			235
728	JOUR	Impaired enzymatic reactive aldehyde-detoxifying capacity and glutathione peroxidase activity in the aged human arterial tissue.	Lapenna, Domenico, Ciofani, Giuliano, Obletter, Gabriele, Pierdomenico, Sante Donato, Cipollone, Francesco, Cotellese, Roberto, Cieri, Massimo, Porreca, Ettore	2019/02//	Adult, Aged, Aged, 80 and over, Aging, Aldehyde Dehydrogenase, Aldehyde Reductase, Arteries, Case-Control Studies, Female, Glutathione Peroxidase, Glutathione Transferase, Humans, Lipid Peroxidation, Male, Oxidative Stress, enzymology, metabolism	Experimental gerontology	116	eng		7	13	10.1016/j.exger.2018.11.013	It is not known whether aging alters the enzymatic reactive aldehyde- and lipid hydroperoxide-detoxifying capacity of the human arterial tissue favoring vascular oxidative stress. To address this issue, we studied the specific enzymatic activities of class 1, 2 and 3 aldehyde dehydrogenase (ALDH1, ALDH2 and ALDH3), glutathione Sâtransferase (isozyme A4-4, GSTA4-4) and aldose reductase (AR), nam…			236
237	JOUR	Fine-needle aspiration features of extraskeletal myxoid chondrosarcoma: A study of cytological and molecular features.	Santos, Filipa, Martins, Carmo, Lemos, Maria M	2018/11//	Aged, Biomarkers, Tumor, Biopsy, Fine-Needle, Chondrosarcoma, DNA-Binding Proteins, Female, Humans, Male, Middle Aged, Neoplasms, Connective and Soft Tissue, Receptors, Steroid, Receptors, Thyroid Hormone, genetics, metabolism, pathology	Diagnostic cytopathology	46	eng	11	950	957	10.1002/dc.24028	BACKGROUND: Extraskeletal myxoid chondrosarcoma (EMC) is a tumor of uncertain differentiation. Few data are available regarding its cytomorphological features in fine-needle aspiration (FNA). Specific cytogenetic alterations involving the NR4A3 gene are found in EMC and can be identified in FNA samples. METHODS: We retrospectively reviewed 14 FNAs performed in 11 patients with an EMC; 10 FNAs wer…			237
510	JOUR	ROS1 Rearrangement in Thyroid Cancer.	Ritterhouse, Lauren L, Wirth, Lori J, Randolph, Gregory W, Sadow, Peter M, Ross, Douglas S, Liddy, Whitney, Lennerz, Jochen K	2016/06//	Carcinoma, Papillary, DNA Mutational Analysis, Female, Gene Rearrangement, Humans, Neoplasm Staging, Protein-Tyrosine Kinases, Proto-Oncogene Proteins, Thyroid Neoplasms, Treatment Outcome, Young Adult, genetics, pathology, surgery	Thyroid : official journal of the American Thyroid Association	26	eng	6	794	797	10.1089/thy.2016.0101	BACKGROUND: Aberrations involving the ROS1 gene have not been reported in thyroid cancer. Here, a case of ROS1-associated thyroid cancer with unique and aggressive characteristics is presented. PATIENT FINDINGS: A 24-year-old athlete presented with a 3.5âcm left paramedian upper neck mass. Open biopsy demonstrated a papillary thyroid carcinoma arising in the pyramidal lobe. Additional imaging r…			238
16	JOUR	TMTP1-modified Indocyanine Green-loaded Polymeric Micelles for Targeted Imaging of Cervical Cancer and Metastasis Sentinel Lymph Node in vivo.	Wei, Rui, Jiang, Guiying, Lv, MengQin, Tan, Songwei, Wang, Xueqian, Zhou, Ying, Cheng, Teng, Gao, Xueqin, Chen, Xi, Wang, Wei, Zou, Chenming, Li, Fei, Ma, Xiangyi, Hu, Junbo, Ma, Ding, Luo, Danfeng, Xi, Ling	2019///	Animals, Female, Fluorescent Dyes, Humans, Indocyanine Green, Lung Neoplasms, Lymphatic Metastasis, Mice, Mice, Inbred BALB C, Mice, Nude, Oligopeptides, Optical Imaging, Polymers, Sentinel Lymph Node, Uterine Cervical Neoplasms, chemistry, diagnostic imaging, instrumentation, metabolism, methods, pathology, secondary	Theranostics	9	eng	24	7325	7344	10.7150/thno.35346	Metastasis is one of the most threatening aspects of cervical cancer. We developed a method to intraoperatively map the primary tumor, metastasis and metastatic sentinel lymph nodes (SLNs), providing real-time intraoperative guidance in cervical cancer. Methods: TMTP1, a tumor metastasis targeting peptide, was employed to modify the indocyanine green (ICG)-loaded poly (ethylene glycol)- poly (lac…			239
615	JOUR	Thyroid hormone action on rat calvarial sutures.	Akita, S, Nakamura, T, Hirano, A, Fujii, T, Yamashita, S	1994///	Animals, Bone Density, Cranial Sutures, Female, Femur, Lumbar Vertebrae, Rats, Rats, Wistar, Time Factors, Triiodothyronine, anatomy & histology, drug effects, metabolism, pharmacology	Thyroid : official journal of the American Thyroid Association	4	eng	1	99	106	10.1089/thy.1994.4.99	To clarify the effect of thyroid hormone on the calvarial sutures, the morphology, histology, and bone mineral density were analyzed in thyroid hormone-injected rats. A total of 80 female Wistar rats at the age of 10 days were divided into 2 groups; the triiodothyronine (T3)-treated rats (n = 40, T3 100 micrograms/kg body weight/day) were maintained under the same conditions as controls (n = 40, …			240
466	JOUR	[Hormonal regulation of the function of the myocyte intracellular membranes under radiation influence].	Shafranovskaia, E V, Bagel', I M, Rolevich, I V	2004///	Animals, Calcium, Dose-Response Relationship, Radiation, Fluorescence, Gamma Rays, Hormones, Intracellular Membranes, Lipid Bilayers, Male, Muscle Cells, Rats, Sarcoplasmic Reticulum, Thyroid Gland, Thyroidectomy, Thyroxine, Tryptophan, chemistry, drug effects, metabolism, pharmacology, radiation effects, surgery	Radiatsionnaia biologiia, radioecologiia	44	rus	3	319	323		It was shown that the experimental hypofunction of thyroid, induced by thyroidectomy and strong gamma-irradiation with a dose of 1 Gy lead to disturbance of function and structure of membranes of sarcoplasmic reticulum of myocites in rats. Introduction in vivo of L-thyroxine rose functional capacity of membranes with insignificaut changes in their lipid bilayer.			241
396	JOUR	A study of autoimmune gastritis in the postpartum period and at a 5-year follow-up.	Burman, P, KÃ¤mpe, O, Kraaz, W, LÃ¶Ã¶f, L, Smolka, A, Karlsson, A, Karlsson-Parra, A	1992/09//	Adenosine Triphosphatases, Adult, Antibodies, Autoimmune Diseases, Biopsy, Female, Fluorescent Antibody Technique, Follow-Up Studies, Gastric Mucosa, Gastrins, Gastritis, H(+)-K(+)-Exchanging ATPase, Humans, Immunoglobulin A, Immunoglobulin G, Iron, Pepsinogens, Pregnancy, Puerperal Disorders, Thyroiditis, Autoimmune, Vitamin B 12, analysis, blood, immunology, pathology	Gastroenterology	103	eng	3	934	942	10.1016/0016-5085(92)90027-v	The presence of autoimmune gastritis was investigated in 54 women with postpartum thyroiditis. Parietal cell antibodies (PCA) specific against H+, K(+)-adenosine triphosphatase (EC 3.6.1.36) were found in 18 women during pregnancy; in 10 of them, a 2-9-fold increase in the PCA level was observed in the postpartum period. At a 5-year follow-up, the initially PCA-positive women still had elevated a…			242
478	JOUR	Effect of calcitonin on the rates of bone formation and resorption in the rat.	Baylink, D, Morey, E, Rich, C	1969/02//	Animals, Anthraquinones, Bone Resorption, Calcitonin, Chlortetracycline, Demeclocycline, Depression, Chemical, Hypocalcemia, Male, Microscopy, Fluorescence, Osteoclasts, Osteogenesis, Parathyroid Glands, Periosteum, Rats, Sulfonic Acids, Thyroidectomy, Tibia, chemically induced, drug effects, pharmacology, physiology, surgery	Endocrinology	84	eng	2	261	269	10.1210/endo-84-2-261				243
595	JOUR	Cardiolipins Are Biomarkers of Mitochondria-Rich Thyroid Oncocytic Tumors.	Zhang, Jialing, Yu, Wendong, Ryu, Seung Woo, Lin, John, Buentello, Gerardo, Tibshirani, Robert, Suliburk, James, Eberlin, Livia S	2016/11//	Biomarkers, Cardiolipins, Humans, Mitochondria, Thyroid Neoplasms, analysis, blood, diagnosis, metabolism, pathology	Cancer research	76	eng	22	6588	6597	10.1158/0008-5472.CAN-16-1545	Oncocytic tumors are characterized by an excessive eosinophilic, granular cytoplasm due to aberrant accumulation of mitochondria. Mutations in mitochondrial DNA occur in oncocytic thyroid tumors, but there is no information about their lipid composition, which might reveal candidate theranostic molecules. Here, we used desorption electrospray ionization mass spectrometry (DESI-MS) to image and ch…			244
569	JOUR	Generation and identification of a thyroid cancer cell line with stable expression of CCDC67 and luciferase reporter genes.	Zhang, Lele, Wang, Longlong, Lei, Mengyuan, Ma, Runsheng, Yu, Fangqin, Liu, Chenguang, Yin, Detao	2019/11//		Oncology letters	18	eng	5	4495	4502	10.3892/ol.2019.10839	Coiled-coil domain containing 67 (CCDC67) gene is a tumor suppressor gene that exhibits a significant inhibitory effect on a variety of tumors. Our previous study demonstrated that the upregulation of CCDC67 gene in TPC-1 cells inhibited cell proliferation, migration and invasion, and promoted apoptosis in vitro. However, due to the lack of a suitable cell tool, these results were not validated i…			245
677	JOUR	Monocarboxylate transporters in breast cancer and adipose tissue are novel biomarkers and potential therapeutic targets.	Li, Zhiyu, Wu, Qi, Sun, Si, Wu, Juan, Li, Juanjuan, Zhang, Yimin, Wang, Changhua, Yuan, Jingping, Sun, Shengrong	2018/07//	Adipose Tissue, Aged, Biomarkers, Tumor, Breast Neoplasms, Disease Progression, Female, Gene Expression Regulation, Neoplastic, Humans, Middle Aged, Molecular Targeted Therapy, Monocarboxylic Acid Transporters, Muscle Proteins, Prognosis, Survival Analysis, Symporters, genetics, metabolism, pathology	Biochemical and biophysical research communications	501	eng	4	962	967	10.1016/j.bbrc.2018.05.091	Monocarboxylate transporters (MCTs) are transmembrane proteins that control the lactate metabolism and associated with poor prognosis in solid tumours including breast cancer (BC). This study aimed to evaluate the clinical and prognostic value of MCTs used by immunohistochemistry and quantum dots-based fluorescent imaging technique in BC and surrounding stroma with emphasis on the interaction bet…			246
571	JOUR	Break-apart interphase fluorescence in situ hybridization assay in papillary thyroid carcinoma: on the road to optimizing the cut-off level for RET/PTC rearrangements.	Colato, Chiara, Vicentini, Caterina, Cantara, Silvia, Pedron, Serena, Brazzarola, Paolo, Marchetti, Ivo, Di Coscio, Giancarlo, Chilosi, Marco, Brunelli, Matteo, Pacini, Furio, Ferdeghini, Marco	2015/05//	Adolescent, Adult, Aged, Carcinoma, Carcinoma, Papillary, Child, Cohort Studies, Female, Gene Rearrangement, Humans, In Situ Hybridization, Fluorescence, Male, Middle Aged, Paraffin Embedding, Polymerase Chain Reaction, Proto-Oncogene Proteins c-ret, Reagent Kits, Diagnostic, Reference Standards, Thyroid Cancer, Papillary, Thyroid Neoplasms, Tissue Fixation, Young Adult, genetics, methods, pathol…	European journal of endocrinology	172	eng	5	571	582	10.1530/EJE-14-0930	OBJECTIVE: Chromosomal rearrangements of the RET proto-oncogene is one of the most common molecular events in papillary thyroid carcinoma (PTC). However, their pathogenic role and clinical significance are still debated. This study aimed to investigate the prevalence of RET/PTC rearrangement in a cohort of BRAF WT PTCs by fluorescence in situ hybridization (FISH) and to search a reliable cut-off …			247
226	JOUR	Multispectral microscopy and cell segmentation for analysis of thyroid fine needle aspiration cytology smears.	Wu, Xuqing, Thigpen, James, Shah, Shishir K	2009///	Algorithms, Artificial Intelligence, Biopsy, Fine-Needle, Humans, Image Enhancement, Image Interpretation, Computer-Assisted, Microscopy, Fluorescence, Multiphoton, Pattern Recognition, Automated, Reproducibility of Results, Sensitivity and Specificity, Thyroid Neoplasms, methods, pathology	Annual International Conference of the IEEE Engineering in Medicine and Biology Society. IEEE Engineering in Medicine and Biology Society. Annual International Conference	2009	eng		5645	5648	10.1109/IEMBS.2009.5333764	This paper discusses the needs for automated tools to aid in the diagnosis of thyroid nodules based on analysis of fine needle aspiration cytology smears. While conventional practices rely on the analysis of grey scale or RGB color images, we present a multispectral microscopy system that uses thirty-one spectral bands for analysis. Discussed are methods and results for system calibration and cel…			248
322	JOUR	Sympathetic regulation of thyroid hormone secretion.	Melander, A, Ericson, L E, Sundler, F	1974/01//	Animals, Dihydroxyphenylalanine, Dopamine, Endocytosis, Epinephrine, Ganglia, Autonomic, Humans, Iodine, Iodine Radioisotopes, Isoproterenol, Mice, Microscopy, Fluorescence, Norepinephrine, Serotonin, Species Specificity, Sympathectomy, Sympathetic Nervous System, Thyroglobulin, Thyroid Gland, Thyroid Hormones, Tritium, blood, drug effects, metabolism, pharmacology, physiology	Life sciences	14	eng	2	237	246	10.1016/0024-3205(74)90053-8				249
166	JOUR	Primary thyroid biphasic synovial sarcoma and synchronous papillary carcinoma: report of a remarkable case.	Nicola, M, Onorati, M, Bertola, G, Collini, P, FascÃ¬, A I, Di Nuovo, F	2018/09//	Adult, Biomarkers, Tumor, Biopsy, Fine-Needle, Diagnosis, Differential, Female, Gene Rearrangement, Humans, In Situ Hybridization, Fluorescence, Neoplasms, Multiple Primary, Oncogene Proteins, Fusion, Predictive Value of Tests, Sarcoma, Synovial, Thyroid Cancer, Papillary, Thyroid Neoplasms, Thyroid Nodule, Thyroidectomy, Tumor Burden, analysis, chemistry, genetics, pathology, surgery	Pathologica	110	eng	2	106	110		Synovial Sarcoma (SS) is the fourth most common soft tissue sarcoma, characterized by translocation t(X;18) (p11.2;q11.2). Although its histological features have been extensively described, this entity is characterized by a wide morphological spectrum so that the recognition can be very challenging at atypical anatomical localization, like the thyroid. We describe a case of a 42-ys-old female pa…			250
725	JOUR	Second and third trimester amniotic fluid mesenchymal stem cells can repopulate a de-cellularized lung scaffold and express lung markers.	Vadasz, Stephanie, Jensen, Todd, Moncada, Camilo, Girard, Eric, Zhang, Fan, Blanchette, Alex, Finck, Christine	2014/11//	Amniotic Fluid, Animals, Biomarkers, Cell Differentiation, Collagen, Drug Combinations, Extracellular Matrix, Female, Flow Cytometry, Fluorescent Antibody Technique, Humans, Laminin, Lung, Mesenchymal Stem Cells, Organogenesis, Phenotype, Pregnancy, Pregnancy Trimester, Second, Pregnancy Trimester, Third, Proteoglycans, Rats, Tissue Scaffolds, cytology, embryology, physiology	Journal of pediatric surgery	49	eng	11	1554	1563	10.1016/j.jpedsurg.2014.04.006	BACKGROUND/PURPOSE: This study examined the potential of amniotic fluid mesenchymal stem cells (AF-MSCs) to generate lung precursor cells in vitro and on a xenologous three-dimensional de-cellularized lung scaffold. METHODS: AF-MSCs were isolated from human amniotic fluid obtained from 17-37 weeks gestation. Lung differentiation was induced on Matrigel or on de-cellularized rat lungs intra-trache…			251
495	JOUR	Thyroid hormone secretion. Its regulation by intrathyroidal amines.	Melander, A	1971///	Adrenalectomy, Amines, Animals, Catecholamines, Female, Fluorometry, Histamine, Histocytochemistry, Hypophysectomy, Iodine Isotopes, Male, Mast Cells, Mice, Microscopy, Electron, Microscopy, Fluorescence, Rats, Serotonin, Sympathetic Nervous System, Thyroid Gland, Thyroid Hormones, Thyrotropin, analysis, antagonists & inhibitors, drug effects, metabolism, pharmacology, physiology	Acta physiologica Scandinavica. Supplementum	370	eng		1	31	10.1111/j.1748-1716.1971.tb05137.x				252
630	JOUR	Identification of differentially expressed genes in papillary thyroid carcinomas with and without rearrangements of the tyrosine kinase receptors RET and/or NTRK1.	Musholt, Thomas J, Brehm, Christoph, Hanack, Julia, von Wasielewski, Reinhard, Musholt, Petra B	2006/03//	Adolescent, Adult, Aged, Carcinoma, Papillary, Cell Proliferation, Disease Progression, Down-Regulation, Female, Gene Expression Profiling, Gene Expression Regulation, Neoplastic, Gene Rearrangement, Humans, Male, Middle Aged, Proto-Oncogene Proteins c-ret, Receptor, trkA, Thyroid Neoplasms, Up-Regulation, biosynthesis, genetics	The Journal of surgical research	131	eng	1	15	25	10.1016/j.jss.2005.08.013	BACKGROUND: The transforming capacities of RET and/or NTRK1 chimeric oncogenes as well as the molecular background of non-rearranged papillary thyroid carcinomas (PTCs) remain to be elucidated. To assess altered gene expression, we examined PTCs with and without tyrosine kinase receptor rearrangements by mRNA differential display (DD). MATERIALS AND METHODS: Six of 13 PTCs examined harbored RET c…			253
551	JOUR	The control of anaplastic thyroid carcinoma cell lines by oncolytic poxviruses.	Mundi, Neil, Um, Sung, Yoo, John, Rizzo, Giananthony, Black, Morgan, Pinto, Nicole, Palma, David A, Fung, Kevin, MacNeil, Danielle, Mymryk, Joe S, Barrett, John W, Nichols, Anthony C	2014/09//	Cell Line, Tumor, Humans, Models, Biological, Oncolytic Virotherapy, Oncolytic Viruses, Poxviridae, Thyroid Carcinoma, Anaplastic, Thyroid Neoplasms, Virus Replication, genetics, methods, physiology, therapy, virology	Virus research	190	eng		53	59	10.1016/j.virusres.2014.07.009	BACKGROUND AND SIGNIFICANCE: Anaplastic thyroid cancer (ATC) is rare, but its clinical presentation is often dramatic and aggressive and is nearly uniformly fatal. Oncolytic viral therapy is a potential strategy to improve outcomes for patients suffering with this disease. METHODS: Seven established ATC cell lines were infected with a panel of poxviruses to identify which virus had the most poten…			254
285	JOUR	Fine needle aspiration of secondary synovial sarcoma of the thyroid gland.	Murro, Diana, Slade, Jamie Macagba, Syed, Sahr, Gattuso, Paolo	2015/11//	Adult, Biomarkers, Tumor, Biopsy, Fine-Needle, Carcinoma, Medullary, Carcinoma, Neuroendocrine, Humans, In Situ Hybridization, Fluorescence, Male, Sarcoma, Synovial, Thyroid Gland, Thyroid Neoplasms, Thyroid Nodule, analysis, diagnosis, methods, pathology, secondary	Diagnostic cytopathology	43	eng	11	928	932	10.1002/dc.23327	Synovial sarcomas (SS) of the head and neck region are extremely rare and arise in only 5% of cases. We present a case of secondary SS of the thyroid originally diagnosed as medullary carcinoma on fine needle aspiration (FNA). A 41-year-old man presented with several weeks of dysphonia and a left thyroid mass. FNA of the thyroid nodule showed a cellular smear composed of loosely cohesive oval to …			255
498	JOUR	Intravenous perchlorate test in the diagnosis of Hashimoto's disease.	Gray, H W, Greig, W R, Thomson, J A, McLennan, I	1974/03//	Autoantibodies, Biopsy, Needle, Diagnosis, Differential, Fluorescent Antibody Technique, Goiter, Humans, Injections, Intravenous, Iodine, Iodine Radioisotopes, Perchlorates, Thyroid Function Tests, Thyroid Gland, Thyroiditis, Autoimmune, administration & dosage, diagnosis, immunology, isolation & purification, metabolism, pathology	Lancet (London, England)	1	eng	7853	335	337	10.1016/s0140-6736(74)93078-5				256
320	JOUR	Mammary Analog Secretory Carcinoma of the Nasal Cavity: Characterization of 2 Cases and Their Distinction From Other Low-grade Sinonasal Adenocarcinomas.	Baneckova, Martina, Agaimy, Abbas, Andreasen, Simon, Vanecek, Tomas, Steiner, Petr, Slouka, David, Svoboda, Tomas, Miesbauerova, Marketa, Michal, Michael Jr, SkÃ¡lovÃ¡, Alena	2018/06//	Adenocarcinoma, Aged, Biomarkers, Tumor, Biopsy, Diagnosis, Differential, Female, High-Throughput Nucleotide Sequencing, Humans, Immunohistochemistry, In Situ Hybridization, Fluorescence, Mammary Analogue Secretory Carcinoma, Middle Aged, Nasal Cavity, Neoplasm Grading, Nose Neoplasms, Oncogene Proteins, Fusion, Predictive Value of Tests, Registries, Reverse Transcriptase Polymerase Chain Reactio…	The American journal of surgical pathology	42	eng	6	735	743	10.1097/PAS.0000000000001048	Secretory carcinoma, originally described as mammary analog secretory carcinoma (MASC), is a low-grade salivary gland tumor characterized by a t(12;15)(p13;q25) translocation, resulting in an ETV6-NTRK3 gene fusion. Most MASCs are localized to the parotid gland and intraoral minor salivary glands. Moreover, ETV6-rearranged carcinomas with secretory features have been reported recently in the thyr…			257
532	JOUR	Evaluation of Matrix Metalloproteinase Inhibition by Peptide Microarray-Based Fluorescence Assay on Polymer Brush Substrate and in Vivo Assessment.	Lei, Zhen, Chen, Hongda, Zhang, Hua, Wang, Yaoqi, Meng, Xianying, Wang, Zhenxin	2017/12//	Animals, Cell Line, Tumor, Fluorescent Dyes, Humans, Matrix Metalloproteinase 2, Matrix Metalloproteinase 9, Mice, Peptides, Polymers, Protein Array Analysis	ACS applied materials & interfaces	9	eng	50	44241	44250	10.1021/acsami.7b15445	Matrix metalloproteinases (MMPs) are important biomarkers and potential therapeutic targets of tumor. In this report, a peptide microarray-based fluorescence assay is developed for MMPs inhibitors evaluation through immobilization of biotin-modified peptides on the poly(glycidyl methacrylate-co-2-hydroxyethyl methacrylate) (P(GMA-HEMA)) brush-modified glass slides. After biotin is recognized with…			258
437	JOUR	Structural and functional impairment of adrenergic input to intraocular cerebellar grafts during thyroid hormone deficiency.	Granholm, A C, Hall, M, Palmer, M R, Seiger, A	1984///	Adrenergic Fibers, Animals, Anterior Chamber, Cerebellum, Electrophysiology, Male, Rats, Rats, Inbred Strains, Sympathetic Nervous System, Thyroid Hormones, Thyroidectomy, anatomy & histology, deficiency, growth & development, physiology, physiopathology, transplantation	Central nervous system trauma : journal of the American Paralysis Association	1	eng	2	105	115	10.1089/cns.1984.1.105	Embryonic cerebellae were transplanted to the anterior eye chamber of normal and thyroidectomized adult rats and were left in the eye to mature for 5 weeks. The cerebellar grafts received adrenergic innervation from the sympathetic ground plexus of the host iris. The density of adrenergic fibers innervating the grafts was reduced by approximately 50% in all thyroidectomized groups, without any ef…			259
580	JOUR	A mouse mammary tumor virus env-like exogenous sequence is strictly related to progression of human sporadic breast carcinoma.	Mazzanti, Chiara Maria, Al Hamad, Mohammad, Fanelli, Giovanni, Scatena, Cristian, Zammarchi, Francesca, Zavaglia, Katia, Lessi, Francesca, Pistello, Mauro, Naccarato, Antonio Giuseppe, Bevilacqua, Generoso	2011/10//	Base Sequence, Breast Neoplasms, Carcinoma, Intraductal, Noninfiltrating, Disease Progression, Epithelial Cells, Female, Genes, env, Humans, In Situ Hybridization, Lasers, Mammary Tumor Virus, Mouse, Microdissection, Real-Time Polymerase Chain Reaction, Sequence Analysis, DNA, Viral Load, genetics, pathology, virology	The American journal of pathology	179	eng	4	2083	2090	10.1016/j.ajpath.2011.06.046	A viral etiology of human breast cancer (HBC) has been postulated for decades since the identification of mouse mammary tumor virus (MMTV). The detection of MMTV env-like exogenous sequences (MMTVels) in 30% to 40% of invasive HBCs increased attention to this hypothesis. Looking for MMTVels during cancer progression may contribute to a better understanding of their role in HBC. Herein, we analyze…			260
269	JOUR	Changes in integrin and E-cadherin expression in neoplastic versus normal thyroid tissue.	Serini, G, Trusolino, L, Saggiorato, E, Cremona, O, De Rossi, M, Angeli, A, Orlandi, F, Marchisio, P C	1996/04//	Adenocarcinoma, Follicular, Adenoma, Adult, Aged, Antibodies, Monoclonal, Biopsy, Needle, Blotting, Western, Cadherins, Carcinoma, Papillary, Disease Progression, Female, Fluorescent Antibody Technique, Indirect, Humans, Immunoenzyme Techniques, Integrins, Male, Middle Aged, Neoplasm Staging, Protein-Tyrosine Kinases, Reference Values, Thyroid Gland, Thyroid Neoplasms, analysis, biosynthesis, cyt…	Journal of the National Cancer Institute	88	eng	7	442	449	10.1093/jnci/88.7.442	BACK: The functional organization of polarized epithelia depends mostly on adhesion molecules belonging to the integrin and cadherin families. These molecules either recognize basement membrane components, such as laminins, or form intercellular junctions via homotypic interactions. Such tissue organization is often disrupted upon neoplastic transformation, and the resulting loss of functional po…			261
493	JOUR	The diagnostic significance of the parietal cell immunofluorescent test.	Bernhardt, H, Burkett, L L, Fields, M L, Killian, J	1965/10//	Anemia, Macrocytic, Anemia, Pernicious, Arthritis, Rheumatoid, Autoantibodies, Diabetes Mellitus, Fluorescent Antibody Technique, Gastrectomy, Gastric Mucosa, Gastritis, Humans, Thyroid Diseases, Whipple Disease, diagnosis	Annals of internal medicine	63	eng	4	635	641	10.7326/0003-4819-63-4-635				262
395	JOUR	The N-acetylglucosamine-specific receptor of the thyroid: purification, further characterization, and expression patterns on normal and pathological glands.	Thibault, V, Blanck, O, Courageot, J, Pachetti, C, Perrin, C, de Mascarel, A, Miquelis, R	1993/01//	Animals, Blotting, Western, Fluorescent Antibody Technique, Humans, Hydrogen-Ion Concentration, Isoelectric Focusing, Isoelectric Point, Molecular Weight, Receptors, Immunologic, Receptors, N-Acetylglucosamine, Receptors, Thyroid Hormone, Swine, Thyroid Diseases, Thyroid Gland, Thyroid Neoplasms, Tissue Distribution, chemistry, isolation & purification, metabolism	Endocrinology	132	eng	1	468	476	10.1210/endo.132.1.8419143	The N-acetylglucosamine receptor of the thyroid has been putatively described as both a prohormonal receptor that could play a role in the intrafollicular retention of immature thyroglobulin and a vectorial conveyor of these immature molecules to the iodination site. To further characterize this receptor, we have developed a purification procedure yielding nanomolar amounts of N-acetylglucosamine…			263
416	JOUR	Autoantibodies to prolactin-secreting cells of human pituitary.	Bottazzo, G F, Pouplard, A, Florin-Christensen, A, Doniach, D	1975/07//	Adolescent, Adrenal Cortex, Adult, Aged, Autoantibodies, Autoimmune Diseases, Breast Neoplasms, Child, Endocrine System Diseases, Female, Fluorescent Antibody Technique, Humans, Hypophysectomy, Islets of Langerhans, Leydig Cells, Male, Middle Aged, Organ Specificity, Parathyroid Glands, Pituitary Gland, Prolactin, Staining and Labeling, Stomach, Thyroid Gland, immunology, isolation & purification…	Lancet (London, England)	2	eng	7925	97	101	10.1016/s0140-6736(75)90004-5	A new autoantibody which reacted with anterior-pituitary tissue was deteected by immunofluorescent staining. Of 287 patients having one or more autoimmune endocrine diseases, sera from 19 reacted with pituitary glands obtained at hypophysectomy for breast cancer. Using specific rabbit antibodies to each of the six pituitary hormones and rhodamine-labelled goat-anti-rabbit-immunoglobulin (Ig) foll…			264
729	JOUR	Engineering the Photoluminescence of CsPbX(3) (X = Cl, Br, and I) Perovskite Nanocrystals Across the Full Visible Spectra with the Interval of 1 nm.	Liu, Huiwen, Liu, Zhaoyu, Xu, Wenzhe, Yang, Liting, Liu, Yi, Yao, Dong, Zhang, Daqi, Zhang, Hao, Yang, Bai	2019/04//		ACS applied materials & interfaces	11	eng	15	14256	14265	10.1021/acsami.9b01930	Fluorescent CsPbX(3) (X = Cl, Br, I) perovskite nanocrystals (NCs) are compelling candidates for illumination and display applications because of the high photoluminescence quantum yields (PLQYs) narrow PL emission spectra, and in particular, the potential to tune the emission spectra in the entire visible range. However, limited by the current preparation strategy, the successive adjustment of P…			265
206	JOUR	An ex vivo culture system to study thyroid development.	Delmarcelle, Anne-Sophie, Villacorte, Mylah, Hick, Anne-Christine, Pierreux, Christophe E	2014/06//	Animals, Dissection, Embryo, Mammalian, Female, Fluorescent Antibody Technique, Mice, Mice, Knockout, Mice, Transgenic, Pregnancy, Thyroid Gland, Tissue Culture Techniques, embryology, methods, surgery	Journal of visualized experiments : JoVE		eng	88			10.3791/51641	The thyroid is a bilobated endocrine gland localized at the base of the neck, producing the thyroid hormones T3, T4, and calcitonin. T3 and T4 are produced by differentiated thyrocytes, organized in closed spheres called follicles, while calcitonin is synthesized by C-cells, interspersed in between the follicles and a dense network of blood capillaries. Although adult thyroid architecture and fun…			266
181	JOUR	Inverse expression of caveolin-1 and EGFR in thyroid cancer patients.	JankoviÄ, Jelena, TatiÄ, Svetislav, BoÅ¾iÄ, Vesna, Å½ivaljeviÄ, Vladan, CvejiÄ, Dubravka, PaskaÅ¡, Svetlana	2017/03//	Biomarkers, Tumor, Biopsy, Fine-Needle, Caveolin 1, DNA Mutational Analysis, ErbB Receptors, Fluorescent Antibody Technique, Gene Expression Regulation, Neoplastic, Genetic Predisposition to Disease, Humans, Mutation, Neoplasm Staging, Phenotype, Predictive Value of Tests, Proto-Oncogene Proteins B-raf, Reverse Transcriptase Polymerase Chain Reaction, Thyroid Neoplasms, analysis, chemistry, genet…	Human pathology	61	eng		164	172	10.1016/j.humpath.2016.10.020	Cytological analysis of fine-needle aspiration (FNA) is the first step in evaluation of patients with nodular thyroid disease with the primary goal to exclude thyroid malignancy. Its improvement by combining cytology with molecular markers is still a matter of investigation. In this study, 2 molecular markers were used: caveolin-1 and epidermal growth factor receptor (EGFR), along with the well-e…			267
62	JOUR	Expression of thyroglobulin by regulatory T cells in thyroid tissue.	Zhu, Yun-Qing, Hu, Yun, He, Ke, Li, Na, Jiang, Peng, Pan, Yu-Qin, Zhou, Hong, Mao, Xiao-Ming	2019/11//	Adult, Aged, Animals, Flow Cytometry, Fluorescent Antibody Technique, Gene Expression, Gene Expression Profiling, Humans, Immunomodulation, Male, Middle Aged, T-Lymphocytes, Regulatory, Thyroglobulin, Thyroid Function Tests, Thyroid Gland, Thyroid Nodule, Young Adult, diagnostic imaging, genetics, immunology, metabolism, pathology	Journal of molecular endocrinology	63	eng	4	261	271	10.1530/JME-19-0110	The follicles are the minimal functional unit of the thyroid; the morphology and the function of each follicle can vary significantly. However, the reasons for the apparent follicular heterogeneity are poorly understood. Some tissue-resident regulatory T cells (Tregs) have a special phenotype that expresses unique molecules related to local tissue and regulates the tissue functions. The aim of th…			268
305	JOUR	Is thyroid follicular cancer in Japanese caused by a specific t(2; 3)(q13; p25) translocation generating Pax8-PPAR gamma fusion mRNA?	Hibi, Yatsuka, Nagaya, Takashi, Kambe, Fukushi, Imai, Tsuneo, Funahashi, Hiroomi, Nakao, Akimasa, Seo, Hisao	2004/06//	Adenocarcinoma, Follicular, Alternative Splicing, Blotting, Northern, DNA-Binding Proteins, Exons, Humans, In Situ Hybridization, Fluorescence, Japan, Nuclear Proteins, Oncogene Proteins, Fusion, PAX8 Transcription Factor, PPAR gamma, Paired Box Transcription Factors, RNA, Messenger, Reverse Transcriptase Polymerase Chain Reaction, Thyroid Neoplasms, Trans-Activators, Translocation, Genetic, gene…	Endocrine journal	51	eng	3	361	366	10.1507/endocrj.51.361	A recent western study reports that t(2; 3)(q13; p25) translocation resulting in the expression of the Pax8-PPAR gamma fusion gene in patients with thyroid follicular carcinoma (FTC) occurs with high incidence (63%). Furthermore, the products of the fusion gene were shown to suppress the function of PPAR gamma in a predominantly negative manner, conferring them with an oncogenic potential. We exa…			269
338	JOUR	Retrovirus-mediated gene transfer into canine thyroid using an ex vivo strategy.	O'Malley, B W Jr, Adams, R M, Sikes, M L, Sawada, T, Ledley, F D	1993/04//	Animals, Base Sequence, Cells, Cultured, DNA, Dogs, Drug Resistance, Microbial, Molecular Sequence Data, Neomycin, Retroviridae, Thyroid Gland, Transfection, beta-Galactosidase, cytology, genetics, pharmacology, transplantation	Human gene therapy	4	eng	2	171	178	10.1089/hum.1993.4.2-171	We describe studies in a canine model aimed at establishing methods for ex vivo gene delivery to thyroid follicular cells. Canine follicular cells were harvested from tissue obtained by unilateral lobectomy, grown in thyrotropin-containing media, and transduced with amphotropic retroviral vectors carrying Escherichia coli beta-galactosidase or Tn7 neomycin-resistance genes. Up to 30% of cells wer…			270
390	JOUR	Hyalinizing trabecular adenoma of the thyroid gland: recognition and characterization of its cytoplasmic yellow body.	Rothenberg, H J, Goellner, J R, Carney, J A	1999/01//	Adenoma, Adult, Biopsy, Needle, Coloring Agents, Female, Humans, Hyalin, Immunoenzyme Techniques, Inclusion Bodies, Lipofuscin, Organelles, Staining and Labeling, Thyroid Neoplasms, metabolism, pathology, ultrastructure	The American journal of surgical pathology	23	eng	1	118	125	10.1097/00000478-199901000-00014	Many round, pale yellow, cytoplasmic inclusion bodies were found in hematoxylin and eosin-stained sections of a hyalinizing trabecular adenoma of the thyroid. The bodies were refractile and frequently had a microvacuolated or granular substructure. They were usually located close to the nucleus, often indented it, and rarely occurred within it. Histochemically, they showed a glycosaminoglycan, pr…			271
720	JOUR	Lymphocyte transfusions prevent diabetes in the Bio-Breeding/Worcester rat.	Rossini, A A, Faustman, D, Woda, B A, Like, A A, Szymanski, I, Mordes, J P	1984/07//	Animals, Autoantibodies, Blood Transfusion, Concanavalin A, Diabetes Mellitus, Experimental, Diabetes Mellitus, Type 1, Immunity, Innate, Lymphocyte Activation, Rats, Rats, Inbred Strains, T-Lymphocytes, analysis, immunology, prevention & control, transplantation	The Journal of clinical investigation	74	eng	1	39	46	10.1172/JCI111416	The Bio-Breeding/Worcester (BB/W) rat develops spontaneous autoimmune diabetes similar to human insulin-dependent diabetes mellitus. Transfusions of whole blood from the nondiabetic W-line of BB/W rats prevent the syndrome in diabetes-prone recipients. We report three experiments designed to determine which blood component is protective. In all experiments, diabetes-prone BB/W rats 23 to 35 d of …			272
594	JOUR	Clinical utility of TERT promoter mutations and ALK rearrangement in thyroid cancer patients with a high prevalence of the BRAF V600E mutation.	Bae, Ja Seong, Kim, Yourha, Jeon, Sora, Kim, Se Hee, Kim, Tae Jung, Lee, Sohee, Kim, Min-Hee, Lim, Dong Jun, Lee, Youn Soo, Jung, Chan Kwon	2016/02//	Adenocarcinoma, Follicular, Adult, Aged, Anaplastic Lymphoma Kinase, Asian Continental Ancestry Group, Biomarkers, Tumor, Carcinoma, Carcinoma, Medullary, Carcinoma, Papillary, Cell Differentiation, DNA Mutational Analysis, Decision Support Techniques, Female, Gene Frequency, Gene Rearrangement, Genetic Predisposition to Disease, Humans, Immunohistochemistry, In Situ Hybridization, Fluorescence, …	Diagnostic pathology	11	eng		21	21	10.1186/s13000-016-0458-6	BACKGROUND: Mutations in the TERT promoter, ALK rearrangement, and the BRAF V600E mutation are associated with aggressive clinicopathologic features in thyroid cancers. However, little is known about the impact of TERT promoter mutations and ALK rearrangement in thyroid cancer patients with a high prevalence of BRAF mutations. METHODS: We performed Sanger sequencing to detect BRAF V600E and TERT …			273
284	JOUR	Oncolytic vaccinia virotherapy of anaplastic thyroid cancer in vivo.	Lin, Shu-Fu, Price, Daniel L, Chen, Chun-Hao, Brader, Peter, Li, Sen, Gonzalez, Lorena, Zhang, Qian, Yu, Yong A, Chen, Nanhai, Szalay, Aladar A, Fong, Yuman, Wong, Richard J	2008/11//	Animals, Cancer Vaccines, Carcinoma, Cell Division, Cell Line, Tumor, Genetic Markers, Humans, Mice, Mice, Nude, Neoplasm Transplantation, Thyroid Neoplasms, Transplantation, Heterologous, Vaccinia virus, Viral Plaque Assay, Viral Vaccines, drug effects, immunology, pathology, therapeutic use	The Journal of clinical endocrinology and metabolism	93	eng	11	4403	4407	10.1210/jc.2008-0316	CONTEXT: Anaplastic thyroid carcinoma (ATC) is a fatal disease with a median survival of only 6 months. Novel therapies are needed to improve dismal outcomes. OBJECTIVE: A mutated, replication-competent, vaccinia virus (GLV-1h68) has oncolytic effects on human ATC cell lines in vitro. We assessed the utility of GLV-1h68 in treating anaplastic thyroid cancer in vivo. DESIGN: Athymic nude mice with…			274
685	JOUR	Multicolour FISH detection of radioactive iodine-induced 17cen-p53 chromosomal breakage in buccal cells from therapeutically exposed patients.	RamÃ­rez, M J, Puerto, S, GalofrÃ©, P, Parry, E M, Parry, J M, Creus, A, Marcos, R, SurrallÃ©s, J	2000/08//	Adult, Aged, Alleles, Centromere, Chromosome Aberrations, Chromosome Breakage, Chromosomes, Human, Pair 17, Female, Gene Deletion, Genes, p53, Humans, Hyperthyroidism, In Situ Hybridization, Fluorescence, Iodine Radioisotopes, Male, Middle Aged, Mouth Mucosa, Thyroid Neoplasms, adverse effects, cytology, methods, radiation effects, radiotherapy, therapeutic use, ultrastructure	Carcinogenesis	21	eng	8	1581	1586		Simultaneous labelling of 17cen and the p53 locus by multicolour FISH was used to monitor radioactive iodine-induced structural and numerical chromosome abnormalities in buccal cells from 29 hyperthyroidism and thyroid cancer patients sampled before and after therapeutic treatment. This novel methodology allowed the efficient detection of 17p deletions leading to p53 allelic deletions, 17p gains …			275
65	JOUR	Adamantinoma-like Ewing family tumors of the head and neck: a pitfall in the differential diagnosis of basaloid and myoepithelial carcinomas.	Bishop, Justin A, Alaggio, Rita, Zhang, Lei, Seethala, Raja R, Antonescu, Cristina R	2015/09//	12E7 Antigen, Adamantinoma, Adolescent, Adult, Antigens, CD, Biomarkers, Tumor, Biopsy, Bone Neoplasms, Calmodulin-Binding Proteins, Cell Adhesion Molecules, Cell Differentiation, Child, Diagnosis, Differential, Female, Gene Rearrangement, Head and Neck Neoplasms, Humans, Immunohistochemistry, In Situ Hybridization, Fluorescence, Keratins, Male, Middle Aged, Myoepithelioma, Neuroectodermal Tumors…	The American journal of surgical pathology	39	eng	9	1267	1274	10.1097/PAS.0000000000000460	Ewing sarcoma family tumors (EFTs) of the head and neck are rare and may be difficult to diagnose, as they display significant histologic overlap with other more common undifferentiated small blue round cell malignancies. Occasionally, EFTs may exhibit overt epithelial differentiation in the form of diffuse cytokeratin immunoexpression or squamous pearls, resembling the so-called adamantinoma-lik…			276
538	JOUR	Lymphoepithelioma-like carcinoma of the urinary bladder: clinicopathologic, immunohistochemical, and molecular features.	Williamson, Sean R, Zhang, Shaobo, Lopez-Beltran, Antonio, Shah, Rajal B, Montironi, Rodolfo, Tan, Puay-Hoon, Wang, Mingsheng, Baldridge, Lee Ann, MacLennan, Gregory T, Cheng, Liang	2011/04//	Aged, Aged, 80 and over, Biomarkers, Tumor, Carcinoma, Carcinoma in Situ, Chemotherapy, Adjuvant, Cystectomy, DNA, Neoplasm, Female, Humans, Immunohistochemistry, In Situ Hybridization, In Situ Hybridization, Fluorescence, Male, Middle Aged, Retrospective Studies, Treatment Outcome, Urinary Bladder Neoplasms, analysis, genetics, metabolism, pathology, secondary	The American journal of surgical pathology	35	eng	4	474	483	10.1097/PAS.0b013e31820f709e	INTRODUCTION: Lymphoepithelioma-like carcinoma (LELC) in the urinary tract is a rare malignancy, named for its resemblance to nasopharyngeal undifferentiated carcinoma or lymphoepithelioma. Investigation of immunohistochemical and molecular characteristics of bladder LELC is limited. The pathogenesis and biological behavior of these tumors are controversial. MATERIALS AND METHODS: We examined cli…			277
359	JOUR	Immune regulatory plasmacytoid dendritic cells selectively accumulate in perithyroidal lymph nodes of patients with Graves disease: implications for the understanding of autoimmunity.	Hassan, I, Brendel, C, Zielke, A, Burchert, A, Danila, R	2013///	Autoimmunity, Dendritic Cells, Graves Disease, Graves Ophthalmopathy, Humans, Lymph Nodes, Sampling Studies, Thyroid Gland, Thyroidectomy, immunology, pathology, surgery	Revista medico-chirurgicala a Societatii de Medici si Naturalisti din Iasi	117	eng	1	46	51		Endocrine orbitopathy (EO) is the most common extrathyroidal manifestation of Graves disease (GD) but the involvement of the underlying immunological dysregulations remains largely unknown. The major source for IFNa-production, plasmacytoid dendritic cells (PDC) are fundamentally involved in the integration of TH1 and TH2 immune responses but also implicated in the pathogenesis of autoimmune dise…			278
525	JOUR	Smart Sorting of Tumor Phenotype with Versatile Fluorescent Ag Nanoclusters by Sensing Specific Reactive Oxygen Species.	Chen, Xin, Wang, Tiegong, Le, Wenjun, Huang, Xin, Gao, Minghui, Chen, Qian, Xu, Shuogui, Yin, Detao, Fu, Qingge, Shao, Chengwei, Chen, Bingdi, Shi, Donglu	2020///	Animals, Biosensing Techniques, Cell Line, Tumor, Fluorescent Dyes, Humans, Metal Nanoparticles, Mice, Neoplasms, Phenotype, Reactive Oxygen Species, Sensitivity and Specificity, Serum Albumin, Bovine, Silver, Spectrometry, Fluorescence, diagnosis, metabolism, pathology	Theranostics	10	eng	8	3430	3450	10.7150/thno.38422	Reactive oxygen species (ROS) play a crucial role in cancer formation and development, especially cancer metastasis. However, lack of a precise tool, which could accurately distinguish specific types of ROS, restricts an in-depth study of ROS in cancer development and progression. Herein, we designed smart and versatile fluorescent Ag nanoclusters (AgNCs) for sensitive and selective detection of …			279
626	JOUR	Galectin-3 Targeting in Thyroid Orthotopic Tumors Opens New Ways to Characterize Thyroid Cancer.	De Rose, Francesco, Braeuer, Miriam, Braesch-Andersen, Sten, Otto, Angela M, Steiger, Katja, Reder, Sybille, Mall, Sabine, Nekolla, Stephan, Schwaiger, Markus, Weber, Wolfgang A, Bartolazzi, Armando, D'Alessandria, Calogero	2019/06//	Animals, Cell Line, Tumor, Cell Proliferation, Cell Transformation, Neoplastic, Female, Galectin 3, Gene Expression Regulation, Neoplastic, Humans, Immunoconjugates, Iodine Radioisotopes, Mice, Positron Emission Tomography Computed Tomography, Radioactive Tracers, Spheroids, Cellular, Symporters, Thyroid Neoplasms, diagnostic imaging, immunology, metabolism, pathology	Journal of nuclear medicine : official publication, Society of Nuclear Medicine	60	eng	6	770	776	10.2967/jnumed.118.219105	Preoperative characterization of thyroid nodules is challenging since thyroid scintigraphy fails to distinguish between benign and malignant lesions. Galectin-3 (gal-3) is expressed in well-differentiated and in undifferentiated thyroid cancer types but not in normal thyrocytes and benign thyroid lesions. Herein, we aimed to validate gal-3 targeting as a specific method to detect non-radioiodine-…			280
670	JOUR	Prognostic utility of fluorescence in situ hybridization for determining HER2 gene amplification in breast cancer.	Kammori, Makoto, Kurabayashi, Rie, Kashio, Mitsuhiko, Sakamoto, Akiko, Yoshimoto, Masataka, Amano, Sadao, Kaminishi, Michio, Yamada, Tetsu, Takubo, Kaiyo	2008/03//	Adult, Aged, Aged, 80 and over, Breast Neoplasms, Female, Gene Amplification, Genes, erbB-2, Humans, Immunohistochemistry, In Situ Hybridization, Fluorescence, Middle Aged, Prognosis, Receptor, ErbB-2, Receptors, Estrogen, Receptors, Progesterone, diagnosis, metabolism, pathology	Oncology reports	19	eng	3	651	656		An accurate investigation of the HER2 proto-oncogene is extremely important for the therapy and prognostication of breast cancer. Currently, immunohistochemistry (IHC) and fluorescence in situ hybridization (FISH) are standard methods for this purpose. The aim of this study was to detect the expression and amplification of HER2 in paraffin-embedded samples of breast cancer tissue and to investiga…			281
301	JOUR	Regression analysis of catecholamine utilization in discrete hypothalamic and forebrain regions of the male rat: effects of thyroidectomy.	Andersson, K, Eneroth, P	1985/01//	Animals, Body Temperature, Body Weight, Brain, Catecholamines, Corticosterone, Dopamine, Fluorescent Antibody Technique, Hypothalamus, Male, Methyltyrosines, Norepinephrine, Pituitary Hormones, Anterior, Rats, Rats, Inbred Strains, Regression Analysis, Thyroid Hormones, Thyroidectomy, alpha-Methyltyrosine, blood, metabolism, pharmacology	Acta physiologica Scandinavica	123	eng	1	105	119	10.1111/j.1748-1716.1985.tb07567.x	The effects of thyroidectomy (4 weeks) on dopamine (DA) and noradrenaline (NA) turnover rates were determined by means of regression analysis. The disappearance of catecholamine (CA) fluorescence (using quantitative histofluorimetry) after tyrosine hydroxylase inhibition (alpha-methyl-DL-p-tyrosine methyl ester) has been investigated in discrete hypothalamic and forebrain DA and NA nerve terminal…			282
610	JOUR	Activities of cytosolic aldehyde dehydrogenase isozymes in colon cancer: determination using selective, fluorimetric assays.	WroczyÅski, Piotr, Nowak, Marzena, Wierzchowski, Jacek, Szubert, Artur, PolaÅski, Jerzy	2005///	Adenocarcinoma, Aged, Aged, 80 and over, Aldehyde Dehydrogenase, Aldehyde Dehydrogenase 1 Family, Colon, Colonic Neoplasms, Cytosol, Female, Humans, Isoenzymes, Male, Middle Aged, Retinal Dehydrogenase, Spectrometry, Fluorescence, enzymology, metabolism, pathology, surgery	Acta poloniae pharmaceutica	62	eng	6	427	433		Activities of two principal cytosolic forms of human aldehyde dehydrogenase, ALDH1A1 and ALDH3AI in colon tumor homogenates and surrounding tissue fragments were measured, using isozymeselective, fluorimetric assays. The assays are based on two fluorogenic substrates, 6-methoxy-2-naphthaldehyde and 7-methoxy-l-naphthaldehyde, and are independent of NADH determinations. The results show high varia…			283
644	JOUR	Expression of an intercellular adhesion molecule, ICAM-1, by human thyroid cells.	Weetman, A P, Cohen, S, Makgoba, M W, Borysiewicz, L K	1989/07//	Antigens, Surface, Biological Factors, Cell Adhesion, Cell Adhesion Molecules, Cells, Cultured, Cytokines, Fluorescent Antibody Technique, Graves Disease, Humans, Membrane Glycoproteins, Thyroid Gland, Thyroiditis, Autoimmune, analysis, immunology	The Journal of endocrinology	122	eng	1	185	191	10.1677/joe.0.1220185	Intercellular adhesion molecule-1 (ICAM-1), hitherto identified on activated B cells, macrophages, dendritic cells, endothelia and certain epithelial cells, serves as a ligand for the lymphocyte function-associated antigen-1 (LFA-1). ICAM-1 binding by LFA-1 enhances the efficiency of lymphocyte-target cell and lymphocyte-accessory cell interactions. We have investigated the in-vitro expression of…			284
89	JOUR	Correlations of ultrasound and pathological features of thyroid carcinoma with TC-1 mRNA and protein expression.	Zhang, C-L, Geng, C-H, Jian, J-J, He, M, Zhao, H-W, Li, H-Y	2019/04//	Biomarkers, Tumor, Carcinogenesis, Female, Humans, Lymphatic Metastasis, Male, Middle Aged, Neoplasm Grading, Neoplasm Proteins, Neoplasm Staging, Prognosis, RNA, Messenger, Thyroid Cancer, Papillary, Thyroid Gland, Thyroid Neoplasms, Thyroidectomy, Ultrasonography, diagnosis, diagnostic imaging, genetics, metabolism, pathology, surgery	European review for medical and pharmacological sciences	23	eng	8	3440	3446	10.26355/eurrev_201904_17708	OBJECTIVE: To investigate the correlations of ultrasound and pathological characteristics of thyroid carcinoma through evaluating the messenger ribonucleic acid (mRNA) level and protein expression of thyroid cancer-1 (TC-1). PATIENTS AND METHODS: The patients with papillary thyroid carcinoma (PTC) hospitalized in our hospital were enrolled. Then, real-time fluorescence quantitative polymerase cha…			285
550	JOUR	Epithelioid Hemangioendothelioma: a Rare Primary Thyroid Tumor with Confirmation of WWTR1 and CAMTA1 Rearrangements.	Shah, Akeesha A, Ohori, N Paul, Yip, Linwah, Coyne, Christopher, Antonescu, Cristina R, Seethala, Raja R	2016/06//	Adult, Biomarkers, Tumor, Calcium-Binding Proteins, Female, Gene Rearrangement, Hemangioendothelioma, Epithelioid, Humans, Immunohistochemistry, In Situ Hybridization, Fluorescence, Intracellular Signaling Peptides and Proteins, Thyroid Neoplasms, Trans-Activators, Transcription Factors, analysis, genetics, pathology	Endocrine pathology	27	eng	2	147	152	10.1007/s12022-016-9428-5	We report a rare case of epithelioid hemangioendothelioma as a primary thyroid tumor. To our knowledge, there are only two prior unequivocal cases of primary thyroid epithelioid hemangioendothelioma reported in the English literature. This is the first case in the thyroid with molecular confirmation.			286
676	JOUR	A Pilot Study of Protein Microarray for Simultaneous Analysis of 274 Cytokines Between Abdominal Aortic Aneurysm and Normal Aorta.	Yuwen, Li, Ciqiu, Yang, Yi, Shi, Ruilei, Liu, Yuanhui, Lai, Bo, Lin, Songqi, Li, Weiming, Lv, Jie, Li	2019/10//	Aged, Aorta, Abdominal, Aortic Aneurysm, Abdominal, Biomarkers, Cytokines, Female, Humans, Inflammation Mediators, Male, Pilot Projects, Protein Array Analysis, analysis, metabolism, methods, pathology	Angiology	70	eng	9	830	837	10.1177/0003319719844678	Cytokines play an important role in the pathogenesis of abdominal aortic aneurysm (AAA). We evaluated the cytokine expression profile of large AAA walls using a 274-cytokine protein array. We hypothesized that AAAs are characterized by an inflammatory, chemotactic cytokine profile. We investigated the cytokine expression profile of 12 patients with AAA and 6 nonaneurysmal controls using an antibo…			287
351	JOUR	IgG4-positive extranodal marginal zone lymphoma arising in Hashimoto's thyroiditis: clinicopathological and cytogenetic features of a hitherto undescribed condition.	Tan, Char-Loo, Ong, Yew-Kwang, Tan, Soo-Yong, Ng, Siok-Bian	2016/05//	Biopsy, Fine-Needle, Cytogenetic Analysis, Hashimoto Disease, Humans, Immunoglobulin G, Immunoglobulin Heavy Chains, Immunohistochemistry, In Situ Hybridization, Fluorescence, Lymphoma, B-Cell, Marginal Zone, Male, Middle Aged, Translocation, Genetic, complications, genetics, immunology, pathology	Histopathology	68	eng	6	931	937	10.1111/his.12854	AIMS: Hashimoto's thyroiditis was recently divided into IgG4-plasma cell-rich and IgG4-plasma cell-poor subtypes. The former, also known as IgG4 thyroiditis, is associated with clinical, serological, sonographic and morphological features that are distinctive from those of the non-IgG4 subgroup. We describe an interesting case of IgG4-positive mucosa-associated lymphoid tissue (MALT) lymphoma ari…			288
192	JOUR	A single nucleotide polymorphism associated with isolated cleft lip and palate, thyroid cancer and hypothyroidism alters the activity of an oral epithelium and thyroid enhancer near FOXE1.	Lidral, Andrew C, Liu, Huan, Bullard, Steven A, Bonde, Greg, Machida, Junichiro, Visel, Axel, Uribe, Lina M Moreno, Li, Xiao, Amendt, Brad, Cornell, Robert A	2015/07//	Alleles, Animals, Cell Line, Cleft Lip, Cleft Palate, Cloning, Molecular, Epithelial Cells, Epithelium, Forkhead Transcription Factors, Gene Expression Regulation, Developmental, Genetic Loci, Green Fluorescent Proteins, Humans, Hypothyroidism, Mice, Mice, Transgenic, Palate, Polymorphism, Single Nucleotide, Promoter Regions, Genetic, Thyroid Gland, Thyroid Neoplasms, Zebrafish, cytology, embryol…	Human molecular genetics	24	eng	14	3895	3907	10.1093/hmg/ddv047	Three common diseases, isolated cleft lip and cleft palate (CLP), hypothyroidism and thyroid cancer all map to the FOXE1 locus, but causative variants have yet to be identified. In patients with CLP, the frequency of coding mutations in FOXE1 fails to account for the risk attributable to this locus, suggesting that the common risk alleles reside in nearby regulatory elements. Using a combination …			289
509	JOUR	Study on the expression of PAK4 and P54 protein in breast cancer.	Bi, Yanqing, Tian, Mengzi, Le, Jinghong, Wang, Linlin, Liu, Xiaofang, Qu, Jianhua, Hao, Min	2016/06//	Adult, Aged, Biomarkers, Tumor, Breast Neoplasms, Chloroplast Proteins, Endoribonucleases, Female, Fibroma, Fluorescent Antibody Technique, Follow-Up Studies, Humans, Middle Aged, Neoplasm Invasiveness, Neoplasm Staging, Prognosis, metabolism, p21-Activated Kinases, pathology	World journal of surgical oncology	14	eng	1	160	160	10.1186/s12957-016-0913-6	BACKGROUND: Previous evidence have demonstrated that p21-activated kinase PAK4 was correlated with breast cancer.Â The aim of this paper is to study the expression and interaction of p21-activated kinase (pAK)-4 and P54 protein in breast cancer. METHODS: A total of 80 patients were enrolled in our study (breast fibroma nâ=â20, breast noninvasive cancer nâ=â20, early breast invasive cancer…			290
268	JOUR	Thyroid hormone responsive genes in cultured human fibroblasts.	Moeller, Lars C, Dumitrescu, Alexandra M, Walker, Robert L, Meltzer, Paul S, Refetoff, Samuel	2005/02//	Biopsy, Cells, Cultured, DNA, Complementary, Fibroblasts, Gene Expression Regulation, Humans, Kinetics, Oligonucleotide Array Sequence Analysis, RNA, RNA, Messenger, Reverse Transcriptase Polymerase Chain Reaction, Skin, Skin Physiological Phenomena, Thyroid Hormones, Triiodothyronine, cytology, drug effects, genetics, isolation & purification, pharmacology, physiology	The Journal of clinical endocrinology and metabolism	90	eng	2	936	943	10.1210/jc.2004-1768	Human skin fibroblasts are readily accessible cells for propagation in culture without transformation that can serve for direct pathophysiology studies in subjects with inherited diseases. We thus examined by quantitative fluorescent cDNA microarray analysis the effect of thyroid hormone (TH) on the expression of more than 15,000 genes in fibroblasts of two normal individuals. Fibroblasts from tw…			291
379	JOUR	Fluorescamine in cytodiagnosis of thyroid carcinomas.	Sundler, F, Uddman, R, Larsson, L I, Telenius-Berg, M, Berg, B, HÃ¥kanson, R	1978///	Biopsy, Needle, Cytodiagnosis, Diagnosis, Differential, Fluorescamine, Humans, Spiro Compounds, Thyroid Neoplasms, diagnosis, methods	Acta cytologica	22	eng	1	54	56		Fluorescamine, which reacts with primary amino groups yielding intensely fluorescent products, was found to induce intense fluorescence in cells from medullary and papillary thyroid carcinoma. No fluorescence was detected in cells from follicular or undifferentiated carcinoma or from benign thyroid lesions, except HÃ¼rthle cell adenomas, the cells of which exhibited moderate fluorescamine-induced…			292
124	JOUR	[Research progress in the Hepatobiliary Surgery operation of hepatic hilar plate system].	Dong, X F, Zhong, J T, Chen, Y Y, Liu, T Q, Yang, J R	2020/07//	Blood Loss, Surgical, Carcinoma, Hepatocellular, China, Connective Tissue, Hepatectomy, Humans, Liver, Liver Neoplasms, Portal Vein, adverse effects, anatomy & histology, blood supply, methods, prevention & control, surgery	Zhonghua wai ke za zhi [Chinese journal of surgery]	58	chi	7	555	557	10.3760/cma.j.cn112139-20191010-00503	An estimate of about 50% of new liver cancer cases worldwide occur in China every year.Surgical resection is still the major treatment choice for longer survival of patients with hepatocellular carcinoma. Blocking hepatic blood flow and reducing intraoperative bleeding ensure the success of the operation. Anatomic separation of hepatic hilar region is the precondition of hepatic inflow occlusion.…			293
279	JOUR	[Effects of Electroacupuncture on Activities of Satellite Glial Cells of Dorsal Root Ganglia in Rats with Neck Incision Pain].	Qiao, Li-Na, Tan, Lian-Hong, Yang, Jiao-Jiao, Gao, Qiao-Ling, Zhu, Jiang, Rong, Pei-Jing, Zhu, Bing, Yang, Yong-Sheng, Liu, Jun-Ling	2017/08//	Acupuncture Points, Animals, Connexin 43, Cytokines, Electroacupuncture, Ganglia, Spinal, Glial Fibrillary Acidic Protein, Male, Neuroglia, Pain, Postoperative, Rats, Rats, Sprague-Dawley, Surgical Wound, Thyroidectomy, adverse effects, metabolism, therapy	Zhen ci yan jiu = Acupuncture research	42	chi	4	283	289		OBJECTIVE: To observe the effect of electroacupuncture (EA) stimulation of "Futu"(LI 18), etc. on activities of satellite glial cells (SGCs) in the dorsal root ganglia (DRG) in rats with neck-incision pain so as to explore its mechanism underlying reduction of post-surgical pain of thyroidectomy. METHODS: Male SD rats were randomly divided into control, model, EA-Futu (LI 18), EA-Hegu (LI 4)-Neig…			294
524	JOUR	A peculiar case of the abscopal effect: radioactive iodine therapy incidentally palliating marginal zone lymphoma.	Kornas, Robert C, Shields, Sarah-Kim, Goldman, Lyle S	2015///		Case reports in oncological medicine	2015	eng		281729	281729	10.1155/2015/281729	The abscopal effect is an extremely rare phenomenon occurring when irradiation or treatment of a primary tumor burden not only results in debulking of the targeted site but also reduces tumor size at distant sites from the intended treatment area. We present the abscopal effect occurring in a patient with low-grade marginal zone lymphoma who subsequently received radioactive iodine therapy for pa…			295
597	JOUR	Identification and comparative analysis of differentially expressed proteins in rat striatum following 6-hydroxydopamine lesions of the nigrostriatal pathway: up-regulation of amyloid precursor-like protein 2 expression.	Shen, Yan, Yu, Yi, Guo, Hong, Tang, Zhongshu, Yu, Fu-Shin X, Zhou, Jiawei	2002/09//	Adrenergic Agents, Afferent Pathways, Amyloid beta-Protein Precursor, Animals, CHO Cells, Corpus Striatum, Cricetinae, Denervation, Electrophoresis, Gel, Two-Dimensional, Female, Fluorescent Antibody Technique, Immunohistochemistry, Nerve Tissue Proteins, Oxidopamine, RNA, Messenger, Rats, Rats, Sprague-Dawley, Reverse Transcriptase Polymerase Chain Reaction, Substantia Nigra, Up-Regulation, drug…	The European journal of neuroscience	16	eng	5	896	906	10.1046/j.1460-9568.2002.02179.x	During neurodegenerative processes, cascades of degeneration and subsequent regeneration are triggered. However, the molecular nature of the factors involved in the neurodegeneration of the CNS remains largely unknown. In this study, the variations of protein expression in the striatum of adult Sprague-Dawley rats following 6-hydroxydopamine lesions were investigated, in order to better understan…			296
242	JOUR	Assessing RET/PTC in thyroid nodule fine-needle aspirates: the FISH point of view.	Caria, Paola, Dettori, Tinuccia, Frau, Daniela V, Borghero, Angela, Cappai, Antonello, Riola, Alessia, Lai, Maria L, Boi, Francesco, CalÃ², Piergiorgio, Nicolosi, Angelo, Mariotti, Stefano, Vanni, Roberta	2013/08//	Biopsy, Fine-Needle, Carcinoma, Carcinoma, Papillary, Gene Rearrangement, Humans, In Situ Hybridization, Fluorescence, Proto-Oncogene Proteins B-raf, Proto-Oncogene Proteins c-ret, Thyroid Cancer, Papillary, Thyroid Neoplasms, Thyroid Nodule, genetics	Endocrine-related cancer	20	eng	4	527	536	10.1530/ERC-13-0157	RET/PTC rearrangement and BRAF(V600E) mutation are the two prevalent molecular alterations associated with papillary thyroid carcinoma (PTC), and their identification is increasingly being used as an adjunct to cytology in diagnosing PTC. However, there are caveats associated with the use of the molecular approach in fine-needle aspiration (FNA), particularly for RET/PTC, that should be taken int…			297
543	JOUR	In vivo detection of human TRPV6-rich tumors with anti-cancer peptides derived from soricidin.	Bowen, Chris V, DeBay, Drew, Ewart, H Stephen, Gallant, Pamela, Gormley, Sean, Ilenchuk, T Toney, Iqbal, Umar, Lutes, Tyler, Martina, Marzia, Mealing, Geoffrey, Merkley, Nadine, Sperker, Sandra, Moreno, Maria J, Rice, Christopher, Syvitski, Raymond T, Stewart, John M	2013///	Animals, Cell Line, Tumor, Female, Fluorescent Dyes, Gene Expression, HEK293 Cells, Humans, Magnetic Resonance Imaging, Male, Mice, Molecular Conformation, Molecular Imaging, Neoplasms, Nuclear Magnetic Resonance, Biomolecular, Optical Imaging, Peptides, TRPV Cation Channels, Transplantation, Heterologous, antagonists & inhibitors, chemistry, diagnosis, genetics, metabolism	PloS one	8	eng	3	e58866	e58866	10.1371/journal.pone.0058866	Soricidin is a 54-amino acid peptide found in the paralytic venom of the northern short-tailed shrew (Blarina brevicauda) and has been found to inhibit the transient receptor potential of vallinoid type 6 (TRPV6) calcium channels. We report that two shorter peptides, SOR-C13 and SOR-C27, derived from the C-terminus of soricidin, are high-affinity antagonists of human TRPV6 channels that are up-re…			298
349	JOUR	Familial adenomatous polyposis in a patient with unexplained mental retardation.	Heald, Brandie, Moran, Rocio, Milas, Mira, Burke, Carol, Eng, Charis	2007/12//	Adenomatous Polyposis Coli, Adult, Chromosome Deletion, Chromosomes, Human, Pair 5, Colectomy, Female, Humans, In Situ Hybridization, Fluorescence, Intellectual Disability, Microarray Analysis, complications, genetics, methods, surgery	Nature clinical practice. Neurology	3	eng	12	694	700	10.1038/ncpneuro0658	BACKGROUND: A 22-year-old woman was referred to a genomic medicine clinic for evaluation of suspected Prader-Willi syndrome (PWS) after normal DNA methylation studies on chromosome 15 were obtained. Features suggestive of PWS included mental retardation, short stature, obesity, hypotonia, and small hands and feet. The patient, however, lacked many PWS-defining behavioral features, including hyper…			299
427	JOUR	Fluorescamine-induced fluorescence in C cell tumours of the thyroid.	Sundler, F, Larsson, L I, HÃ¤kanson, R, Ljungberg, O	1974/05//	Adenoma, Amino Acids, Animals, Biopsy, Carcinoma, Cytoplasm, Dogs, Fluoresceins, Fluorescence, Formaldehyde, Humans, Microscopy, Fluorescence, Peptides, Proteins, Thyroid Neoplasms, analysis, pathology	Virchows Archiv. A, Pathological anatomy and histology	363	eng	1	17	20	10.1007/BF00432201				300
319	JOUR	[Afferent nerve connection among "Hegu" (LI4), "Neiguan" (PC6), "Futu" (LI18) and thyroid gland region: fluorescent double labelling method].	Zhang, Lu, Jiang, Jin, Jin, Zhi-gao, Liu, Jun-ling	2010/12//	Acupuncture Points, Animals, Bisbenzimidazole, Disease Models, Animal, Fluorescent Dyes, Male, Microscopy, Fluorescence, Neurons, Afferent, Propidium, Random Allocation, Rats, Rats, Wistar, Thyroid Gland, administration & dosage, chemistry, cytology	Zhen ci yan jiu = Acupuncture research	35	chi	6	438	442,447		OBJECTIVE: To observe the peripheral and central neural connection of acupoint "Hegu" (LI4), "Neiguan" (PC6), "Futu" (LI18) and the thyroid gland (TG) region with fluorescence double-labelling method. METHODS: Thirty male Wistar rats were divided into LI4-LI18 group, PC6-LI18 group, TG-LI 18 group, LI 4-TG group, and PC 6-TG group, with 6 rats in each. Fluorescence dyes Propidium Iodide (PI, 10 m…			301
453	JOUR	DiI as a marker for cellular transplantation into solid organs.	Ledley, F D, Soriano, H E, O'Malley, B W Jr, Lewis, D, Darlington, G J, Finegold, M	1992/10//	Animals, Carbocyanines, Cell Separation, Cell Transplantation, Flow Cytometry, Fluorescent Dyes, Liver, Sheep, Staining and Labeling, Thyroid Gland, cytology, methods	BioTechniques	13	eng	4	580,582,584	587		Research in cellular transplantation is frequently compromised by an inability to identify transplanted cells engrafting into orthotopic sites if they exhibit normal morphology and no unique antigenic markers. A method is described for using the fluorescent dye DiI as a marker for cell transplantation studies. This dye is not metabolized or exchanged between cells in vitro or in vivo and enables …			302
529	JOUR	Quantitative determination of mitophagy by fluorescence microscope.	Li, Zhiyu, Wu, Qi, Li, Chenyuan, Sun, Shengrong, Wang, Zhong, Zhu, Shan	2021///		Methods in cell biology	164	eng		113	118	10.1016/bs.mcb.2020.12.006	Mitophagy is an evolutionally conserved cellular process that eliminates dysfunctional and excess mitochondria, thereby facilitating mitochondrial quality control and metabolic recycling. In addition, mitophagy is essential for cellular homeostasis and tissue development, and mitophagic dysfunction is related to various pathologies including neurodegenerative diseases and cancer. Thus, accurate q…			303
235	JOUR	The clinical porphyrias.	Taddeini, L, Watson, C J	1968/10//	Adult, Bone Marrow Examination, Bone and Bones, Carcinoma, Hepatocellular, Chromium Isotopes, Erythropoiesis, Feces, Female, Fluorescence, Fluorometry, Hexachlorocyclohexane, Humans, Hypercholesterolemia, Levulinic Acids, Liver Diseases, Liver Neoplasms, Male, Photosensitivity Disorders, Porphyrias, Porphyrins, Radiation-Protective Agents, Skin Manifestations, Spectrophotometry, Splenectomy, Sunl…	Seminars in hematology	5	eng	4	335	369					304
497	JOUR	Pathology of the cold nodule.	Brown, C L	1981/07//	Adenocarcinoma, Adenoma, Biopsy, Needle, Carcinoma, Carcinoma, Papillary, Cysts, Female, Fluorescence, Humans, Iodine Radioisotopes, Male, Thyroid Diseases, Thyroid Gland, Thyroid Neoplasms, diagnosis, pathology	Clinics in endocrinology and metabolism	10	eng	2	235	245	10.1016/s0300-595x(81)80019-9				305
251	JOUR	Mammary analog secretory carcinoma of thyroid: A case report.	Rupp, Aaron P, Bocklage, ThÃ¨rÃ©se J	2017/01//	Adult, Biomarkers, Tumor, Biopsy, Fine-Needle, Diagnosis, Differential, Female, Humans, In Situ Hybridization, Fluorescence, Mammary Analogue Secretory Carcinoma, Oncogene Proteins, Fusion, Thyroid Neoplasms, genetics, pathology	Diagnostic cytopathology	45	eng	1	45	50	10.1002/dc.23608	Mammary analog secretory carcinoma (MASC) is a recently described rare neoplasm that was first reported in the salivary gland with an associated ETV6-NTRK3 fusion. We present a case of MASC involving and presumably arising in the thyroid, which was originally diagnosed as papillary thyroid carcinoma on fine needle aspiration and surgical resection. The later correct diagnosis of MASC was confirme…			306
542	JOUR	Pruritus in the elderly. Pathophysiological, clinical, laboratory and therapeutic approach.	TÄranu, Tatiana, Toader, St, EÅanu, Irina, Toader, Mihaela Paula	2014///	Aged, Aging, Amines, Anti-Anxiety Agents, Antidepressive Agents, Tricyclic, Biopsy, Cyclohexanecarboxylic Acids, Diagnosis, Differential, Drug Therapy, Combination, Emollients, Fluorescent Antibody Technique, Direct, Gabapentin, Histamine Antagonists, Humans, Phototherapy, Pruritus, Quality of Life, Risk Assessment, Risk Factors, Skin, Treatment Outcome, etiology, gamma-Aminobutyric Acid, innerva…	Revista medico-chirurgicala a Societatii de Medici si Naturalisti din Iasi	118	eng	1	33	38		Generalized pruritus is a common symptom in elderly, patients, with severe impact on the quality of life. The diagnosis of senile idiopathic pruritus is made after the exclusion of a systemic disease such as chronic renal disease, hepatobilliary disease with cholestasis, thyroid dysfunctions, drug-induced hypersensitivity reactions, visceral or hematological neoplasia, and primitive dermatologica…			307
254	JOUR	Telomere length is related to alternative splice patterns of telomerase in thyroid tumors.	Wang, Yongchun, Meeker, Alan K, Kowalski, Jeanne, Tsai, Hua-Ling, Somervell, Helina, Heaphy, Christopher, Sangenario, Lauren E, Prasad, Nijaguna, Westra, William H, Zeiger, Martha A, Umbricht, Christopher B	2011/09//	Alternative Splicing, Humans, In Situ Hybridization, Fluorescence, ROC Curve, Reverse Transcriptase Polymerase Chain Reaction, Telomerase, Telomere, Telomere Homeostasis, Thyroid Neoplasms, enzymology, metabolism, pathology, physiology	The American journal of pathology	179	eng	3	1415	1424	10.1016/j.ajpath.2011.05.056	Telomere dysfunction and aberrant telomerase expression play important roles in tumorigenesis. In thyroid tumors, three possibly inhibitory splice variants of the active full-length isoform of human telomerase reverse transcriptase (hTERT) may be expressed. These variants might regulate telomerase activity and telomere length because it is the fraction of the full-length isoform, rather than the …			308
225	JOUR	Ewing sarcoma of the thyroid: report of 2 cases and review of the literature.	Chan, Jon M, Bilodeau, Elizabeth, Celin, Scott, Nikiforov, Yuri, Johnson, Jonas T	2013/11//	Aged, Biomarkers, Tumor, Biopsy, Needle, Chemotherapy, Adjuvant, Diagnosis, Differential, Female, Follow-Up Studies, Humans, Immunohistochemistry, In Situ Hybridization, Fluorescence, Lymph Nodes, Male, Neoplasm Invasiveness, Neoplasm Staging, Neuroendocrine Tumors, Rare Diseases, Sarcoma, Ewing, Thyroid Neoplasms, Thyroidectomy, Treatment Outcome, Young Adult, blood, diagnosis, drug therapy, met…	Head & neck	35	eng	11	E346	50	10.1002/hed.23240	BACKGROUND: Neuroendocrine tumors of the thyroid encompass a wide differential diagnosis. The most common is medullary thyroid carcinoma. One must consider other possibilities when a neuroendocrine thyroid tumor is calcitonin negative. We report 2 cases of Ewing sarcoma of the thyroid and discuss the differential diagnosis and workup of a calcitonin-negative neuroendocrine tumor of the thyroid. M…			309
679	CHAP	Williams Syndrome.	Morris, Colleen A	1993///				eng					CLINICAL CHARACTERISTICS: Williams syndrome (WS) is characterized by cardiovascular disease (elastin arteriopathy, peripheral pulmonary stenosis, supravalvar aortic stenosis, hypertension), distinctive facies, connective tissue abnormalities, intellectual disability (usually mild), a specific cognitive profile, unique personality characteristics, growth abnormalities, and endocrine abnormalities …	defaultdict(<class 'list'>, {'ED': ['Adam, Margaret P', 'Ardinger, Holly H', 'Pagon, Roberta A', 'Wallace, Stephanie E', 'Bean, Lora J H', 'Mirzaa, Ghayda', 'Amemiya, Anne']})		310
353	JOUR	Localization of fertility factor SP22 to specific cell types within the anterior pituitary gland.	Benoit, Allison M, McCoy, George L, Blake, Charles A	2005/11//	Animals, Blotting, Western, Cricetinae, Fluorescent Antibody Technique, Indirect, Immunohistochemistry, Male, Mesocricetus, Microscopy, Confocal, Microtubule-Associated Proteins, Orchiectomy, Pituitary Gland, Anterior, Protein Deglycase DJ-1, RNA, Messenger, Rats, Rats, Inbred Strains, cytology, genetics, metabolism	Experimental biology and medicine (Maywood, N.J.)	230	eng	10	721	730	10.1177/153537020523001005	Sperm protein 22 (SP22) was recently identified in the anterior pituitary gland (AP) of male Golden Syrian hamsters using ion trap mass spectrometry. SP22 has been implicated in apoptosis, androgen receptor function, fertility, and ontogeny of early-onset Parkinson's disease. However, the role of SP22 in the pituitary has not been investigated. We cloned the cDNA for full-length SP22 from AP and …			311
221	JOUR	Molecular detection of PPAR gamma rearrangements and thyroid carcinoma in preoperative fine-needle aspiration biopsies.	French, Christopher A, Fletcher, Jonathan A, Cibas, Edmund S, Caulfield, Christopher, Allard, Paulette, Kroll, Todd G	2008///	Adenocarcinoma, Follicular, Adolescent, Adult, Aged, Biomarkers, Tumor, Biopsy, Fine-Needle, Female, Gene Rearrangement, Humans, In Situ Hybridization, Fluorescence, Male, Middle Aged, PPAR gamma, Thyroid Neoplasms, genetics, pathology, surgery	Endocrine pathology	19	eng	3	166	174	10.1007/s12022-008-9036-0	The pathologic diagnosis of thyroid follicular tumors is difficult, particularly in preoperative fine-needle aspiration biopsies. To investigate whether the molecular diagnosis of PPAR gamma rearrangements can detect thyroid carcinomas in fine-needle aspiration biopsies, we performed interphase fluorescence in situ hybridization on 24 thyroid fine-needle aspiration and 17 follow-up thyroidectomy …			312
261	JOUR	Thyroid fetal male microchimerisms in mothers with thyroid disorders: presence of Y-chromosomal immunofluorescence in thyroid-infiltrating lymphocytes is more prevalent in Hashimoto's thyroiditis and Graves' disease than in follicular adenomas.	RennÃ©, Christoph, Ramos Lopez, Elizabeth, Steimle-Grauer, Susanne A, Ziolkowski, Piotr, Pani, Michael A, Luther, Christina, Holzer, Katharina, Encke, Albrecht, Wahl, Robert A, Bechstein, Wolf O, Usadel, Klaus H, Hansmann, Martin-Leo, Badenhoop, Klaus	2004/11//	Adenoma, Adult, Aged, Alleles, Antigens, CD20, CD3 Complex, Chimera, Chromosomes, Human, Y, Female, Fluorescent Antibody Technique, Graves Disease, HLA-DQ Antigens, Humans, Lymphocytes, Male, Middle Aged, Pregnancy, Retrospective Studies, Thyroid Diseases, Thyroid Gland, Thyroiditis, Autoimmune, analysis, genetics, pathology, ultrastructure	The Journal of clinical endocrinology and metabolism	89	eng	11	5810	5814	10.1210/jc.2004-1049	The presence of fetal cells in a maternal compartment is defined as fetal-maternal microchimerism, which has been detected in thyroids of mothers suffering from autoimmunity. We analyzed the immunohistology of paraffin-embedded thyroid specimen taken at surgery from 49 women with Hashimoto's thyroiditis (n = 25), Graves' disease (n = 15), or nodular or diffuse follicular adenomas (n = 9), whose c…			313
252	JOUR	MicroRNA-142-5p contributes to Hashimoto's thyroiditis by targeting CLDN1.	Zhu, Jin, Zhang, Yuehua, Zhang, Weichen, Zhang, Wei, Fan, Linni, Wang, Lu, Liu, Yixiong, Liu, Shasha, Guo, Ying, Wang, Yingmei, Yi, Jun, Yan, Qingguo, Wang, Zhe, Huang, Gaosheng	2016/06//	Antibodies, Cell Membrane Permeability, Claudin-1, Epithelium, Fluorescent Antibody Technique, Gene Expression Profiling, Humans, In Situ Hybridization, MicroRNAs, Oligonucleotide Array Sequence Analysis, Oligonucleotide Probes, Oligonucleotides, RNA, Messenger, Real-Time Polymerase Chain Reaction, Reproducibility of Results, Thyroglobulin, Thyroid Epithelial Cells, Thyroid Gland, Thyroiditis, ge…	Journal of translational medicine	14	eng	1	166	166	10.1186/s12967-016-0917-6	BACKGROUND: MicroRNAs have the potential as diagnostic biomarkers and therapeutic targets in autoimmune diseases. However, very limited studies have evaluated the expression of microRNA profile in thyroid gland related to Hashimoto's thyroiditis (HT). METHODS: MicroRNA microarray expression profiling was performed and validated by quantitative RT-PCR. The expression pattern of miR-142-5p was dete…			314
643	JOUR	Targeted molecular therapy of anaplastic thyroid carcinoma with AEE788.	Kim, Seungwon, Schiff, Bradley A, Yigitbasi, Orhan G, Doan, Dao, Jasser, Samar A, Bekele, B Nebiyou, Mandal, Mahitosh, Myers, Jeffrey N	2005/04//	Animals, Antineoplastic Agents, Apoptosis, Blotting, Western, Carcinoma, Cell Death, Cell Proliferation, Dose-Response Relationship, Drug, Endothelium, Vascular, ErbB Receptors, Humans, Immunohistochemistry, Male, Mice, Mice, Nude, Microcirculation, Microscopy, Fluorescence, Neoplasm Transplantation, Paclitaxel, Phosphorylation, Purines, Receptors, Vascular Endothelial Growth Factor, Thyroid Neop…	Molecular cancer therapeutics	4	eng	4	632	640	10.1158/1535-7163.MCT-04-0293	Anaplastic thyroid carcinoma (ATC) is one of the most aggressive human malignancies with a mean survival of only 6 months. The poor prognosis of patients with ATC reflects the current lack of curative therapeutic options and the need for development of novel therapeutic strategies. In this study, we report the results of a preclinical study of AEE788, a dual inhibitor of epidermal growth factor r…			315
522	JOUR	Specific autoantibodies to gut epithelium in two infants with severe protracted diarrhoea.	Savage, M O, Mirakian, R, Wozniak, E R, Jenkins, H R, Malone, M, Phillips, A D, Milla, P J, Bottazzo, G F, Harries, J T	1985/04//	Antibody Specificity, Autoantibodies, Biopsy, Diabetes Mellitus, Type 1, Diarrhea, Infantile, Epithelium, Fluorescent Antibody Technique, Histocompatibility Testing, Humans, Hypothyroidism, Immunoenzyme Techniques, Immunoglobulin G, Immunoglobulin M, Infant, Intestines, Jejunum, Male, Microscopy, Electron, Pancreas, Pancreatic Function Tests, Thyroid Function Tests, Time Factors, analysis, immuno…	Journal of pediatric gastroenterology and nutrition	4	eng	2	187	195	10.1097/00005176-198504000-00006	Two male infants with severe protracted diarrhoea presenting at 4 months (patient 1) and 10 weeks (patient 2) of age are reported. In both patients jejunal biopsy showed subtotal villous atrophy. Both had specific complement-fixing autoantibodies reacting by immunofluorescence with human duodenal, jejunal, and colonic epithelium. Patient 1 also had hypothyroidism and type 1 diabetes mellitus with…			316
234	JOUR	Cyclin D1 in well differentiated thyroid tumour of uncertain malignant potential.	Lamba Saini, Monika, Weynand, Birgit, Rahier, Jacques, Mourad, Michel, Hamoir, Marc, Marbaix, Etienne	2015/04//	Adenocarcinoma, Follicular, Adenoma, Adolescent, Adult, Biomarkers, Tumor, Biopsy, Carcinoma, Carcinoma, Papillary, Cell Differentiation, Cyclin D1, Female, Galectin 3, Gene Amplification, Humans, Immunohistochemistry, In Situ Hybridization, Fluorescence, Keratin-19, Ki-67 Antigen, Male, Middle Aged, Predictive Value of Tests, Thyroid Cancer, Papillary, Thyroid Neoplasms, Up-Regulation, analysis,…	Diagnostic pathology	10	eng		32	32	10.1186/s13000-015-0262-8	BACKGROUND: Encapsulated follicular tumours with equivocal papillary thyroid carcinoma (PTC) type nuclear features continue to remain a challenge despite the recent attempts to classify these borderline lesions. The term 'well differentiated tumour of uncertain malignant potential (WDT-UMP)' was introduced to classify these tumours. The present study aimed to evaluate the role of a cell cycle reg…			317
345	JOUR	Specific subtelomere loss on chromosome der(11)t(3;11)(q23;q23)x2 in anaplastic thyroid cancer cell line OCUT-1.	Kammori, Makoto, Onoda, Naoyoshi, Nakamura, Ken-Ichi, Izumiyama, Naotaka, Ogisawa, Kana, Kurabayashi, Rie, Ogawa, Toshihisa, Kaminishi, Michio, Poon, Steven S S, Takubo, Kaiyo	2006/07//	Cell Line, Tumor, Chromosome Banding, Chromosomes, Human, Pair 11, Chromosomes, Human, Pair 3, DNA-Binding Proteins, Humans, In Situ Hybridization, Fluorescence, Karyotyping, RNA, Messenger, Reverse Transcriptase Polymerase Chain Reaction, Telomerase, Telomere, Thyroid Neoplasms, Translocation, Genetic, genetics, metabolism, pathology	International journal of molecular medicine	18	eng	1	9	16		One of the most aggressive human malignancies, anaplastic thyroid carcinoma (ATC), has an extremely poor prognosis that may be explained by its genomic instability. We hypothesized that the very rapid cell turnover observed in ATC might accelerate telomere shortening and chromosomal instability associated with tumor cell malignancy. To compare and measure chromosomal aberrations and telomere shor…			318
140	JOUR	[Effects of miR-141-3p on proliferation, migration and NF-ÎºB signaling pathways in gastric cancer cells].	Wang, F, Yang, J X, Chen, Z N	2020/07//	Cell Line, Tumor, Cell Proliferation, Humans, MicroRNAs, NF-kappa B, Signal Transduction, Stomach Neoplasms, genetics, metabolism, physiology	Zhonghua zhong liu za zhi [Chinese journal of oncology]	42	chi	7	556	559	10.3760/cma.j.cn112152-20190625-00395	Objective: To investigate the effects of miR-141-3p on proliferation and migration of gastric cancer cells and nuclear factor-ÎºB (NF-ÎºB) signaling pathway. Methods: Human gastric cancer cell line BGC-823 was cultured, and miR-141-3p mimetic (miR-141-3p mimics) was transfected into BGC-823 cells by lipofection. The miR-141-3p overexpressed BGC was constructed. Real-time fluorescence quantitative…			319
602	JOUR	High density lipoprotein coated calcium carbonate nanoparticle for chemotherapy of breast cancer.	Wei, Kai, Zhang, Jiaming, Li, Xun, Shi, Pengfei, Fu, Peng	2019/08//	Animals, Antibiotics, Antineoplastic, Breast Neoplasms, Calcium Carbonate, Coated Materials, Biocompatible, Doxorubicin, Drug Carriers, Drug Liberation, Female, Fluorescent Dyes, Humans, Lipoproteins, HDL, MCF-7 Cells, Male, Mice, Nude, Nanoparticles, Neoplasms, Experimental, Optical Imaging, Propylamines, Silanes, Surface Properties, chemistry, drug therapy	Journal of biomaterials applications	34	eng	2	178	187	10.1177/0885328219850759				320
397	JOUR	Experimental autoimmune thyroiditis: attempt to correlate disease development with lymphocyte subset changes.	Smith, E, Behan, W M, Menzies, C B, Behan, P O	1987/02//	Animals, Disease Susceptibility, Female, Male, Rats, Rats, Inbred Strains, T-Lymphocytes, T-Lymphocytes, Helper-Inducer, T-Lymphocytes, Regulatory, Thymectomy, Thyroiditis, Autoimmune, Whole-Body Irradiation, classification, etiology, immunology	Clinical and experimental immunology	67	eng	2	319	325		An attempt was made to correlate lymphocyte subset abnormalities with the development of experimental autoimmune thyroiditis (EAIT) in thymectomized and irradiated rats of five inbred strains. The peripheral blood subpopulations were analysed using the fluorescence-activated cell sorter (FACS-IV). A significant lymphopenia with a severe decrease in helper T cells was identified in all the treated…			321
527	JOUR	Aberrant expression of HLA-DR antigens on bileduct epithelium in primary biliary cirrhosis: relevance to pathogenesis.	Ballardini, G, Mirakian, R, Bianchi, F B, Pisi, E, Doniach, D, Bottazzo, G F	1984/11//	Adult, Aged, Bile Ducts, Biopsy, Needle, Epithelium, Female, Fluorescent Antibody Technique, HLA Antigens, HLA-DR Antigens, Histocompatibility Antigens Class II, Humans, Leukocyte Count, Liver, Liver Cirrhosis, Biliary, Liver Diseases, Middle Aged, Staining and Labeling, T-Lymphocytes, analysis, immunology, pathology	Lancet (London, England)	2	eng	8410	1009	1013	10.1016/s0140-6736(84)91108-5	Direct immunofluorescence with an avidinbiotin system was used to investigate the expression of MHC molecules HLA-DR and HLA-A,B,C on bileducts in cryostat sections from 10 primary biliary cirrhosis (PBC) patients. Needle biopsy specimens from 55 patients with various chronic liver disorders, surgical biopsy specimens from 2 patients with recurrent secondary cholangitis, and 4 normal livers were …			322
219	JOUR	Effect of cell phone-like electromagnetic radiation on primary human thyroid cells.	Silva, Veronica, Hilly, Ohad, Strenov, Yulia, Tzabari, Cochava, Hauptman, Yirmi, Feinmesser, Raphael	2016///	Absorption, Radiation, Adult, Carcinogenesis, Cell Phone, Cell Proliferation, Cell Survival, Cells, Cultured, Dose-Response Relationship, Radiation, Electromagnetic Fields, Female, Humans, Male, Microwaves, Middle Aged, Radiation Dosage, Radiation Exposure, Thyroid Gland, Young Adult, analysis, cytology, metabolism, physiology, radiation effects	International journal of radiation biology	92	eng	2	107	115	10.3109/09553002.2016.1117678	PURPOSE: To evaluate the potential carcinogenic effects of radiofrequency energy (RFE) emitted by cell phones on human thyroid primary cells. MATERIALS AND METHODS: Primary thyroid cell culture was prepared from normal thyroid tissue obtained from patients who underwent surgery at our department. Subconfluent thyroid cells were irradiated under different conditions inside a cell incubator using a…			323
559	JOUR	Cocaine- and amphetamine-regulated transcript in neuroendocrine tumors.	Landerholm, Kalle, Falkmer, Sture E, JÃ¤rhult, Johannes, Sundler, Frank, Wierup, Nils	2011///	Carcinoid Tumor, Carcinoma, Neuroendocrine, Gastrointestinal Neoplasms, Gene Expression Regulation, Neoplastic, Humans, Immunohistochemistry, In Situ Hybridization, Fluorescence, Neoplasm Grading, Nerve Tissue Proteins, Neuroendocrine Tumors, Pancreatic Neoplasms, RNA, Messenger, Thyroid Neoplasms, analysis, genetics, metabolism, pathology	Neuroendocrinology	94	eng	3	228	236	10.1159/000329044	BACKGROUND/AIMS: Cocaine- and amphetamine-regulated transcript (CART) is an anorexigenic regulatory peptide highly expressed in the brain's appetite control centers, but also in peripheral neurons and in endocrine cells in the adrenal medulla, thyroid, pancreatic islets, and in the gastrointestinal tract. Plasma levels of CART were recently shown to be elevated in patients with neuroendocrine tum…			324
455	JOUR	Euthyroid goiters in children: correlation of needle biopsy with other clinical and laboratory findings in chronic lymphocytic thyroiditis and simple goiter.	Ling, S M, Kaplan, S A, Weitzman, J J, Reed, G B, Costin, G, Landing, B H	1969/11//	Adolescent, Age Factors, Autoantibodies, Biopsy, Child, Child, Preschool, Chronic Disease, Female, Fluorescent Antibody Technique, Goiter, Hemagglutination Tests, Humans, Male, Methods, Sex Factors, Thyroid Function Tests, Thyroiditis, Autoimmune, analysis, diagnosis, pathology	Pediatrics	44	eng	5	695	708					325
463	JOUR	Sympathetic innervation of the mouse thyroid and its significance in thyroid hormone secretion.	Melander, A, Ericson, L E, Sundler, F, Ingbar, S H	1974/04//	Animals, Autoradiography, Female, Hydroxydopamines, Iodine Radioisotopes, Mice, Microscopy, Electron, Microscopy, Fluorescence, Norepinephrine, Sympathectomy, Thyroid Gland, Thyroid Hormones, Tritium, innervation, metabolism, pharmacology	Endocrinology	94	eng	4	959	966	10.1210/endo-94-4-959				326
592	JOUR	NTRK fusion analysis reveals enrichment in Middle Eastern BRAF wild-type PTC.	Kong, Yan, Bu, Rong, Parvathareddy, Sandeep Kumar, Siraj, Abdul K, Siraj, Nabil, Al-Sobhi, Saif S, Al-Dayel, Fouad, Al-Kuraya, Khawla S	2021/04//	Adolescent, Adult, Aged, Aged, 80 and over, Child, Female, Gene Fusion, Humans, Immunohistochemistry, In Situ Hybridization, Fluorescence, Lymphatic Metastasis, Male, Membrane Glycoproteins, Middle Aged, Proto-Oncogene Proteins B-raf, Receptor, trkA, Receptor, trkB, Receptor, trkC, Saudi Arabia, Thyroid Cancer, Papillary, Thyroid Neoplasms, chemistry, genetics, pathology	European journal of endocrinology	184	eng	4	503	511	10.1530/EJE-20-1345	OBJECTIVE: Fusions involving neurotrophic tyrosine receptor kinase (NTRK) are known oncogenic drivers in a broad range of tumor types. It recently gained attention as a predictor of targeted therapy since selective NTRK inhibitors are now approved in the US and Europe for patients with solid tumors harboring gene fusions. However, estimation of NTRK gene fusion/alteration frequency and its clinic…			327
426	JOUR	Cyclin-dependent kinase inhibitor p27(Kip1) expression in thyroid cells obtained by fine-needle aspiration biopsy: a preliminary report.	Troncone, G, Fulciniti, F, Zeppa, P, Vetrani, A, Caleo, A, Palombini, L	2000/08//	Adenocarcinoma, Follicular, Biopsy, Needle, Carcinoma, Papillary, Cell Cycle Proteins, Cell Line, Cyclin-Dependent Kinase Inhibitor p27, Enzyme Inhibitors, Fluorescent Antibody Technique, Indirect, Goiter, Nodular, Humans, Microtubule-Associated Proteins, Prospective Studies, Thyroid Gland, Thyroid Neoplasms, Tumor Suppressor Proteins, diagnosis, metabolism, pathology	Diagnostic cytopathology	23	eng	2	77	81	10.1002/1097-0339(200008)23:2<77::aid-dc2>3.0.co;2-6	Recent studies on paraffin-embedded tissue have shown that the cyclin-dependent kinase inhibitor p27(Kip1) is expressed in normal thyroid cells, whereas it is downregulated in neoplastic cells. This prospective study was undertaken to assess whether p27(Kip1) staining may also be applied to fine-needle aspiration biopsy (FNAB) samples of the thyroid. We present here our preliminary results on 100…			328
429	JOUR	Thyroid hormone dependency in immature but not mature grafted locus coeruleus neurons. Evidence from intraocular innervation of iris transplants.	Granholm, A C, Seiger, A	1981/02//	Adrenergic Fibers, Animals, Culture Techniques, Female, Iris, Locus Coeruleus, Male, Microscopy, Fluorescence, Neurons, Rats, Thyroid Hormones, Thyroidectomy, Transplantation, Homologous, drug effects, innervation, pharmacology, physiology, physiopathology, transplantation	Medical biology	59	eng	1	51	57		Fetal brain tissue pieces containing locus coeruleus noradrenaline neurons were combined with sequentially or simultaneously grafted irides in the anterior eye chamber of thyroidectomized or normal host rats. The aim was to reveal possible morphological alterations in the adrenergic fibres innervating the iris grafts, induced by thyroid hormone deficiency, and to compare that possible hormone dep…			329
445	JOUR	[Graves-Basedow disease after allogeneic bone marrow transplantation].	Jakubas, Beata, Kostecka-Matyja, Marta, Darczuk, Andrzej, Gil, Justyna	2006///	Adult, Anemia, Aplastic, Autoantibodies, Bone Marrow Transplantation, Female, Graft vs Host Disease, Graves Disease, Humans, Immunoglobulins, Thyroid-Stimulating, Thyroiditis, Autoimmune, Transplantation, Homologous, Treatment Outcome, adverse effects, blood, immunology	Endokrynologia Polska	57	pol	5	541	543		One severe aplastic anaemia case who presented autoimmune thyroid disease after allogeneic bone marrow transplantation (alloBMT) is described. A 19 year old Polish girl developed Graves' hyperthyroidisms 19 months after allogeneic BMT for severe aplastic anaemia (SAA) donated from her brother. Her serum was positive for thyroid stimulating antibody (TSAb) and anti-thyroid peroxidase autoantibodie…			330
560	JOUR	Uncommon mutation, but common amplifications, of the PIK3CA gene in thyroid tumors.	Wu, Guojun, Mambo, Elizabeth, Guo, Zhongmin, Hu, Shuiying, Huang, Xin, Gollin, Susanne M, Trink, Barry, Ladenson, Paul W, Sidransky, David, Xing, Mingzhao	2005/08//	Class I Phosphatidylinositol 3-Kinases, Gene Amplification, Humans, In Situ Hybridization, Fluorescence, Mutation, Missense, Phosphatidylinositol 3-Kinases, Protein-Serine-Threonine Kinases, Proto-Oncogene Proteins, Proto-Oncogene Proteins c-akt, Signal Transduction, Thyroid Neoplasms, genetics, metabolism	The Journal of clinical endocrinology and metabolism	90	eng	8	4688	4693	10.1210/jc.2004-2281	CONTEXT: As in many other human cancers, overactivation of the phosphotidylinositol 3-kinase (PI3K)/Akt signaling pathway occurs frequently in thyroid cancer, but the mechanism is not completely clear. OBJECTIVE: Because activating mutations and genomic amplification of the PIK3CA gene, which encodes the p110a catalytic subunit of PI3K, are common in many cancers, we sought to investigate this ph…			331
575	JOUR	A Novel Diagnostic Method for Thyroid Follicular Tumors Based on Immunofluorescence Analysis of p53-Binding Protein 1 Expression: Detection of Genomic Instability.	Otsubo, Ryota, Matsuda, Katsuya, Mussazhanova, Zhanna, Sato, Ayako, Matsumoto, Megumi, Yano, Hiroshi, Oikawa, Masahiro, Kondo, Hisayoshi, Ito, Masahiro, Miyauchi, Akira, Hirokawa, Mitsuyoshi, Nagayasu, Takeshi, Nakashima, Masahiro	2019/05//	Adenocarcinoma, Follicular, Adenoma, Adult, Aged, Comparative Genomic Hybridization, DNA Copy Number Variations, Female, Fluorescent Antibody Technique, Genomic Instability, Humans, Male, Middle Aged, Thyroid Neoplasms, Tumor Suppressor p53-Binding Protein 1, analysis, chemistry, diagnosis, genetics, methods	Thyroid : official journal of the American Thyroid Association	29	eng	5	657	665	10.1089/thy.2018.0548	Background: The preoperative diagnosis of thyroid follicular carcinomas (FCs) by fine-needle aspiration cytology is almost impossible. It was previously demonstrated that p53-binding protein 1 (53BP1) expression, based on immunofluorescence (IF), can serve as a valuable biomarker to estimate the malignant potential of various cancers. 53BP1 belongs to a class of DNA damage response molecules that…			332
312	JOUR	Discovery of targeting peptides for selective therapy of medullary thyroid carcinoma.	BÃ¶ckmann, Miriam, Drosten, Matthias, PÃ¼tzer, Brigitte M	2005/02//	Animals, Bacteriophages, Carcinoma, Cell Line, Coxsackie and Adenovirus Receptor-Like Membrane Protein, DNA Primers, Electrophoresis, Polyacrylamide Gel, Enzyme-Linked Immunosorbent Assay, Female, Fluorescent Antibody Technique, Genetic Therapy, Genetic Vectors, Humans, Integrin alphaV, Mice, Mice, Nude, Peptide Library, Peptides, Receptors, Virus, Reverse Transcriptase Polymerase Chain Reaction,…	The journal of gene medicine	7	eng	2	179	188	10.1002/jgm.648	BACKGROUND: Adenovirus efficiently infects a broad range of target cells, thereby preventing selective gene transfer. Moreover, several cell types and tissues including primary tumors are refractory to adenoviral infection, mainly because of low expression levels of coxsackie-adenovirus receptor (CAR). Thus, identification of cancer-selective ligands which yield gene transfer to neoplastic cells …			333
240	JOUR	From fine-needle aspiration cytology to fluorescent in-situ hybridization in an unusual case of pharyngeal synovial sarcoma.	Paolino, Gaetano, Girolami, Ilaria, Bernasconi, Riccardo, Beccari, Serena, Marchioni, Daniele, Molteni, Gabriele, De Robertis, Riccardo, Ghimenton, Claudio, CaliÃ², Anna, Brunelli, Matteo, Eccher, Albino	2019/10//	Biopsy, Fine-Needle, Genetic Testing, Humans, In Situ Hybridization, Fluorescence, Male, Pharyngeal Neoplasms, Proto-Oncogene Proteins, Repressor Proteins, Sarcoma, Synovial, Young Adult, genetics, pathology	Diagnostic cytopathology	47	eng	10	1067	1071	10.1002/dc.24274	Synovial sarcoma arising in the pharynx is a rare entity, with very few cases described in literature, mainly as surgical-oriented case reports. We report the case of a healthy 20-year old man who presented with a painless right neck mass, clinically suspicious for a thyroid nodule. Ultrasound scan and fine-needle aspiration cytology failed to provide a definitive result, although suggesting a me…			334
503	JOUR	[CONTRIBUTIONS TO IMMUNOTHYROIDITIS. I. SEROLOGICAL FLUORESCENCE HISTOLOGICAL STUDIES IN HASHIMOTO'S THYROIDITIS].	FEDERLIN, K, OPPERMANN, W, PFEIFFER, E F	1965/02//	Autoimmune Diseases, Biopsy, Fluorescence, Fluorescent Antibody Technique, Hemadsorption, Hemadsorption Inhibition Tests, Hemagglutination, Hemagglutination Tests, Humans, Immunodiffusion, Immunoelectrophoresis, Latex Fixation Tests, Myxedema, Pathology, Thyroiditis, Thyroiditis, Autoimmune	Deutsche medizinische Wochenschrift (1946)	90	ger		247	255	10.1055/s-0028-1111326				335
561	JOUR	Thyroid Hormone in the Pathogenesis of Congenital Intestinal Dysganglionosis.	Wang, Fang, Jing, Ping, Zhan, Peiyan, Zhang, Hongyi	2020/08//	Animals, Biomarkers, Cell Differentiation, Cell Movement, Cell Proliferation, Congenital Hypothyroidism, Enteric Nervous System, Flow Cytometry, Gastrointestinal Motility, Hirschsprung Disease, Neural Crest, Thyroid Hormones, Zebrafish, complications, embryology, metabolism, pathology	Pediatric and developmental pathology : the official journal of the Society for Pediatric Pathology and the Paediatric Pathology Society	23	eng	4	285	295	10.1177/1093526620908984	INTRODUCTION: The objective of this study is to investigate the role of thyroid hormone (TH) in the pathogenesis of intestinal dysganglionosis (ID). METHODS: A zebrafish model of congenital hypothyroidism (CH) was created by exposing the larvae to the 6-propyl-2-thiouracil (PTU). The enteric neurons were labeled with anti-HuC/D antibodies. The number of enteric neurons was counted. The larval int…			336
634	JOUR	CSPG4 Is a Potential Therapeutic Target in Anaplastic Thyroid Cancer.	Egan, Caitlin E, Stefanova, Dessislava, Ahmed, Adnan, Raja, Vijay J, Thiesmeyer, Jessica W, Chen, Kevin J, Greenberg, Jacques A, Zhang, Taotao, He, Bing, Finnerty, Brendan M, Zarnegar, Rasa, Jin, Moonsoo M, Scognamiglio, Theresa, Dephoure, Noah, Fahey, Thomas 3rd, Min, Irene M	2021/07//		Thyroid : official journal of the American Thyroid Association		eng				10.1089/thy.2021.0067	Background: Anaplastic thyroid cancer (ATC) is a rare cancer with poor prognosis and few treatment options. The objective of this study was to investigate new immune-associated therapeutic targets by identifying ATC-derived, human leukocyte antigen (HLA) class II-presenting peptides. One protein that generated multiple peptides in ATC was chondroitin sulfate-proteoglycan-4 (CSPG4), a transmembran…			337
716	JOUR	Recombinant attenuated Salmonella typhimurium carrying a plasmid co-expressing ENDO-VEGI151 and survivin siRNA inhibits the growth of breast cancer in vivo.	Li, Zhe, Yin, Pei-Hao, Yang, Sheng-Sheng, Li, Qian-Yu, Chang, Tao, Fang, Lin, Shi, Lin-Xiang, Fang, Guo-En	2013/04//	Animals, Apoptosis, Breast Neoplasms, Cell Line, Tumor, Female, Gene Expression Regulation, Neoplastic, Genetic Therapy, Genetic Vectors, Humans, Inhibitor of Apoptosis Proteins, Mice, Plasmids, RNA, Small Interfering, Salmonella typhimurium, Survivin, Tumor Necrosis Factor Ligand Superfamily Member 15, Vaccines, Attenuated, Xenograft Model Antitumor Assays, administration & dosage, genetics, imm…	Molecular medicine reports	7	eng	4	1215	1222	10.3892/mmr.2013.1308	The aim of this study was to investigate the antitumor effect of a plasmid co-expressing ENDO-VEGI151 and survivin siRNA on breast cancer in nude mice, and to explore the feasibility of attenuated Salmonella typhimurium (S. typhimurium) as a delivery vector for cancer gene therapy in vivo. Three recombinant expression plasmids pENDOâVEGI151 (pEV), pSurvivin-siRNA (psi-survivin) and co-expressin…			338
468	JOUR	Intraocular fibre growth of grafted locus coeruleus neurons: sensory denervation counteracts alterations induced by thyroid hormone deficiency.	Seiger, A, Granholm, A C	1982/06//	Animals, Denervation, Eye, Iris, Locus Coeruleus, Male, Nerve Fibers, Rats, Rats, Inbred Strains, Thyroid Hormones, Thyroidectomy, Trigeminal Nerve, cytology, innervation, physiology, surgery, transplantation, ultrastructure	Medical biology	60	eng	3	159	164		Immature central noradrenaline neurons from the nucleus locus coeruleus were grafted to surgically thyroidectomized adult rats. As previously reported, fibre production from locus coeruleus in the host iris is hampered by thyroid hormone deficiency. We wanted to investigate if sensory denervation of the target iris tissue, a procedure known to enhance fibre production from locus coeruleus neurons…			339
631	JOUR	Array-CGH identifies cyclin D1 and UBCH10 amplicons in anaplastic thyroid carcinoma.	Lee, Jia-Jing, Au, Amy Y M, Foukakis, Theodoros, Barbaro, Michela, Kiss, Nimrod, Clifton-Bligh, Roderick, Staaf, Johan, Borg, Ake, Delbridge, Leigh, Robinson, Bruce G, Wallin, GÃ¶ran, HÃ¶Ã¶g, Anders, Larsson, Catharina	2008/09//	Aged, Aged, 80 and over, Carcinoma, Chromosomes, Human, Pair 20, Comparative Genomic Hybridization, Female, Gene Amplification, Gene Dosage, Gene Expression Profiling, Genes, bcl-1, Humans, Male, Middle Aged, Mutation, Oligonucleotide Array Sequence Analysis, Proto-Oncogene Proteins B-raf, Thyroid Neoplasms, Ubiquitin-Conjugating Enzymes, genetics, methods, physiology	Endocrine-related cancer	15	eng	3	801	815	10.1677/ERC-08-0018	Anaplastic thyroid cancer (ATC) is a rare but highly aggressive disease with largely unexplained etiology and molecular pathogenesis. In this study, we analyzed genome-wide copy number changes, BRAF (V-raf sarcoma viral oncogene homolog B1) mutations, and p16 and cyclin D1 expressions in a panel of ATC primary tumors. Three ATCs harbored the common BRAF mutation V600E. Using array-comparative gen…			340
483	JOUR	[Morphological methods in routine diagnostics. Round-table discussion at the occasion of the 4th Symposium of the German Section of the International Academy for Pathology in Hamburg, June 26-27, 1970. Rapid section technics].	Propst, A	1971///	Abdominal Muscles, Actinomycosis, Adenocarcinoma, Scirrhous, Biopsy, Breast Neoplasms, Female, Histological Techniques, Humans, Lymph Nodes, Methods, Microscopy, Fluorescence, Microtomy, Staining and Labeling, Thyroiditis, Time Factors, pathology	Beitrage zur Pathologie	142	ger	3	324	333					341
108	JOUR	The function and molecular mechanism of CEP55 in anaplastic thyroid cancer.	Li, Y-H, Xu, K-C, Huang, G-M, Zang, H-L	2020/09//	Cell Cycle Proteins, Cell Line, Tumor, Female, Humans, Male, Middle Aged, Thyroid Carcinoma, Anaplastic, Thyroid Neoplasms, diagnosis, genetics, metabolism	European review for medical and pharmacological sciences	24	eng	18	9549	9555	10.26355/eurrev_202009_23040	OBJECTIVE: The purpose of this study was to determine the role of centrosomal protein of 55 kDa (CEP55) in anaplastic thyroid cancer (ATC) and to further explore the mechanism, which might provide a new molecular marker for treatment of ATC. PATIENTS AND METHODS: The expression level of CEP55 in clinical cases was tested by fluorescence quantitative Real Time-Polymerase Chain Reaction (qRT-PCR). …			342
195	JOUR	Identification of a recurrent STRN/ALK fusion in thyroid carcinomas.	PÃ©rot, GaÃ«lle, Soubeyran, Isabelle, Ribeiro, AgnÃ¨s, Bonhomme, Benjamin, Savagner, FrÃ©dÃ©rique, Boutet-Bouzamondo, Nathalie, Hostein, Isabelle, Bonichon, FranÃ§oise, Godbert, Yann, Chibon, FrÃ©dÃ©ric	2014///	Anaplastic Lymphoma Kinase, Base Sequence, Calmodulin-Binding Proteins, Comparative Genomic Hybridization, Crizotinib, Gene Fusion, Gene Rearrangement, Humans, Immunohistochemistry, In Situ Hybridization, Fluorescence, Lung Neoplasms, Membrane Proteins, Molecular Sequence Data, Nerve Tissue Proteins, Pyrazoles, Pyridines, Receptor Protein-Tyrosine Kinases, Reverse Transcriptase Polymerase Chain R…	PloS one	9	eng	1	e87170	e87170	10.1371/journal.pone.0087170	Thyroid carcinoma is the most common endocrine malignant tumor and accounts for 1% of all new malignant diseases. Among all types and subtypes of thyroid cancers that have been described so far, papillary thyroid carcinoma is the most frequent. The standard management treatment of these tumors consists of surgery, followed by radioiodine treatment in case of high risk of relapse. The most aggress…			343
106	GEN	Mammary analog secretory carcinoma of the thyroid gland: A rare cancer harboring TRK fusion.	Huang, Nai-Si, Cao, Yi-Ming, Lu, Zhong-Wu, Guan, Qing, Chen, Jia-Ying, Ma, Ben, Chen, Tong-Zhen, Bai, Qian-Ming, Wang, Yu-Long, Ji, Qing-Hai	2021/04//		Oral oncology	115	eng		105092	105092	10.1016/j.oraloncology.2020.105092	Mammary analog secretory carcinoma (MASC), or secretory carcinoma of the thyroid is an extremely rare disease harboring ETV6-NTRK3 gene fusion with TRK activation. Here we report the twelfth case of MASC of the thyroid worldwide. A 36-year-old female was diagnosed with poor-differentiated thyroid carcinoma (PDTC). Pathology consultant and immunochemical workups showed the tumor cells were negativ…			344
710	JOUR	Apical and basal regulation of the permeability of the retinal pigment epithelium.	Peng, Shaomin, Rahner, Christoph, Rizzolo, Lawrence J	2003/02//	Animals, Blood, Cell Count, Cell Membrane Permeability, Cells, Cultured, Chick Embryo, Culture Media, Conditioned, Culture Media, Serum-Free, Electric Conductivity, Freeze Fracturing, Membrane Proteins, Microscopy, Fluorescence, Occludin, Pigment Epithelium of Eye, Tight Junctions, cytology, metabolism, physiology, ultrastructure	Investigative ophthalmology & visual science	44	eng	2	808	817	10.1167/iovs.02-0473	PURPOSE: The functional characteristics of tight junctions in the outer blood-retinal barrier change during embryonic development and in the presence of disease. A culture model of developing retinal pigment epithelium (RPE) was used to examine the regulation of the tight junctions. METHODS: RPE from chick embryos was cultured on filters that separated the apical and basal medium compartments. Cu…			345
374	JOUR	Effect of triiodothyronine on the expression of T cell markers and immune function in thyroidectomized White Leghorn chickens.	Johnson, B E, Marsh, J A, King, D B, Lillehoj, H S, Scanes, C G	1992/01//	Animals, Animals, Newborn, Antigens, Differentiation, T-Lymphocyte, CD3 Complex, CD4 Antigens, CD4-CD8 Ratio, CD8 Antigens, Chickens, Dose-Response Relationship, Drug, Flow Cytometry, Lymphocyte Activation, Propylthiouracil, Receptors, Antigen, T-Cell, T-Lymphocyte Subsets, T-Lymphocytes, Thyroidectomy, Thyroxine, Triiodothyronine, analysis, blood, drug effects, immunology, pharmacology	Proceedings of the Society for Experimental Biology and Medicine. Society for Experimental Biology and Medicine (New York, N.Y.)	199	eng	1	104	113	10.3181/00379727-199-43337	Hypothyroid K-strain chickens were produced by neonatal thyroidectomy and treatment with 6-propyl-2-thiouracil. Thyroidectomized birds were given 0, 1.5, 4.5, 15, or 45 micrograms/kg body wt of triiodothyronine (T3) by daily injection. At 5 weeks of age, thymocytes were prepared for flow cytometric analysis of CT-1a, CD3, CD4, and CD8 expression. Sham-operated birds had the smallest proportion of…			346
713	JOUR	Melatonin ameliorates anxiety and depression-like behaviors and modulates proteomic changes in triple transgenic mice of Alzheimer's disease.	Nie, Lulin, Wei, Gang, Peng, Shengming, Qu, Zhongsen, Yang, Ying, Yang, Qian, Huang, Xinfeng, Liu, Jianjun, Zhuang, Zhixiong, Yang, Xifei	2017/07//	Alzheimer Disease, Animals, Anxiety, Depression, Disease Models, Animal, Glutathione Transferase, Hippocampus, Humans, Maze Learning, Melatonin, Mice, Mice, Transgenic, Proteomics, drug therapy, genetics, metabolism, therapeutic use	BioFactors (Oxford, England)	43	eng	4	593	611	10.1002/biof.1369	Alzheimer's disease (AD) is a devastating neurodegenerative disease accompanied by neuropsychiatric symptoms, such as anxiety and depression. The levels of melatonin decrease in brains of AD patients. The potential effect of melatonin on anxiety and depression behaviors in AD and the underlying mechanisms remain unclear. In this study, we treated 10-month-old triple transgenic mice of AD (3xTg-AD…			347
633	JOUR	Synergy of a herpes oncolytic virus and paclitaxel for anaplastic thyroid cancer.	Lin, Shu-Fu, Gao, Sizhi Paul, Price, Daniel L, Li, Sen, Chou, Ting-Chao, Singh, Paramjeet, Huang, Yu-Yao, Fong, Yuman, Wong, Richard J	2008/03//	Acetylation, Animals, Antineoplastic Combined Chemotherapy Protocols, Apoptosis, Blotting, Western, Carcinoma, Cell Survival, Combined Modality Therapy, Doxorubicin, Female, Fluorescent Antibody Technique, Humans, Mice, Mice, Nude, Mitosis, Oncolytic Virotherapy, Oncolytic Viruses, Paclitaxel, Simplexvirus, Thyroid Neoplasms, Virus Replication, administration & dosage, drug effects, drug therapy,…	Clinical cancer research : an official journal of the American Association for Cancer Research	14	eng	5	1519	1528	10.1158/1078-0432.CCR-07-4628	PURPOSE: Novel therapeutic regimens are needed to improve the dismal outcomes of patients with anaplastic thyroid cancer (ATC). Oncolytic herpes simplex virus have shown promising activity against human ATC. We studied the application of oncolytic herpes simplex virus (G207 and NV1023) in combination with currently used chemotherapeutic drugs (paclitaxel and doxorubicin) for the treatment of ATC.…			348
421	JOUR	Autologous, orthotopic thyroid follicular cell transplantation: a surgical component of ex vivo somatic gene therapy.	O'Malley, B W Jr, Finegold, M J, Ledley, F D	1993/01//	Animals, Cell Survival, Cells, Cultured, Dogs, Epithelium, Genetic Therapy, Humans, Microscopy, Phase-Contrast, Sensitivity and Specificity, Thyroid Diseases, Thyroid Gland, Transplantation, Autologous, methods, pathology, transplantation, ultrastructure	Otolaryngology--head and neck surgery : official journal of American Academy of Otolaryngology-Head and Neck Surgery	108	eng	1	51	62	10.1177/019459989310800107	Ex vivo strategies for somatic gene therapy involve the harvest of primary cells from patients, the transfer of novel genetic material into these cells in cell culture, and reimplantation of the genetically engineered cells back into patients. In consideration of methods for targeting somatic gene therapy to the thyroid, we have studied the autologous, orthotopic transplantation of thyroid follic…			349
343	JOUR	Exon 5 of the RET proto-oncogene: a newly detected risk exon for familial medullary thyroid carcinoma, a novel germ-line mutation Gly321Arg.	Dvorakova, S, Vaclavikova, E, Duskova, J, Vlcek, P, Ryska, A, Bendlova, B	2005/11//	Adult, Aged, Arginine, Carcinoma, Medullary, Codon, DNA, Neoplasm, Exons, Female, Genetic Testing, Germ-Line Mutation, Glycine, Humans, Male, Middle Aged, Mutation, Missense, Pedigree, Point Mutation, Proto-Oncogene Proteins c-ret, Proto-Oncogenes, Thyroid Neoplasms, Thyroidectomy, analysis, diagnosis, genetics, surgery	Journal of endocrinological investigation	28	eng	10	905	909	10.1007/BF03345322	Familial medullary thyroid carcinoma (FMTC) is an autosomal dominant inherited disease, characterized by germ-line mutations in the RET proto-oncogene, mainly in exons 10 and 11, but also in exons 13, 14 and 15. Recently, mutations in exons 8 and 16 associated with FMTC were also described. In the herein presented study, single strand conformation polymorphism (SSCP) method for rapid screening of…			350
605	JOUR	Bilateral Tarsal Conjunctival Pigmentation After Eight Months of Minocycline Therapy.	Kudrna, Jeremy J, Eisenbeisz, H Carson, Huot, Christopher	2020/08//	Aged, Anti-Bacterial Agents, Conjunctiva, Female, Humans, Minocycline, Pigmentation, Pigmentation Disorders, Skin, adverse effects, chemically induced, drug effects	South Dakota medicine : the journal of the South Dakota State Medical Association	73	eng	8	360	365		A 71-year-old female presented to the ophthalmology clinic with bilateral brown to black pigmentary cysts in the lower palpebral conjunctiva following eight months of 100 mg twice daily oral minocycline therapy for long- standing pyoderma gangrenosum. Minocycline-induced pigmentation has been reported in skin, nails, teeth, mucosa, thyroid, bones, and sclera. To our knowledge, since 1981, only ei…			351
150	JOUR	Detection of Various Biomarkers and Enzymes via a Nanocluster-Based Fluorescence Turn-on Sensing Platform.	Zhao, Yue, Liu, Hou, Jiang, Yingnan, Song, Shanliang, Zhao, Yueqi, Zhang, Chuan, Xin, Jingwei, Yang, Bai, Lin, Quan	2018/12//	Biomarkers, Fluorescent Dyes, Humans, Hydrogen Peroxide, Metal Nanoparticles, Oxidoreductases, Silver, Spectrometry, Fluorescence, Urate Oxidase, Uric Acid, analysis, chemistry, metabolism	Analytical chemistry	90	eng	24	14578	14585	10.1021/acs.analchem.8b04691	The profiling of disease-related biomarkers is an essential procedure for the accurate diagnosis and intervention of metabolic disorders. Therefore, the development of ultrasensitive and highly selective fluorogenic biosensors for diverse biomarkers is extremely desirable. There is still a considerable challenge to prepare nanocluster-based fluorescence turn-on probes capable of recognizing multi…			352
263	JOUR	Involvement of the PAX8/peroxisome proliferator-activated receptor gamma rearrangement in follicular thyroid tumors.	Dwight, Trisha, Thoppe, Srinivasan R, Foukakis, Theodoros, Lui, Weng O, Wallin, GÃ¶ran, HÃ¶Ã¶g, Anders, Frisk, Tony, Larsson, Catharina, Zedenius, Jan	2003/09//	Adenoma, Adult, Aged, Aged, 80 and over, Blotting, Western, Carcinoma, Papillary, Follicular, DNA, Complementary, Female, Humans, In Situ Hybridization, Fluorescence, Interphase, Male, Middle Aged, Receptors, Cytoplasmic and Nuclear, Reverse Transcriptase Polymerase Chain Reaction, Thyroid Neoplasms, Thyroidectomy, Transcription Factors, Tumor Cells, Cultured, biosynthesis, genetics, metabolism, …	The Journal of clinical endocrinology and metabolism	88	eng	9	4440	4445	10.1210/jc.2002-021690	Recently, a translocation t(2; 3)(q13;p25), involving the fusion of PAX8 and peroxisome proliferator-activated receptor gamma (PPAR gamma) was suggested to arise only in follicular thyroid carcinomas. In this study, a group of 87 thyroid tumors were analyzed to determine the involvement of the PAX8/PPAR gamma fusion gene in these tumors, and also to determine whether this rearrangement can be use…			353
306	JOUR	Monosomy and ring chromosome 13 in a thyroid nodular goiter-do we underestimate its relevance in benign thyroid lesions?	Sendt, Wolfgang, Rippe, Volkhard, Flor, Inga, Drieschner, Norbert, Bullerdiek, JÃ¶rn	2012/03//	Chromosomes, Human, Pair 13, Cytogenetic Analysis, Cytogenetics, Female, Goiter, Nodular, Humans, In Situ Hybridization, Fluorescence, Karyotype, Karyotyping, Middle Aged, Ring Chromosomes, Thyroid Gland, Thyroid Nodule, Tumor Cells, Cultured, genetics, pathology	Cancer genetics	205	eng	3	128	130	10.1016/j.cancergen.2012.01.010	Classical cytogenetic examination of a thyroid nodular goiter revealed the existence of two different cytogenetically aberrant cell clones. They were characterized by monosomy 13 as the sole abnormality in one clone, and loss of one chromosome 13 and a ring chromosome that was found to consist of chromosome 13 material by fluorescence in situ hybridization in the other clone. We have concluded th…			354
472	JOUR	Urticarial vasculitis progressing to systemic lupus erythematosus.	Bisaccia, E, Adamo, V, Rozan, S W	1988/07//	Adult, Biopsy, Female, Fluorescent Antibody Technique, Humans, Lupus Erythematosus, Systemic, Skin, Urticaria, Vasculitis, complications, diagnosis, drug therapy, etiology, pathology	Archives of dermatology	124	eng	7	1088	1090		We encountered a patient with urticarial vasculitis. The lesions were urticarial target-shaped, lasting approximately 48 to 72 hours, accompanied by burning, photophobia, fever, and arthralgia. Initially, all studies for thyroid disease and lupus erythematosus were negative. However, after 20 months of follow-up, the patient developed autoimmune thyroidosis and systemic lupus erythematosus. We de…			355
217	JOUR	Thyroid sclerosing mucoepidermoid carcinoma with eosinophilia distinct from the salivary type.	Hirokawa, Mitsuyoshi, Takada, Nami, Abe, Hideyuki, Suzuki, Ayana, Higuchi, Miyoko, Miya, Akihiro, Hayashi, Toshitetsu, Fukushima, Mitsuhiro, Kawahara, Akihiko, Miyauchi, Akira	2018/04//	Adult, Aged, Carcinoma, Mucoepidermoid, Eosinophilia, Female, Humans, Middle Aged, Thyroid Gland, Thyroid Hormones, Thyroid Neoplasms, blood, complications, pathology	Endocrine journal	65	eng	4	427	436	10.1507/endocrj.EJ17-0462	We report three cases of thyroid sclerosing mucoepidermoid carcinoma with eosinophilia (SMECE), which is an extremely rare variant of mucoepidermoid carcinoma (MEC). The aims of this report were to describe the clinicopathological findings, including results from immunohistochemical and fluorescence in situ hybridization analysis of thyroid SMECE, as well as to discuss the distinction between thy…			356
531	JOUR	PGR Gene Fusions Identify a Molecular Subset of Uterine Epithelioid Leiomyosarcoma With Rhabdoid Features.	Chiang, Sarah, Samore, Wesley, Zhang, Lei, Sung, Yun-Shao, Turashvili, Gulisa, Murali, Rajmohan, Soslow, Robert A, Hensley, Martee L, Swanson, David, Dickson, Brendan C, Stewart, Colin J R, Oliva, Esther, Antonescu, Cristina R	2019/06//	Adult, Biomarkers, Tumor, DNA-Binding Proteins, Female, Gene Fusion, Gene Rearrangement, Genetic Predisposition to Disease, Humans, In Situ Hybridization, Fluorescence, Leiomyosarcoma, Middle Aged, Neoplasm Staging, Perivascular Epithelioid Cell Neoplasms, Phenotype, Receptors, Progesterone, Receptors, Steroid, Receptors, Thyroid Hormone, Retrospective Studies, Rhabdoid Tumor, Sarcoma, Endometria…	The American journal of surgical pathology	43	eng	6	810	818	10.1097/PAS.0000000000001239	Genetic aberrations among uterine epithelioid leiomyosarcomas are unknown. Following identification of an index case with NR4A3-PGR fusion demonstrating monomorphic morphologic features, we interrogated additional uterine tumors demonstrating similar histology and sought to describe the morphologic and immunohistochemical characteristics of PGR-rearranged sarcomas. Targeted next-generation RNA se…			357
613	JOUR	USP33 is a Biomarker of Disease Recurrence in Papillary Thyroid Carcinoma.	Jia, Meng, Guo, Yaman, Lu, Xiubo	2018///	Adult, Biomarkers, Tumor, Carcinoma, Papillary, Caspases, Cell Line, Tumor, Cell Movement, Cell Proliferation, Cell Survival, Disease-Free Survival, Down-Regulation, Female, Humans, Kaplan-Meier Estimate, Male, Middle Aged, Neoplasm Recurrence, Local, Neoplasm Staging, Nerve Tissue Proteins, Prognosis, RNA Interference, RNA, Small Interfering, Receptors, Immunologic, Signal Transduction, Thyroid …	Cellular physiology and biochemistry : international journal of experimental cellular physiology, biochemistry, and pharmacology	45	eng	5	2044	2053	10.1159/000488041	BACKGROUND/AIMS: To investigate the clinical significance and functional mechanisms of deubiquitinase USP33 in papillary thyroid carcinoma (PTC). METHODS: Immunohistochemistry staining was conducted to explore the expression of USP33 in PTC tissues and adjacent normal thyroid tissues. Patients' prognosis was evaluated by disease-free survival. The prognostic role of USP33 was tested by univariate…			358
490	JOUR	[Hashimoto's thyroiditis associated with pseudo-viral hepatitis: apropos of 2 cases in the same family].	Klotz, H P, Darnis, F	1972///	Adult, Antibodies, Antinuclear, Autoimmune Diseases, Biopsy, Needle, Diagnosis, Differential, Female, Fluorescent Antibody Technique, Hepatitis, Hepatitis A, Humans, Male, Thyroiditis, Autoimmune, Virus Diseases, analysis, complications, diagnosis, genetics, pathology	Annales d'endocrinologie	33	fre	4	399	403					359
487	JOUR	Differentiation of chronic lymphocytic thyroiditis and simple goiter in pediatrics.	Monteleone, J A, Danis, R K, Tung, K S, Ramos, C V, Peden, V H	1973/09//	Antibodies, Biopsy, Needle, Child, Diagnosis, Differential, Fluorescent Antibody Technique, Goiter, Humans, Methods, Serologic Tests, Thyroglobulin, Thyroid Function Tests, Thyroiditis, Autoimmune, Thyroxine-Binding Proteins, analysis, diagnosis, pathology	The Journal of pediatrics	83	eng	3	381	385	10.1016/s0022-3476(73)80259-8				360
617	JOUR	[Expression of microRNA-155 in papillary thyroid carcinoma and its clinical significance].	Zhu, You-Zhi, Zheng, Ke, Zhang, Hui-Hao, Chen, Ling, Wu, Kun-Lin, Ren, Cai-Hong, Wang, Zong-Cai, Kong, Ling-Jun, Ruan, Wei-Hong, Chen, Xiang-Jin	2016/10//	Carcinoma, Papillary, Humans, Lymph Nodes, Lymphatic Metastasis, MicroRNAs, Neck, Prognosis, Thyroid Cancer, Papillary, Thyroid Neoplasms, Up-Regulation, genetics, pathology	Nan fang yi ke da xue xue bao = Journal of Southern Medical University	36	chi	10	1364	1368		OBJECTIVE: To investigate the correlation of microRNA-155 (miR-155) expression with clinicopathological features of patients with papillary thyroid carcinoma (PTC) and explore the value of miR-155 in prognostic assessment of PTC. METHODS: We collected 86 pairs of fresh PTC and adjacent tissues to examine the expression of miR-155 using fluorescent quantitative PCR. miR-155 expressions in the tiss…			361
541	JOUR	Searching for non-RET molecular alterations in medullary thyroid carcinoma: expression analysis by mRNA differential display.	Musholt, Thomas J, Hanack, Julia, Brehm, Christoph, von Wasielewski, Reinhard, Musholt, Petra B	2005/04//	Adult, Aged, Annexin A2, Carcinoma, Medullary, DNA-Binding Proteins, Female, GTP-Binding Protein gamma Subunits, Gene Expression Profiling, Humans, Male, Middle Aged, Mucins, Muscle Proteins, Oncogene Proteins, Peptides, Proto-Oncogene Proteins c-ret, Receptor Protein-Tyrosine Kinases, Signal Transduction, Superoxide Dismutase, Superoxide Dismutase-1, Thyroid Neoplasms, Transcription, Genetic, Tr…	World journal of surgery	29	eng	4	472	482	10.1007/s00268-004-7748-y	Some 25%-70% of sporadic medullary thyroid carcinomas (MTCs) are associated with somatic mutations within the RET proto-oncogene. In a significant number of MTCs, however, no such genetic variations can be detected, which implies alternative pathogenic molecular alterations. To assess altered RET mutation-specific gene expression, and to identify yet unknown gene transcripts involved in the tumor…			362
646	JOUR	Absence of BRAF, NRAS, KRAS, HRAS mutations, and RET/PTC gene rearrangements distinguishes dominant nodules in Hashimoto thyroiditis from papillary thyroid carcinomas.	Sadow, Peter M, Heinrich, Michael C, Corless, Christopher L, Fletcher, Jonathan A, NosÃ©, VÃ¢nia	2010/06//	Adenocarcinoma, Papillary, Adult, Aged, Aged, 80 and over, Diagnosis, Differential, Female, Gene Rearrangement, Genotype, Hashimoto Disease, Humans, In Situ Hybridization, Fluorescence, Male, Middle Aged, Mutation, Patched Receptors, Proto-Oncogene Proteins, Proto-Oncogene Proteins B-raf, Proto-Oncogene Proteins c-ret, Proto-Oncogene Proteins p21(ras), Receptors, Cell Surface, Reverse Transcripta…	Endocrine pathology	21	eng	2	73	79	10.1007/s12022-009-9101-3	Dominant nodules within Hashimoto thyroiditis (HT) may present with unique morphological features that overlap with but are not diagnostic of papillary thyroid carcinoma (PTC). Activating BRAF point mutations, RAS aberrations, and RET rearrangements are mutually exclusive events in the oncogenesis of papillary thyroid carcinoma, and RET rearrangements have been previously described in dominant no…			363
546	JOUR	Berberine Attenuates NLRP3 Inflammasome Activation in Macrophages to Reduce the Secretion of Interleukin-1Î².	Jiang, Yugang, Huang, Kai, Lin, Xixia, Chen, Qinchang, Lin, Shaoyan, Feng, Xiaomin, Zhen, Chaohui, Huang, Min, Wang, Shenming	2017/11//	Adenosine Triphosphate, Berberine, Humans, Inflammasomes, Interleukin-1beta, Lipoproteins, LDL, Macrophages, NLR Family, Pyrin Domain-Containing 3 Protein, Reactive Oxygen Species, drug effects, metabolism, pharmacology	Annals of clinical and laboratory science	47	eng	6	720	728		OBJECTIVES: The purpose of this study is to evaluate whether Berberine can suppress the inflammatory response in atherosclerosis lesions and its potential associated signaling pathways and mechanism of action. METHODS: We isolated human peripheral blood mononuclear cells. After co-culturing them with ox-LDL stimulated cells, ROS was measured by its fluorescence intensity and NADPH oxidase activit…			364
10	JOUR	Hybrid Nanomaterials of Conjugated Polymers and Albumin for Precise Photothermal Therapy.	Zhang, Wei, Lin, Wenhai, Wang, Xin, Li, Chaonan, Liu, Shi, Xie, Zhigang	2019/01//	Boron Compounds, Cell Line, Tumor, Gold, Humans, Hyperthermia, Induced, Metal Nanoparticles, Nanotubes, Neoplasms, Photoacoustic Techniques, Phototherapy, Serum Albumin, Human, chemistry, metabolism, pathology, pharmacokinetics, pharmacology, therapeutic use, therapy	ACS applied materials & interfaces	11	eng	1	278	287	10.1021/acsami.8b17922	Heretofore, conjugated polymers (CPs) attract considerable attention in photothermal therapy (PTT). Although various CPs with different structures have been reported, the suboptimal circulation persistence and biodistribution limit their efficacy in tumor treatment. Human serum albumin (HSA), an endogenous plasma protein, has been widely functioned as a carrier for therapeutic agents. Herein, we …			365
409	JOUR	An immunocytochemical study of TSH beta storage in rat thyroidectomy cells with and without D or L thyroxine treatment.	Moriarty, G C, Tobin, R B	1976/11//	Animals, Fluorescent Antibody Technique, Male, Microscopy, Electron, Pituitary Gland, Rats, Receptors, Cell Surface, Stereoisomerism, Thyroidectomy, Thyrotropin, Thyroxine, drug effects, metabolism, pharmacology	The journal of histochemistry and cytochemistry : official journal of the Histochemistry Society	24	eng	11	1140	1149	10.1177/24.11.187688	Binding sites to the beta chain of thyroid stimulating hormone (TSH) were localized in pituitaries of thyroidectomized rats. Immunocytochemical staining was observed in hypertrophied TSH cells ("thyroidectomy cells") and primarily located in dilated rough endoplasmic reticulum. Staining was also found on the few secretory granules and on some of the intracisternal granules. Some of the thyroidect…			366
607	JOUR	ALK/EML4 fusion gene may be found in pure squamous carcinoma of the lung.	CaliÃ², Anna, Nottegar, Alessia, Gilioli, Eliana, Bria, Emilio, Pilotto, Sara, Peretti, Umberto, Kinspergher, Stefania, Simionato, Francesca, Pedron, Serena, Knuutila, Sakari, Tortora, Giampaolo, Eccher, Albino, Santo, Antonio, Tondulli, Luca, Inghirami, Giorgio, TabbÃ², Fabrizio, Martignoni, Guido, Chilosi, Marco, Scarpa, Aldo, Brunelli, Matteo	2014/05//	Aged, Aspartic Acid Endopeptidases, Carcinoma, Squamous Cell, Female, Humans, In Situ Hybridization, Fluorescence, Keratin-5, Keratin-6, Keratin-7, Lung Neoplasms, Male, Middle Aged, Nuclear Proteins, Oncogene Proteins, Fusion, SOXB1 Transcription Factors, Thyroid Nuclear Factor 1, Transcription Factors, Tumor Suppressor Proteins, analysis, chemistry, genetics, pathology	Journal of thoracic oncology : official publication of the International Association for the Study of Lung Cancer	9	eng	5	729	732	10.1097/JTO.0000000000000109	INTRODUCTION: The report of cases of lung squamous cell cancers harboring anaplastic lymphoma kinase (ALK) gene rearrangements raises the question whether this histologic subtype should be also evaluated for such molecular predictive test. METHODS: A consecutive series of 40 lung pure squamous cell carcinomas were analyzed for ALK gene status by fluorescence in situ hybridization. Squamous differ…			367
508	JOUR	Poly(cationic lipid)-mediated in vivo gene delivery to mouse liver.	Liu, L, Zern, M A, Lizarzaburu, M E, Nantz, M H, Wu, J	2003/01//	Animals, Cholesterol, Gene Targeting, Genes, Reporter, Genetic Vectors, Green Fluorescent Proteins, Hepatectomy, Injections, Intravenous, Lipids, Liposomes, Liver, Luciferases, Luminescent Proteins, Mice, Polyamines, Polyelectrolytes, Portal Vein, Thyroid Hormones, Transfection, administration & dosage, analysis, drug effects, genetics, metabolism, methods, pharmacology	Gene therapy	10	eng	2	180	187	10.1038/sj.gt.3301861	We have previously demonstrated that liposomes generated from poly(cationic lipid) (PCL) and cholesterol (Chol) have low cytotoxicity, are serum resistant, and display a transfection efficiency in vitro similar to commercially available cationic liposomes. Our in vivo experiments demonstrated that PCL-Chol liposomes bound much less avidly to serum proteins than did liposomes composed of 1,2-bis(d…			368
586	JOUR	Fabrication of Functional Cell Sheets with Human Thyrocytes from Non-Tumorous Thyroid Tissue.	Huang, Yu, Yamanouchi, Kosho, Sakai, Yusuke, Kuba, Sayaka, Sakimura, Chika, Morita, Michi, Kanetaka, Kengo, Takatsuki, Mitsuhisa, Eguchi, Susumu	2019/10//	Adolescent, Adult, Aged, Cell Proliferation, Cells, Cultured, Female, Fluorescent Antibody Technique, Humans, Keratin-7, Male, Middle Aged, Thyroglobulin, Thyroid Epithelial Cells, Thyroid Nuclear Factor 1, Thyroxine, Triiodothyronine, Young Adult, metabolism, physiology	Tissue engineering and regenerative medicine	16	eng	5	491	499	10.1007/s13770-019-00198-8	BACKGROUND: Engineered cell sheet transplantation has been considered an alternative physiological therapy for endocrine disorders. In this study, we attempted to fabricate functional human thyroid cell sheets using the engineering technology by culturing primary thyrocytes in free-feeder monolayers and assessed their proliferation and function in two different media. METHODS: The non-tumorous ti…			369
548	JOUR	Calcium sensing by human medullary thyroid carcinoma cells.	Ridefelt, P, Liu, Y J, Rastad, J, AkerstrÃ¶m, G, Gylfe, E	1994/01//	Calcium, Carcinoma, Medullary, Cerium, Humans, Lanthanum, Potassium, Signal Transduction, Spectrometry, Fluorescence, Thyroid Neoplasms, Tumor Cells, Cultured, Verapamil, metabolism, pharmacology	FEBS letters	337	eng	3	243	247	10.1016/0014-5793(94)80200-9	Regulation of the cytoplasmic calcium concentration ([Ca2+]i) was studied in fura-2-loaded C-cells from two human medullary thyroid carcinomas (MTC). K+ depolarization induced sustained rise of [Ca2+]i reversed by verapamil. Elevation of external Ca2+ from 0.5 to 3.0 mM triggered regular oscillations or steady-state increases of [Ca2+]i. In Ca(2+)-deficient medium Sr2+ caused steady-state increas…			370
401	JOUR	A non-autophagic pathway for diversion of ER secretory proteins to lysosomes.	Noda, T, Farquhar, M G	1992/10//	Acid Phosphatase, Animals, Cathepsin D, Endoplasmic Reticulum, Fluorescent Antibody Technique, Isomerases, Lysosomes, Microscopy, Immunoelectron, Pituitary Gland, Anterior, Protein Disulfide-Isomerases, Rats, Rats, Inbred Strains, Thymectomy, Thyrotropin, metabolism, ultrastructure	The Journal of cell biology	119	eng	1	85	97	10.1083/jcb.119.1.85	Intracisternal granules (ICG) develop in the rough ER of hyperstimulated thyrotrophs or thyroid hormone-secreting cells of the anterior pituitary gland. To determine the fate of these granules, we carried out morphological and immunocytochemical studies on pituitaries of thyroxine-treated, thyroidectomized rats. Under these conditions the ER of thyrotrophs is dramatically dilated and contains abu…			371
459	JOUR	Autolymphocytotoxins following immunization by pregnancy, transplantation, and disease.	Naito, S, Mickey, M R, Hirata, A, Terasaki, P I	1971///	Antibody Formation, Antibody Specificity, Autoantibodies, Cold Temperature, Cytotoxicity Tests, Immunologic, Female, Fluorescent Antibody Technique, Graves Disease, Histocompatibility Antigens, Humans, Immunization, Immunoglobulin M, Kidney Transplantation, Lymphocytes, Male, Parity, Pregnancy, Rheumatic Heart Disease, Thyroiditis, Autoimmune, immunology	Tissue antigens	1	eng	5	219	228	10.1111/j.1399-0039.1971.tb00099.x				372
340	JOUR	A modular gain-of-function approach to generate cortical interneuron subtypes from ES cells.	Au, Edmund, Ahmed, Tanzeel, Karayannis, Theofanis, Biswas, Shiona, Gan, Lin, Fishell, Gord	2013/12//	Action Potentials, Animals, Animals, Newborn, Cell Differentiation, Cell Lineage, Cerebral Cortex, Embryo, Mammalian, Embryonic Stem Cells, Gene Expression Regulation, Developmental, Green Fluorescent Proteins, Homeodomain Proteins, In Vitro Techniques, Interneurons, LIM Domain Proteins, Mice, Mice, Transgenic, Nerve Tissue Proteins, Nuclear Proteins, Patch-Clamp Techniques, Stem Cell Transplanta…	Neuron	80	eng	5	1145	1158	10.1016/j.neuron.2013.09.022	Whereas past work indicates that cortical interneurons (cINs) can be generically produced from stem cells, generating large numbers of specific subtypes of this population has remained elusive. This reflects an information gap in our understanding of the transcriptional programs required for different interneuron subtypes. Here, we have utilized the directed differentiation of stem cells into spe…			373
467	JOUR	Hypophyseal changes induced by thyroid deficiency and thyroxine administration as revealed by immunochemical staining.	Baker, B L, Yu, Y Y	1971/10//	Animals, Castration, Female, Fluorescent Antibody Technique, Hypothyroidism, Luteinizing Hormone, Pituitary Gland, Propylthiouracil, Rats, Thyroidectomy, Thyrotropin, Thyroxine, analysis, cytology, pathology, pharmacology	Endocrinology	89	eng	4	996	1004	10.1210/endo-89-4-996				374
596	JOUR	Endothelial progenitor cells homing to the orthotopic implanted liver tumor of nude mice.	Zhu, Zhi, Chen, Gang, Li, Xingrui, Yin, Qian, Yang, Zhifang, Yi, Jilin	2012/10//	Animals, Endothelial Cells, Liver Neoplasms, Mice, Mice, Inbred C57BL, Mice, Nude, Stem Cells, pathology	Journal of Huazhong University of Science and Technology. Medical sciences = Hua zhong ke ji da xue xue bao. Yi xue Ying De wen ban = Huazhong keji daxue xuebao. Yixue Yingdewen ban	32	eng	5	675	679	10.1007/s11596-012-1016-4	This study investigated the "homing" phenomenon in hepatocellular carcinoma (HCC). The "homing" specificity of endothelial progenitor cells (EPC) by establishing an orthotopic implantation model in nude mice. EPCs harvested from the marrow cells were separated by density gradient centrifugation. Fluorescence microscope, flow cytometry (FCM) and double fluorescence staining with FITC-UEA-I and DiI…			375
417	JOUR	Immunofluorescence of cutaneous vasculitis associated with systemic disease.	Schroeter, A L, Copeman, P W, Jordon, R E, Sams, W M Jr, Winkelmann, R K	1971/09//	Anemia, Hemolytic, Antigen-Antibody Complex, Arthritis, Rheumatoid, Biopsy, Blood Protein Disorders, Colitis, Ulcerative, Complement System Proteins, Cryoglobulins, Drug Hypersensitivity, Face, Fluorescent Antibody Technique, Granuloma, Hodgkin Disease, Humans, Hypersensitivity, Immediate, Immunoglobulin A, Immunoglobulin G, Immunoglobulins, Liver Diseases, Lupus Erythematosus, Systemic, Myxedema…	Archives of dermatology	104	eng	3	254	259					376
701	JOUR	Interleukin-12p35 deficiency enhances mitochondrial dysfunction and aggravates cardiac remodeling in aging mice.	Ye, Jing, Wang, Yuan, Wang, Zhen, Liu, Ling, Yang, Zicong, Ye, Di, Wang, Menglong, Xu, Yao, Zhang, Jishou, Zhao, Mengmeng, Liu, Jianfang, Lin, Yingzhong, Ji, Qingwei, Wan, Jun	2020/01//	Age Factors, Aging, Animals, Apoptosis, Apoptosis Regulatory Proteins, Cellular Senescence, Interleukin-12 Subunit p35, Mice, Mice, Knockout, Mitochondria, Mitochondria, Heart, Myocytes, Cardiac, Ventricular Remodeling, deficiency, genetics, metabolism	Aging	12	eng	1	193	203	10.18632/aging.102609	Our previous studies have demonstrated that interleukin-12p35 knockout (IL-12p35 KO) regulates the progression of various cardiovascular diseases, such as acute cardiac injury and hypertension. The aims of this study were to investigate whether IL-12p35 KO affects aging-related cardiac remodeling and to explore the possible mechanisms. First, the effects of IL-12p35 KO on heart structure and func…			377
339	JOUR	Transfer of experimental autoimmune thyroiditis by serum from thyroidectomized donors.	Nakamura, R M, Weigle, W O	1969/08//	Animals, Antibodies, Antibody Formation, Antigens, Arthus Reaction, Autoimmune Diseases, Fluorescent Antibody Technique, Freund's Adjuvant, Guinea Pigs, Hypersensitivity, Delayed, Immune Sera, Immunoelectrophoresis, Mycobacterium, Rabbits, Thyroglobulin, Thyroidectomy, Thyroiditis, analysis, etiology, immunology, pathology	The Journal of experimental medicine	130	eng	2	263	285	10.1084/jem.130.2.263	When rabbits were injected with 10.0 mg rabbit thyroglobulin in complete Freund's adjuvant, the earliest thyroid lesions were seen on day 5 and uniformly severe thyroid lesions were seen by day 14; these observations were not significantly different from the thyroid lesions observed at 1 and 2 months post-immunization. Pooled sera were obtained from immunized, thyroidectomized, and nonthyroidecto…			378
482	JOUR	Study of the effect of TRH on the serotonin catecholaminergic thyroid regulation.	SzÃ¡ntÃ³, L, DonÃ¡th, T, Reviczky, A, Tanka, D, Keller, M, Nagy, G	1980///	Animals, Histocytochemistry, Hypophysectomy, Male, Methysergide, Rats, Serotonin, Thyroid Gland, Thyrotropin-Releasing Hormone, Thyroxine, blood, cytology, drug effects, pharmacology, physiology	Acta medica Academiae Scientiarum Hungaricae	37	eng	1	25	38		From complex biochemical, fluorescence-microscopic and enzyme-histochemical studies of the thyroid in rats it is concluded that the thyroid exerts, in addition to its catecholaminergic stimulatory effect, a serotonin-inhibiting regulatory activity, subject to the stimulatory effect of TRH.			379
689	JOUR	PAX8-GLIS3 gene fusion is a pathognomonic genetic alteration of hyalinizing trabecular tumors of the thyroid.	MarchiÃ², Caterina, Da Cruz Paula, Arnaud, Gularte-Merida, Rodrigo, Basili, Thais, Brandes, Alissa, da Silva, Edaise M, Silveira, Catarina, Ferrando, Lorenzo, Metovic, Jasna, Maletta, Francesca, Annaratone, Laura, Pareja, Fresia, Rubin, Brian P, Hoschar, Aaron P, De Rosa, Giovanni, La Rosa, Stefano, Bongiovanni, Massimo, Purgina, Bibianna, Piana, Simonetta, Volante, Marco, Weigelt, Britta, Reis-F…	2019/12//	DNA-Binding Proteins, Humans, Oncogene Proteins, Fusion, PAX8 Transcription Factor, Repressor Proteins, Thyroid Neoplasms, Trans-Activators, genetics, pathology	Modern pathology : an official journal of the United States and Canadian Academy of Pathology, Inc	32	eng	12	1734	1743	10.1038/s41379-019-0313-x	The hyalinizing trabecular adenoma/tumor is a rare and poorly characterized follicular-derived thyroid neoplasm recently shown to harbor recurrent PAX8-GLIS1 or PAX8-GLIS3 gene fusions. Here we sought to define the repertoire of genetic alterations of hyalinizing trabecular tumors, and whether PAX8-GLIS3 fusions are pathognomonic for hyalinizing trabecular tumors. A discovery series of eight hyal…			380
703	JOUR	Effects of ulinastatin and cyclophosphamide on the growth of xenograft breast cancer and expression of CXC chemokine receptor 4 and matrix metalloproteinase-9 in cancers.	Sun, Z J, Yu, T, Chen, J S, Sun, X, Gao, F, Zhao, X L, Luo, J	2010///	Animals, Antineoplastic Agents, Alkylating, Biomarkers, Tumor, Breast Neoplasms, Cell Line, Tumor, Cyclophosphamide, Dose-Response Relationship, Drug, Drug Therapy, Combination, Female, Fluorescent Antibody Technique, Indirect, Gene Expression, Gene Expression Regulation, Neoplastic, Glycoproteins, Humans, Immunoenzyme Techniques, Matrix Metalloproteinase 9, Mice, Mice, Nude, Receptors, CXCR4, Tr…	The Journal of international medical research	38	eng	3	967	976	10.1177/147323001003800323	The aim of this study was to evaluate the effects of ulinastatin (UTI) and cyclophosphamide (CTX) as mono therapies and as combination therapy on the growth of mouse xenograft breast tumours. MCF-7 breast cancer cells were xenografted into 48 nu/nu nude mice in order to construct a breast cancer xenograft nude mouse model; mice were then untreated (control), or treated with CTX 0.1 g/kg every oth…			381
579	JOUR	Influence of thyroid hormone on the development of peoptic-hypothalamic monoaminergic neurons in tadpoles of Bufo bufo japonicus.	Kikuyama, S, Miyakawa, M, Arai, Y	1979/04//	Animals, Bufo bufo, Catecholamines, Cell Differentiation, Hypothalamus, Larva, Metamorphosis, Biological, Neurons, Pituitary Gland, Preoptic Area, Thyroid Gland, Thyroxine, cytology, drug effects, growth & development, metabolism, pharmacology, physiology	Cell and tissue research	198	eng	1	27	33	10.1007/BF00234831	The effect of thyroid hormone on the development of diencephalic monoaminergic neurons was studied in tadpoles of Bufo bufo japonicus. Monoamine-containing neurons in the preoptic recess organ (PRO) appeared later than those in the paraventricular organ (PVO) and nucleus infundibularis dorsalis (NID). After deprivation of thyroidal primordium no fluorescent neurons developed in the PRO. Developme…			382
700	JOUR	Thyroid hormone dependency of the developing dorsal raphe nucleus but not the superior cervical ganglion. Evidence from intraocular grafting experiments.	Granholm, A C, Siegel, R A, Seiger, A	1984///		International journal of developmental neuroscience : the official journal of the International Society for Developmental Neuroscience	2	eng	4	337	345	10.1016/0736-5748(84)90070-4	Immature superior cervical ganglia and brain stem pieces containing 5-hydroxytryptamine neurons of the dorsal raphe nucleus were grafted to the anterior eye chamber of intact and thyroidectomized recipients. The grafts were left in the eye to mature for 4-6 weeks and were measured through the translucent cornea repeatedly to follow survival and growth. Monoaminergic nerve fibre outgrowth from the…			383
435	JOUR	Thyroxin dependency of the developing locus coeruleus. Evidence from intraocular grafting experiments.	Seiger, A, Granholm, A C	1981///	Animals, Axons, Female, Iris, Locus Coeruleus, Male, Nerve Fibers, Norepinephrine, Rats, Rats, Inbred Strains, Thyroidectomy, Thyroxine, cytology, growth & development, innervation, physiology, transplantation, ultrastructure	Cell and tissue research	220	eng	1	1	15	10.1007/BF00209961	Surgical thyroidectomies were used as means of altering the thyroid state of adult recipients to study the possible influence of thyroid hormones on fibre formation in irides by immature noradrenaline neurons of the locus coeruleus grafted to the eye. Whole-mount preparations of irides were analysed using fluorescence histochemistry according to Falck-Hillarp, subjectively estimating on a 'blind'…			384
647	JOUR	HSPA8 as a novel fusion partner of NR4A3 in extraskeletal myxoid chondrosarcoma.	Urbini, Milena, Astolfi, Annalisa, Pantaleo, Maria Abbondanza, Serravalle, Salvatore, Dei Tos, Angelo Paolo, Picci, Piero, Indio, Valentina, Sbaraglia, Marta, Benini, Stefania, Righi, Alberto, Gambarotti, Marco, Gronchi, Alessandro, Colombo, Chiara, Dagrada, Gian Paolo, Pilotti, Silvana, Maestro, Roberta, Polano, Maurizio, Saponara, Maristella, Tarantino, Giuseppe, Pession, Andrea, Biasco, Guido,…	2017/07//	Chondrosarcoma, DNA-Binding Proteins, Female, Groin, HSC70 Heat-Shock Proteins, Humans, In Situ Hybridization, Fluorescence, Middle Aged, Neoplasms, Connective and Soft Tissue, Oncogene Proteins, Fusion, Receptors, Steroid, Receptors, Thyroid Hormone, Tomography, X-Ray Computed, diagnostic imaging, genetics, pathology	Genes, chromosomes & cancer	56	eng	7	582	586	10.1002/gcc.22462	Extraskeletal myxoid chondrosarcoma (EMC) is a very rare sarcoma most often arising in the soft tissue. Rare EMC of the bone have been reported. EMC exhibits distinctive clinico-pathological and genetic features; however, despite the name, it lacks any feature of cartilaginous differentiation. EMC is characterized by the rearrangement of the NR4A3, which, in most cases (about 62-75%), is fused wi…			385
702	JOUR	Ewing's sarcoma of the cervix: A case report and review of literature.	Zhang, Yangyang, Nong, Weixia, Ren, Yan, Jiang, Jinfang, Zhang, Haijun, Meng, Lian, Li, Qianru, Zhang, Qiaochu, Wang, Xiaomeng, Wang, Yang, Liu, Chunxia, Li, Feng	2020/05//	Aged, Bone Neoplasms, Cervix Uteri, Female, Humans, Immunohistochemistry, Neoplasm Metastasis, Oncogene Proteins, Fusion, Proto-Oncogene Protein c-fli-1, RNA-Binding Protein EWS, Reverse Transcriptase Polymerase Chain Reaction, Sarcoma, Ewing, diagnosis, genetics, pathology, surgery	Histology and histopathology	35	eng	5	475	480	10.14670/HH-18-181	Ewing's sarcoma (ES) is a small cell malignant tumor that occurs in the bone of children or adolescents. ES can also occur in extraskeletal organs, such as the pancreas, thyroid, liver, proximal phalanx, and, rarely, cervix. Only 15 published case reports have discussed ES arising in the cervix. We report a 76-year-old woman who had groin mass. ES was diagnosed in accordance with morphological an…			386
629	JOUR	Profiling of Oncogenic Driver Events in Lung Adenocarcinoma Revealed MET Mutation as Independent Prognostic Factor.	Yeung, Sai F, Tong, Joanna H M, Law, Peggy P W, Chung, Lau Y, Lung, Raymond W M, Tong, Carol Y K, Chow, Chit, Chan, Anthony W H, Wan, Innes Y P, Mok, Tony S K, To, Ka F	2015/09//	Adenocarcinoma, Adenocarcinoma of Lung, Adult, Aged, Aged, 80 and over, Cohort Studies, Female, Humans, In Situ Hybridization, Fluorescence, Lung Neoplasms, Male, Middle Aged, Prognosis, Proto-Oncogene Proteins c-met, Retrospective Studies, genetics, metabolism, methods	Journal of thoracic oncology : official publication of the International Association for the Study of Lung Cancer	10	eng	9	1292	1300	10.1097/JTO.0000000000000620	INTRODUCTION: Oncogenic driver mutations activating receptor tyrosine kinase pathways are promising predictive markers for targeted treatment. We investigated the mutation profile of an updated driver events list on receptor tyrosine kinase/RAS/PI3K axis and the clinicopathologic implications in a cohort of never-smoker predominated Chinese lung adenocarcinoma. METHODS: We tested 154 lung adenoca…			387
558	JOUR	Intrathyroidal activated (Ia+) T-lymphocyte CD+ subsets and B cells in Graves' hyperthyroidism respond rapidly to propylthiouracil therapy: demonstration using fine needle aspirates and two-colour laser flow cytometry.	Walfish, P G, Tseng, K H	1992///	Adolescent, Adult, B-Lymphocytes, Biopsy, Needle, Female, Flow Cytometry, Graves Disease, Histocompatibility Antigens Class II, Humans, Lymphocyte Activation, Male, Middle Aged, Propylthiouracil, T-Lymphocyte Subsets, analysis, drug therapy, immunology, therapeutic use	Autoimmunity	13	eng	1	35	41	10.3109/08916939209014633	Using a rapid (whole blood lysis) single laser microfluorocytometric technique that permitted the simultaneous analysis of two monoclonal antibody surface markers tagged with different fluorescent dyes, the intrathyroidal (IT) and peripheral blood (PB) activated [Ia+ = DR+] T-lymphocyte CD3+ subsets and [F(ab')2+] B cells were studied in hyperthyroid patients with Graves' disease (GD) before and …			388
310	JOUR	[Association between BRAF V600E mutation and central lymph node metastasis in patients with papillary thyroid carcinoma].	Shi, Chenlei, Qin, Huadong, Ding, Chao, Sun, Yu, Lyu, Yichen, Shi, Tiefeng	2015/02//	Carcinoma, Carcinoma, Papillary, Hashimoto Disease, Humans, Lymph Node Excision, Lymph Nodes, Lymphatic Metastasis, Mutation, Polymerase Chain Reaction, Proto-Oncogene Proteins B-raf, Retrospective Studies, Thyroid Cancer, Papillary, Thyroid Neoplasms, diagnosis, epidemiology, genetics, metabolism	Zhonghua zhong liu za zhi [Chinese journal of oncology]	37	chi	2	123	127		OBJECTIVE: To investigate the association of concomitant BRAFV600E mutation with central lymph node metastases in papillary thyroid carcinoma (PTC). METHODS: The clinicopathological data of 126 PTC patients who underwent surgical treatment within a period of 2 years were retrospectively analyzed. The BRAF V600E gene mutation was detected by quantitative fluorescence PCR. RESULTS: The BRAF mutatio…			389
444	JOUR	Auto-antibodies of the IgD class.	Kantor, G L, Van Herle, A J, Barnett, E V	1970/06//	Antibodies, Antinuclear, Autoantibodies, Autoimmune Diseases, Chronic Disease, Fluorescent Antibody Technique, Glomerulonephritis, Humans, Immunoglobulin G, Immunoglobulins, Kidney Glomerulus, Kidney Transplantation, Lupus Erythematosus, Systemic, Nephritis, Nephritis, Interstitial, Thyroid Gland, analysis, immunology	Clinical and experimental immunology	6	eng	6	951	962		Utilizing immunofluorescent techniques, antinuclear and antithyroid antibodies were demonstrated within the IgD class of immunoglobulins. Glomerular deposits of IgD were detected in three kidneys with glomerulonephritis and one renal allograft. Similar deposits were not present in four kidneys with respective diagnosis of interstitial nephritis, lupus nephritis, chronic glomerulonephritis, and fo…			390
391	JOUR	Ectopic thymus presenting as a thyroid nodule in a patient with the Carney complex.	Courcoutsakis, Nickolas, Patronas, Nickolas, Filie, Armando C, Carney, J Aidan, Moraitis, Andreas, Stratakis, Constantine A	2009/03//	Adenoma, Oxyphilic, Child, Choristoma, Cyclic AMP-Dependent Protein Kinase RIalpha Subunit, DNA, Diagnosis, Differential, Humans, In Situ Hybridization, Fluorescence, Lentigo, Male, Multiple Endocrine Neoplasia, Pigmentation Disorders, Syndrome, Thymus Gland, Thyroid Nodule, Thyroidectomy, biosynthesis, complications, genetics, pathology	Thyroid : official journal of the American Thyroid Association	19	eng	3	293	296	10.1089/thy.2008.0404	Ectopic thymic tissue within the thyroid gland is rare. Patients with a complex of myxomas, spotty skin pigmentation, and endocrine overactivity, collectively known as Carney complex (CNC), have a predisposition towards the development of thyroid abnormalities, but there are no reports of thymic defects in CNC. We present the case of a 12-year-old boy with CNC and a growing thyroid nodule. The pa…			391
715	JOUR	MicroRNA-125b Affects Vascular Smooth Muscle Cell Function by Targeting Serum Response Factor.	Chen, Zhibo, Wang, Mian, Huang, Kai, He, Qiong, Li, Honghao, Chang, Guangqi	2018///	3' Untranslated Regions, Adult, Aged, Animals, Antagomirs, Apoptosis, Arteriosclerosis Obliterans, Base Sequence, Becaplermin, Carotid Artery Injuries, Cell Movement, Cell Proliferation, Cells, Cultured, Down-Regulation, Female, Humans, In Situ Hybridization, Fluorescence, Male, MicroRNAs, Middle Aged, Muscle, Smooth, Vascular, Proto-Oncogene Proteins c-sis, Rats, Rats, Sprague-Dawley, Sequence A…	Cellular physiology and biochemistry : international journal of experimental cellular physiology, biochemistry, and pharmacology	46	eng	4	1566	1580	10.1159/000489203	BACKGROUND/AIMS: Increasing evidence links microRNAs to the pathogenesis of peripheral vascular disease. We recently found microRNA-125b (miR-125b) to be one of the most significantly downâregulated microRNAs in human arteries with arteriosclerosis obliterans (ASO) of the lower extremities. However, its function in the process of ASO remains unclear. This study aimed to investigate the expressi…			392
604	JOUR	Differential effects of thyroxine and cortisone on jejunal sucrase expression in suckling rats.	Yeh, K Y, Yeh, M, Holt, P R	1989/03//	Adrenalectomy, Aging, Animals, Cortisone, Enzyme Induction, Fluorescent Antibody Technique, Jejunum, Lactates, Multienzyme Complexes, Muscle Development, Muscle, Smooth, Rats, Rats, Inbred Strains, Reference Values, Sucrase, Sucrase-Isomaltase Complex, Thyroxine, biosynthesis, drug effects, enzymology, growth & development, pharmacology	The American journal of physiology	256	eng	3 Pt 1	G604	12	10.1152/ajpgi.1989.256.3.G604	Effects of thyroxine (T4) and cortisone (C) on developmental expression of jejunal immunoreactive sucrase-isomaltase (S-I) and sucrase activity in suckling rats were studied to determine whether these hormones have distinctive actions. Immunoreactive S-I and sucrase activity were absent in infant rats and appeared simultaneously on days 16-18, when cells expressing S-I protein were detected at th…			393
121	JOUR	Photodynamic therapy enables tumor-specific ablation in preclinical models of thyroid cancer.	Muhanna, Nidal, Chan, Harley H L, Townson, Jason L, Jin, Cheng S, Ding, Lili, Valic, Michael S, Douglas, Catriona M, MacLaughlin, Christina M, Chen, Juan, Zheng, Gang, Irish, Jonathan C	2020/02//		Endocrine-related cancer	27	eng	2	41	53	10.1530/ERC-19-0258	The incidence of differentiated thyroid cancer has increased significantly during the last several decades. Surgical resection is the primary treatment for thyroid cancer and is highly effective, resulting in 5-year survival rates greater than 98%. However, surgical resection can result in short- and long-term treatment-related morbidities. Additionally, as this malignancy often affects women les…			394
598	JOUR	Molecular cytogenetic profiles of novel and established human anaplastic thyroid carcinoma models.	Lee, Jia-Jing, Foukakis, Theodoros, Hashemi, Jamileh, Grimelius, Lars, Heldin, Nils-Erik, Wallin, GÃ¶ran, Rudduck, Christina, Lui, Weng-Onn, HÃ¶Ã¶g, Anders, Larsson, Catharina	2007/04//	Aged, Aged, 80 and over, Carcinoma, Cell Line, Tumor, Chromosome Aberrations, Chromosomes, Human, Female, Gene Amplification, Gene Expression Regulation, Neoplastic, Humans, Male, Microarray Analysis, Nucleic Acid Hybridization, PTEN Phosphohydrolase, Proto-Oncogene Proteins B-raf, Spectral Karyotyping, Thyroid Neoplasms, Ubiquitin-Conjugating Enzymes, classification, genetics, pathology	Thyroid : official journal of the American Thyroid Association	17	eng	4	289	301	10.1089/thy.2006.0246	In this study we present two novel anaplastic thyroid carcinoma (ATC) lines (HTh 104 and HTh 112) and further characterize six frequently used ATC lines (HTh 7, HTh 74, HTh 83, C 643, KAT-4, and SW 1736). Three of the lines carried a heterozygous BRAF mutation V600E, which is in line with reports of BRAF mutations in primary ATC and papillary thyroid cancer. Several nonrandom breakpoints were ide…			395
624	JOUR	Expression of miR-100 and RBSP3 in FTC-133 cells after exposure to 131I.	Zhang, Shining, Deng, Baoping, Zhang, Yuanyuan, Jiang, Ningyi	2014/09//	Adult, Cell Line, Tumor, Cell Proliferation, Dose-Response Relationship, Radiation, Gene Expression Regulation, Neoplastic, Humans, Iodine Radioisotopes, Male, MicroRNAs, Radiation Dosage, Radiopharmaceuticals, Thyroid Neoplasms, Tumor Suppressor Proteins, administration & dosage, genetics, metabolism, pathology, radiation effects	Nuclear medicine communications	35	eng	9	932	938	10.1097/MNM.0000000000000142	BACKGROUND: Sodium iodide ((131)I) therapy for the management of differentiated thyroid cancer is based on the deposition of certain doses of ionizing radiation, which can modulate microRNA (miRNA, miR) expression. Recent studies have suggested that miR-100 is significantly differentially expressed between benign and malignant thyroid tissue samples and modulates retinoblastoma 1 serine phosphate…			396
123	JOUR	Adamantinoma-Like Ewing Sarcoma of the Thyroid: A Case Report and Review of the Literature.	Morlote, Diana, Harada, Shuko, Lindeman, Brenessa, Stevens, Todd M	2019/12//	Adamantinoma, Female, Humans, Oncogene Proteins, Fusion, Sarcoma, Ewing, Thyroid Neoplasms, Young Adult, genetics, pathology	Head and neck pathology	13	eng	4	618	623	10.1007/s12105-019-01021-5	Currently considered a variant of Ewing sarcoma, adamantinoma-like Ewing sarcoma is a rare malignancy that shows classic Ewing sarcoma-associated gene fusions but also epithelial differentiation. Here we present the 6th reported case of adamantinoma-like Ewing sarcoma involving the thyroid gland. Sections of the thyroid tumor from a 20-year old woman showed sheets, lobules and trabeculae of primi…			397
177	JOUR	An Adult Mouse Thyroid Side Population Cell Line that Exhibits Enriched Epithelial-Mesenchymal Transition.	Murata, Tsubasa, Iwadate, Manabu, Takizawa, Yoshinori, Miyakoshi, Masaaki, Hayase, Suguru, Yang, Wenjing, Cai, Yan, Yokoyama, Shigetoshi, Nagashima, Kunio, Wakabayashi, Yoshiyuki, Zhu, Jun, Kimura, Shioko	2017/03//	Animals, Blotting, Western, Cell Culture Techniques, Cell Differentiation, Cell Line, Epithelial-Mesenchymal Transition, Fluorescent Antibody Technique, Gene Expression, Immunohistochemistry, Mice, Reverse Transcriptase Polymerase Chain Reaction, Sequence Analysis, RNA, Side-Population Cells, Stem Cell Transplantation, Stem Cells, Thyroid Carcinoma, Anaplastic, Thyroid Gland, Thyroid Neoplasms, T…	Thyroid : official journal of the American Thyroid Association	27	eng	3	460	474	10.1089/thy.2016.0130	BACKGROUND: Studies of thyroid stem/progenitor cells have been hampered due to the small organ size and lack of tissue, which limits the yield of these cells. A continuous source that allows the study and characterization of thyroid stem/progenitor cells is desired to push the field forward. METHOD: A cell line was established from Hoechst-resistant side population cells derived from mouse thyroi…			398
480	JOUR	Familial supernumerary chromosome and malignancy.	Milunsky, J M, Wyandt, H E, Milunsky, A	1996/07//	Adult, Amniocentesis, Chromosome Aberrations, Chromosomes, Human, Pair 15, Female, Genetic Markers, Glioma, Humans, In Situ Hybridization, Fluorescence, Leukemia, Male, Neoplasms, Pedigree, Thyroid Neoplasms, genetics	Cancer genetics and cytogenetics	89	eng	2	170	172	10.1016/0165-4608(96)00069-6	No familial marker chromosome associated with a malignancy has been reported to date. We used fluorescence in situ hybridization (FISH) to characterize a supernumerary marker chromosome 15 ascertained during prenatal diagnosis. This supernumerary chromosome 15 was found to span three generations of a family. Three family members carrying the supernumerary chromosome 15 have also had malignancies,…			399
636	JOUR	RET rearrangements in lung adenocarcinoma and radiation.	Dacic, Sanja, Luvison, Alyssa, Evdokimova, Viktoria, Kelly, Lindsey, Siegfried, Jill M, Villaruz, Liza C, Socinski, Mark A, Nikiforov, Yuri E	2014/01//	Adenocarcinoma, Adenocarcinoma of Lung, Female, Gamma Rays, Gene Fusion, Gene Rearrangement, Humans, In Situ Hybridization, Fluorescence, Lung, Lung Neoplasms, Male, Neoplasms, Radiation-Induced, Proto-Oncogene Proteins c-ret, etiology, genetics, metabolism, radiation effects	Journal of thoracic oncology : official publication of the International Association for the Study of Lung Cancer	9	eng	1	118	120	10.1097/JTO.0000000000000015	BACKGROUND: RET rearrangement, a hallmark of radiation-induced thyroid cancer, has been reported to occur in 1% of lung adenocarcinoma patients. Patients with this rearrangement tend to be younger and never smokers, raising a possibility of other causes, such as radiation. We hypothesized that RET chromosomal rearrangement may represent a genetic mechanism of radiation-induced lung cancer. METHOD…			400
686	GEN	Pembrolizumab plus platinum-based chemotherapy for unfavorable cancer of unknown primary site: Case report.	Kamada, Teppei, Ishiguro, Hiroshi, Okada, Shinya, Takeuchi, Hideyuki, Takahashi, Junji, Nakashima, Keigo, Nakaseko, Yuichi, Suzuki, Norihiko, Ohdaira, Hironori, Suzuki, Yutaka	2020/12//		Annals of medicine and surgery (2012)	60	eng		31	35	10.1016/j.amsu.2020.10.024	INTRODUCTION: We report a case of sustained complete response in unfavorable cancer of unknown primary site (CUP) successfully treated with chemotherapy combining pembrolizumab, pemetrexed and platinum. CASE PRESENTATION: A 66-year-old man was presented with weight loss and cough for 3 months. Contrast-enhanced computed tomography (CT) confirmed a mass in the superior anterior mediastinum and mul…			401
682	JOUR	Insulin enhances apoptosis induced by cisplatin in human esophageal squamous cell carcinoma EC9706 cells related to inhibition of autophagy.	Yang, Yang, Wen, Fengbiao, Dang, Lifeng, Fan, Yuxia, Liu, Donglei, Wu, Kai, Zhao, Song	2014///	Apoptosis, Autophagy, Carcinoma, Squamous Cell, Cell Line, Tumor, Cell Survival, Cisplatin, Esophageal Neoplasms, Esophageal Squamous Cell Carcinoma, Humans, Phosphatidylinositol 3-Kinases, Proto-Oncogene Proteins c-akt, Signal Transduction, drug effects, metabolism, pharmacology	Chinese medical journal	127	eng	2	353	358		BACKGROUND: Chemoresistance is common among patients with esophageal squamous cell carcinoma (ESCC). We investigated the effect and mechanism of insulin on enhancing anticancer functions of cisplatin in human esophageal cancer cell line EC9706. METHODS: The viability of EC9706 cells exposed to cisplatin was assessed using MTT assay. The times T1, when the number of living cells reached a plateau …			402
462	JOUR	[Effects of gamma-irradiation and thyro-parathyroidectomy on structural-functional state of membranes of sarcoplasmic reticulum of skeletal muscle].	Shafranovskaia, E V	2002///	Animals, Calcium, Fluorescence, Gamma Rays, In Vitro Techniques, Magnesium, Membrane Lipids, Parathyroidectomy, Pyrenes, Radiation Dosage, Radiation, Ionizing, Rats, Sarcoplasmic Reticulum, Thyroidectomy, Time Factors, Tryptophan, metabolism, pharmacology, physiology, radiation effects, ultrastructure	Radiatsionnaia biologiia, radioecologiia	42	rus	1	44	47		It has been found that the combined effect of the acute gamma-irradiation with 1 Gy dose and thyroparathyroidectomy (TPTE) changes the structure-functional state of SR membranes of rat skeletal muscles conditioned by the disturbance of hormonal regulation of molecular-cellular mechanisms of calcium exchange.			403
446	JOUR	[Fine-needle aspiration biopsy in the diagnosis of thyroid diseases].	KrÅ­stev, I, Terzieva, Ts, Dobrev, D, Topov, Ia, Popov, A	1988///	Biopsy, Needle, Diagnosis, Differential, Humans, Immunohistochemistry, Lymphocytes, Microscopy, Fluorescence, Thyroid Diseases, Thyroid Gland, diagnosis, metabolism, pathology	Vutreshni bolesti	27	bul	4	10	14		On 105 patients with thyroid gland diseases thin needle aspiration biopsy was performed. The cytologic examinations proved to be of great importance for the diagnosis of thyroiditis and thyroid cancer. When lymphoid cells were found immunocytochemical examination was made additionally. It allows the differentiation of the subacute thyroiditis from the chronic and recurrent thyroiditis. The thin n…			404
576	JOUR	Papillary carcinoma of the breast lacks evidence of RET rearrangements despite morphological similarities to papillary thyroid carcinoma.	Hameed, Omar, Perry, Arie, Banerjee, Ruma, Zhu, Xiaopei, Pfeifer, John D	2009/09//	Adult, Aged, Aged, 80 and over, Breast Neoplasms, Breast Neoplasms, Male, Carcinoma, Papillary, DNA-Binding Proteins, Female, Gene Rearrangement, Humans, In Situ Hybridization, Fluorescence, Male, Middle Aged, Nuclear Proteins, Oncogene Proteins, Fusion, Reverse Transcriptase Polymerase Chain Reaction, Thyroid Neoplasms, genetics, pathology	Modern pathology : an official journal of the United States and Canadian Academy of Pathology, Inc	22	eng	9	1236	1242	10.1038/modpathol.2009.91	Rare breast neoplasms resembling the tall-cell variant of papillary thyroid carcinoma have been reported. In addition, papillary carcinoma of the breast occasionally displays nuclear features reminiscent of papillary thyroid carcinoma. In this study, we evaluated 33 intraductal/intracystic papillary carcinomas of the breast for the presence and extent of nuclear overlap, grooves, clearing, and in…			405
246	JOUR	Relaxin enhances the collagenolytic activity and in vitro invasiveness by upregulating matrix metalloproteinases in human thyroid carcinoma cells.	Bialek, Joanna, Kunanuvat, Usakorn, Hombach-Klonisch, Sabine, Spens, Antje, Stetefeld, Joerg, Sunley, Kevin, Lippert, Dustin, Wilkins, John A, Hoang-Vu, Cuong, Klonisch, Thomas	2011/06//	Adolescent, Adult, Aged, Aged, 80 and over, Cell Line, Tumor, Cell Movement, Child, Collagen, Down-Regulation, Female, Gene Expression Regulation, Neoplastic, Goiter, Humans, Male, Matrix Metalloproteinase 14, Matrix Metalloproteinase 2, Middle Aged, Neoplasm Invasiveness, Pseudopodia, Relaxin, Thyroid Neoplasms, enzymology, genetics, metabolism, pathology	Molecular cancer research : MCR	9	eng	6	673	687	10.1158/1541-7786.MCR-10-0411	In this study, we identified differential expression of immunoreactive matrix metalloproteinase 2 (MMP2)/gelatinase A, membrane-anchored MT1-MMP/MMP14, and human relaxin-2 (RLN2) in human benign and malignant thyroid tissues. MMP2 and MT1-MMP were detected in the majority of thyroid cancer tissues and colocalized with RLN2-positive cells. MMP2 was mostly absent in goiter tissues and, similar to R…			406
148	JOUR	Apoptosis Activation in Thyroid Cancer Cells by Jatrorrhizine-Platinum(II) Complex via Downregulation of PI3K/AKT/Mammalian Target of Rapamycin (mTOR) Pathway.	Lu, KeBin, Wei, Wenjun, Hu, Jiaqian, Wen, Duo, Ma, Ben, Liu, Wanlin, Wang, Yu, Lu, Zhongwu	2020/04//	Animals, Apoptosis, Autophagy, Berberine, Cell Line, Tumor, Cell Proliferation, China, Female, Humans, Mice, Mice, Nude, Phosphatidylinositol 3-Kinases, Platinum, Proto-Oncogene Proteins c-akt, Signal Transduction, TOR Serine-Threonine Kinases, Thyroid Gland, Thyroid Neoplasms, Xenograft Model Antitumor Assays, analogs & derivatives, drug effects, drug therapy, metabolism, pathology, pharmacology	Medical science monitor : international medical journal of experimental and clinical research	26	eng		e922518	e922518	10.12659/MSM.922518	BACKGROUND Thyroid cancer, which is the most common endocrine cancer, has shown a drastic increase in incidence globally over the past decade. The present study investigated the thyroid cancer-inhibitory potential of jatrorrhizine-platinum(II) complex (JR-P(II) in vitro and in vivo. MATERIAL AND METHODS The JR-P(II)-mediated cytotoxicity in thyroid carcinoma cells was determined by using MTT assa…			407
341	JOUR	Carcinoembryonic antigen as a target for radioimmunotherapy of human medullary thyroid carcinoma: antibody processing, targeting, and experimental therapy with 131I and 90Y labeled MAbs.	Stein, R, Juweid, M, Mattes, M J, Goldenberg, D M	1999/02//	Animals, Antibodies, Monoclonal, Antibodies, Neoplasm, Carcinoembryonic Antigen, Carcinoma, Medullary, Drug Screening Assays, Antitumor, Female, Fluorescent Antibody Technique, Indirect, Half-Life, Humans, Iodine Radioisotopes, Maximum Tolerated Dose, Mice, Mice, Nude, Neoplasm Transplantation, Radioimmunotherapy, Radiometry, Radiotherapy Dosage, Thyroid Neoplasms, Tissue Distribution, Transplant…	Cancer biotherapy & radiopharmaceuticals	14	eng	1	37	47	10.1089/cbr.1999.14.37	The poor prognosis of patients with advanced medullary thyroid carcinoma (MTC) has prompted a search for new treatment modalities. In this report we explore the characteristics of carcinoembyronic antigen (CEA) as a target for radioimmunotherapy (RAIT) of MTC, with respect to antibody processing, targeting, and experimental therapy. In vitro studies showed a high level of CEA expression on the ce…			408
386	GEN	Papulonodular mucinosis with interstitial granulomatous dermatitis-like histological changes in a male patient with systemic lupus erythematosus.	Hashimoto, Takashi, Satoh, Takahiro	2017/03//	Adrenal Cortex Hormones, Adult, Antirheumatic Agents, Biopsy, Dermatitis, Diagnosis, Differential, Fluorescent Antibody Technique, Direct, Granuloma, Humans, Lupus Erythematosus, Systemic, Male, Methotrexate, Mucinoses, Thyroid Hormones, diagnosis, drug therapy, pathology, therapeutic use	The Journal of dermatology	44	eng	3	349	350	10.1111/1346-8138.13524				409
357	JOUR	Abnormal urothelial HLA-DR expression in interstitial cystitis.	Christmas, T J, Bottazzo, G F	1992/03//	Adult, Antibodies, Monoclonal, Biopsy, Cystitis, Dendritic Cells, Endothelium, Vascular, Epithelium, Female, Fluorescent Antibody Technique, HLA-DR Antigens, Histocompatibility Antigens Class I, Humans, Langerhans Cells, Lupus Erythematosus, Systemic, Middle Aged, Thyroiditis, Autoimmune, Urinary Bladder, analysis, immunology, microbiology, pathology	Clinical and experimental immunology	87	eng	3	450	454	10.1111/j.1365-2249.1992.tb03018.x	Interstitial cystitis is a chronic inflammatory disorder of the urinary bladder that predominantly afflicts middle-age women. The end stage of the disease is ulceration of the urothelium, the so-called Hunner's ulcer. The aetiology of interstitial cystitis remains obscure. We have studied bladder biopsies from 22 cases of interstitial cystitis and control groups consisting of six cases of bacteri…			410
578	JOUR	Expression of the cadherin-catenin complex in well-differentiated human thyroid neoplastic tissue.	Huang, S H, Wu, J C, Chang, K J, Liaw, K Y, Wang, S M	1999/11//	Adult, Aged, Blotting, Western, Cadherins, Cytoskeletal Proteins, Desmoplakins, Female, Fluorescent Antibody Technique, Humans, Male, Middle Aged, Thyroid Neoplasms, Trans-Activators, alpha Catenin, analysis, beta Catenin, chemistry, gamma Catenin	Thyroid : official journal of the American Thyroid Association	9	eng	11	1095	1103	10.1089/thy.1999.9.1095	E-cadherin is a member of the cadherin family that plays a major role in epithelial integrity and tumorigenesis. Catenins are a group of cytoplasmic proteins that regulate the intracellular anchorage of cadherin and are required for the linkage between cadherin and the actin cytoskeleton. Loss of E-cadherin contributes to the pathogenesis in tumor invasion and gives a poor prognosis. In order to …			411
224	JOUR	Management of thyroid nodules. II: Scanning techniques, thyroid suppressive therapy, and fine needle aspiration.	Ashcraft, M W, Van Herle, A J	1981///	Americium, Antithyroid Agents, Biopsy, Needle, Cesium Radioisotopes, Gallium Radioisotopes, Humans, Iodine Radioisotopes, Radioisotopes, Selenomethionine, Technetium, Thallium, Thyroid Neoplasms, diagnosis, drug therapy, pathology, therapeutic use	Head & neck surgery	3	eng	4	297	322	10.1002/hed.2890030406	For the differentiation of benign from malignant thyroidal disease, ultrasound displays anatomic but not histologic features. Other visualization techniques can be used including isotope scanning (radioiodine, 99m technetium, 241 americium fluorescence, 131 cesium, 67 gallium, 75 selenomethionine, 201 thallium, 32 phosphorus, 99m Tc-bleomycin, 197 mercury, 133 xenon), thermography, x-ray techniqu…			412
693	JOUR	Improved predictive test for MEN2, using flanking dinucleotide repeats and RFLPs.	Howe, J R, Lairmore, T C, Mishra, S K, Dou, S, Veile, R, Wells, S A Jr, Donis-Keller, H	1992/12//	Base Sequence, Chromosomes, Fungal, Chromosomes, Human, Pair 10, DNA, Single-Stranded, Female, Genetic Linkage, Genetic Markers, Genome, Human, Genomic Library, Genotype, Humans, In Situ Hybridization, Fluorescence, Karyotyping, Male, Molecular Sequence Data, Multiple Endocrine Neoplasia, Pedigree, Polymorphism, Restriction Fragment Length, Predictive Value of Tests, Repetitive Sequences, Nucleic…	American journal of human genetics	51	eng	6	1430	1442		Gene(s) for the autosomal dominant endocrine cancer syndromes, multiple endocrine neoplasia type 2A (MEN2A), multiple endocrine neoplasia type 2B (MEN2B), and familial medullary thyroid carcinoma (MTC1) all map to the pericentromeric region of chromosome 10. Predictive testing for the inheritance of mutant alleles in individuals at risk for these disorders has been limited by the availability of …			413
504	JOUR	[Chronic cold agglutinin disease in simultaneous immunologic thyroiditis].	Erdmann, H, Federlin, K, Feyen, H, Heimpel, H, Walb, D	1970/03//	Aged, Anemia, Hemolytic, Autoantibodies, Biopsy, Chronic Disease, Cryoglobulins, Female, Fluorescent Antibody Technique, Gastric Mucosa, Humans, Immunoelectrophoresis, Serologic Tests, Thyroid Gland, Thyroiditis, Autoimmune, analysis, complications, diagnosis, immunology, pathology	Medizinische Klinik	65	ger	10	437	442					414
378	JOUR	Studies of Y and Z, two hepatic cytoplasmic organic anion-binding proteins: effect of drugs, chemicals, hormones, and cholestasis.	Reyes, H, Levi, A J, Gatmaitan, Z, Arias, I M	1971/11//	Allyl Compounds, Animals, Benzopyrenes, Cholestasis, DDT, Densitometry, Dieldrin, Dwarfism, Pituitary, Electrophoresis, Disc, Ethinyl Estradiol, Hypophysectomy, Indocyanine Green, Liver, Male, Methylcholanthrene, Phenobarbital, Protein Binding, Proteins, Rats, Sulfobromophthalein, Thyroid Hormones, Thyroidectomy, blood, chemically induced, cytology, metabolism, pharmacology, physiology, physiopat…	The Journal of clinical investigation	50	eng	11	2242	2252	10.1172/JCI106721	The process by which various anions, including bilirubin and several dyes, drugs, hormones and their metabolites, are transferred from plasma into the liver cell is poorly understood. Two hepatic cytoplasmic proteins, Y and Z, that bind various organic anions in vivo and in vitro have been postulated to be involved in this process. The concentration of Y, the major organic anion-binding protein, …			415
203	JOUR	Peritumoral implantation of hydrogel-containing nanoparticles and losartan for enhanced nanoparticle penetration and antitumor effect.	Shen, Haijun, Gao, Qianqian, Ye, Qi, Yang, Shiyun, Wu, Yuqian, Huang, Qin, Wang, Xiaona, Sun, Zhenhua	2018///	Animals, Antineoplastic Agents, Cell Line, Tumor, Cell Proliferation, Doxorubicin, Endocytosis, Fluorescence, Humans, Hydrogels, Implants, Experimental, Losartan, Mice, Nude, Nanoparticles, Neoplasms, Particle Size, Polyethylene Glycols, Polystyrenes, analogs & derivatives, chemistry, drug effects, drug therapy, pathology, pharmacology, therapeutic use, ultrastructure	International journal of nanomedicine	13	eng		7409	7426	10.2147/IJN.S178585	BACKGROUND AND PURPOSE: Nanoparticle-loaded hydrogels - localized drug delivery devices containing a combination of therapeutic nanoparticles and implantable hydrogel - have been recipients of increased focus and interest for cancer treatment. However, it is difficult for the released nanoparticles to penetrate deeply into tumors because of the dense collagen network in the tumor extracellular ma…			416
742	JOUR	GPVIâFcâPEG improves cerebral infarct volume and cerebral thrombosis in mouse model with cerebral thrombosis.	Wufuer, Yimae, Shan, Xuefeng, Sailike, Magaoweiya, Adilaimu, Kamile, Ma, Songfeng, Wang, Huguo	2017/11//	Animals, Blood Platelets, Cattle, Cell Adhesion, Cerebral Infarction, Collagen, Disease Models, Animal, Female, Fibrinolytic Agents, Immunoglobulin Fc Fragments, Intracranial Thrombosis, Mice, Mice, Inbred C57BL, Platelet Membrane Glycoproteins, Polyethylene Glycols, Protein Binding, Stroke, chemistry, drug effects, drug therapy, genetics, metabolism, pathology, therapeutic use, von Willebrand Fa…	Molecular medicine reports	16	eng	5	7561	7568	10.3892/mmr.2017.7556	Cerebral thrombosis is one of the most common causes of cerebral infarction, and anticoagulation therapy is a routine treatment in patients with hemorrhagic cerebral venous thrombosis. The hemostatic function of platelets is important for the anticoagulation therapy of thrombosis. GlycoproteinÂ VI (GPVI) is reported as the major signaling receptor for collagen and is exclusively expressed on plat…			417
[truncated: 346 more rows]

## Sheet: Blad1
first_authors	publication_year	alternate_title3	doi
Akbulut, Serkan, Erten, Ozgun, Gokceimam, Mehmet, Kim, Yoo S, Krishnamurthy, Vikram, Heiden, Katherine, Jin, Judy, Siperstein, Allan, Berber, Eren	2021/03//	Journal of surgical oncology	10.1002/jso.26336
Alesina, P F, Meier, B, Hinrichs, J, Mohmand, W, Walz, M K	2018/05//	Langenbeck's archives of surgery	10.1007/s00423-018-1665-2
Barbieri, Diego, Triponez, FrÃ©dÃ©ric, Indelicato, Pietro, Vinciguerra, Alessandro, Trimarchi, Matteo, Bussi, Mario	2021/07//	Langenbeck's archives of surgery	10.1007/s00423-021-02228-3
[truncated: 61 more rows]
