# Supplementary material for: Heterogeneity in Utilization of Optical Imaging Guided Surgery for Identifying or Preserving the Parathyroid Glands—A Meta-Narrative Review
Source: Life (Basel). 2022 Mar 8;12(3):388. doi: 10.3390/life12030388 (PMC8955594; doi:10.3390/life12030388)
Supplement: Supplementary file 1 [file life-12-00388-s001.zip › Table S3; dataset.xlsx]

## Sheet: Autofluorescence
Appl.	First author	Origin	Publ.	Journal	Study design	Surgery	Sample size	Imaging technique	In/ex vivo imaging	Feasibility	Validation	Clinical consequences	Quantification signal	Camera angle	Distance to woundbed	Overhead light	Settings camera
AF	Kim	South Korea	2018-02-01	Journal of the American College of Surgeons	Prospective cohort	Tx	38	Digital camera and NIR diode + illuminator	In vivo	Yes	No	No	Postoperatively	-	-	-	-
AF	Kim	South Korea	2016-12-01	Journal of Clinical Endocrinology and Metabolism	Prospective cohort	Tx	8	Digital camera and NIR diode + illuminator	In vivo	Yes	Visual scoring	No	No	-	-	Turned off	Described (exposure time)
ICG + AF	Alesina	Germany	2018-03-01	Langenbeck's Archives of Surgergy	Prospective cohort	PTx/ Tx	5	Endoscopy NIR camera (Karl Storz)	In vivo	Yes	No	No	No	N/A	N/A	N/A	-
AF	Ladurner	Germany	2018-01-01	Annals of the Royal College of Surgeons of England	Prospective cohort	Laparoscopic-Tx	20	Endoscopy NIR camera (Karl Storz)	In vivo	Yes	No	No	No	-	5cm, handheld	Turned off	-
ICG + AF	Ladurner	Germany	2019-07-01	Molecules	Prospective cohort	PTx/ Tx	117	Endoscopy NIR camera (Karl Storz)	In vivo	Yes	No	No	No	-	5cm, handheld	Turned off	-
AF	Ladurner	Germany	2017-08-01	Surgical Endoscopy	Prospective cohort	Laparoscopic-PTx/ Tx	30	Endoscopy NIR camera (Karl Storz)	in vivo	Yes	Visual scoring	Yes (in 2 cases)	No	N/A	N/A	N/A	-
ICG + AF	Lerchenberger	Germany	2019-09-01	International Journal of Endocrinology	Prospective cohort	PTx/ Tx	50	Endoscopy NIR camera (Karl Storz)	In vivo	Yes	Visual	-	No	-	5cm, handheld	-	-
AF	Liu	China	2020-01-01	BMC Surgery	Prospective cohort	Tx	20	i-Raman Pro NIR camera	In vivo	Yes	Frozen section or visual	Yes	Postoperatively	-	-	Turned off	Described (exposure time)
AF	Serra	Portugal	2020-08-01	Gland Surgery	Prospective cohort	Tx	40	NIR camera (different fabricants)	Ex vivo	Yes	Histopathology and postoperative PTH	No	No	-	-	Turned off	-
AF	Akbulut	USA	2021-03-01	Journal of Surgical Oncology	Prospective cohort	PTx/ Tx	300	NIR camera (Fluobeam or Fluobeam LX)	-	Yes	-	-	-	-	-	-	-
ICG + AF	Barbieri	Italy	2021-07-01	Langenbeck's Archives of Surgergy	Prospective cohort	Tx	20	NIR camera (Fluobeam)	In vivo	No (description of process)	-	Yes	No	-	15-20cm, handheld	-	-
AF	Bellier	France	2021-07-01	World Journal of Surgery	Prospective cohort	Tx	70	NIR camera (Fluobeam)	Ex vivo	Yes	Histopathology	No	No	-	20cm, handheld	Turned off	-
AF	Benmiloud	France	2018-01-01	Surgery	Non-randomized controlled study	Tx	513	NIR camera (Fluobeam)	In vivo	Yes	No	Yes	No	-	15-20cm, handheld	Turned off	-
AF	Benmiloud	France	2020-02-01	JAMA Surgery	RCT	Tx	241	NIR camera (Fluobeam)	In vivo	No (RCT)	Visual, PTH postoperatively	Yes	No	-	-	Turned off	-
AF	De Leeuw	France	2016-09-01	World Journal of Surgery	Prospective cohort	PTx/ Tx	63	NIR camera (Fluobeam)	In and ex vivo	Yes	Histopathology or visual scoring	Yes	Postoperatively	-	20 cm, unknown if handheld	Turned off	Described (exposure time)
AF	DiMarco	UK	2019-09-01	Annals of the Royal College of Surgeons of England	Prospective cohort	Tx	269	NIR camera (Fluobeam)	In vivo	Yes	Partly, histopathology on thyroid specimen	Yes	No	-	20cm, handheld	Turned off	-
AF	Dip	Argentina	2019-05-01	Journal of the American College of Surgeons	RCT	Tx	170	NIR camera (Fluobeam)	In vivo	No (RCT)	No	No	No	-	-	-	-
AF	Falco	Argentina	2016-08-01	Journal of the American College of Surgeons	Prospective cohort	PTx/ Tx	28	NIR camera (Fluobeam)	In vivo	Yes	Histopathology	-	Postoperatively	-	-	Turned off	Described (exposure time)
AF	Kahramangil	USA	2018-04-01	Annals of Surgical Oncology	International multicenter retrospective cohort	PTx/ Tx	210	NIR camera (Fluobeam)	In vivo	Yes	Histopathology	-	No	-	-	Turned off	-
AF	Kim	USA	2020-10-01	Journal of Surgical Oncology	Retrospective cohort	Tx	300	NIR camera (Fluobeam)	In and ex vivo	Yes	Visual, histopathology only on dissected PGs	Yes	No	-	-	-	-
AF	Kose	USA	2020-01-01	Surgery (United States)	Prospective cohort	PTx/ Tx	310	NIR camera (Fluobeam)	In and ex vivo	Yes	Visual, histopathology on PG specimen	No	No	-	20cm, handheld	Turned off	-
AF	Papavramidis	Greece	2021-01-01	Endocrine	RCT (single-blinded)	Tx	180	NIR camera (Fluobeam)	In and ex vivo	No (RCT)	PTH postoperatively	Yes	No	-	-	Partly turned off	-
AF	van Slycke	Belgium	2021-08-01	Surgical Innovation	Prospective cohort	Tx	40	NIR camera (Fluobeam)	In and ex vivo	Yes	PTH postoperatively	-	No	-	-	Turned off	-
AF	Thomas	USA	2019-09-01	Journal of the American College of Surgeons	Prospective cohort	PTx/ Tx	20	NIR camera (PDE-Neo II) vs PTeye	In and ex vivo	Yes	Visual scoring	-	Real-time or postoperatively	-	5cm, handheld	Turned off	-
AF	Idogawa	Japan	2020-05-01	European Archives of Oto-Rhino-Laryngology	Prospective cohort	PTx/ Tx	45	NIR camera (PDE-Neo)	In vivo	Yes	Visual scoring	Yes	No	-	-	Turned off	-
AF	Shinden	Japan	2017-06-01	World Journal of Surgery	Prospective cohort	PTx/ Tx	17	NIR camera (PDE-Neo)	In and ex vivo	Yes	Yes, frozen section	-	Postoperatively	-	-	Turned off	Described
AF	Takahashi	Japan	2020-10-01	Laryngoscope	Prospective cohort	Tx	36	NIR camera (PDE-Neo)	In and ex vivo	Yes	Histopathology (in situ PGs were excluded)	Yes	No	-	5cm, unknown if handheld	-	-
ICG + AF	Kahramangil	USA	2017-12-01	Gland Surgery	Prospective cohort	Tx	44	NIR camera (Pinpoint for ICG, Fluobeam for AF)	In vivo	Yes	No	No	No	-	-	Turned off	-
AF	Falco	Argentina	2017-09-01	Surgical Endoscopy	Retrospective review of prospective data	PTx/ Tx	74	NIR camera, unknown system	In vivo	Yes	No	-	Postoperatively	-	-	Turned off	-
AF	Kim	South Korea	2021-09-01	Thyroid : official journal of the American Thyroid Association	Retrospective cohort	Tx	542	NIR camera, unknown system	In and ex vivo	Yes	Visual scoring, PTH postoperatively	-	No	-	-	Partly turned off	-
AF	Thomas	USA	2021-11-01	American Journal of Surgery	Prospective cohort	PTx/ Tx	167	PTEye	In vivo	Yes	Histopathology or visual scoring	No	Real-time	-	0cm	Not relevant (PTEye)	-
AF	Thomas	USA	2019-01-01	Surgery	Prospective cohort	PTx/ Tx	41	Pteye and Overlay Tissue Imaging System	In vivo	Yes	Visual	No	No	-	-	Not relevant (PTEye)	-
AF	Thomas	USA	2018-11-01	Thyroid	Prospective cohort	PTx/ Tx	197	Spectrometer and Pteye	In vivo	Yes	Histopathology or visual scoring	No	Real-time	-	-	Not relevant (PTEye)	-
AF	McWade	USA	2013-12-01	Surgery	Prospective cohort	Tx	45	Spectroscopy	In vivo	Yes	Histopathology (22/45), visual scoring	No	Real-time	-	0cm	Turned off	-
AF	Paras	USA	2011-06-01	Journal of Biomedical Optics	Prospective cohort	PTx/ Tx	21	Spectroscopy	In vivo	Yes	Histopathology (4/21), visual scoring	No	Real-time	-	0cm	-	-
AF	McWade	USA	2016-01-01	Surgery	Prospective cohort	PTx/ Tx	137	Spectroscopy	In vivo	Yes	Histopathology or visual scoring	No	Real-time	-	0cm	Turned off	-
AF	McWade	USA	2014-12-01	Journal of Clinical Endocrinology and Metabolism	Prospective cohort	PTx/ Tx	116	Spectroscopy and NIR camera (Karl Storz)	In vivo	Yes	Visual scoring	No	Real-time	-	0cm (spectroscopy), 15cm (NIR camera), unknown if handheld	Turned off	-
AF	Berber	USA	2021-12-01	Journal of Surgical Oncology	Retrospective cohort	PTx/ Tx	239	Unknown device	Ex vivo	Yes	Histopathology	No	Real-time	-	-	-	-

## Sheet: ICG
Application	First author	Origin	Publ.	Journal	Study design	Surgery	Sample size	Imaging technique	Feasibility	Validation	Clinical consequences?	Quantification signal	Camera angle	Distance to woundbed	Overhead light	Dose ICG	Injectionprotocol	Video/image	Settings camera
ICG	Fortuny	Switzerland	2016-04-01	British Journal of Surgery	Prospective cohort	Tx	36	Laparoscopy NIR camera (Pinpoint)	Yes	Visual	Yes	No	-	-	-	8.75mg per dose, repeatedly, max. 5 mg/kg/day	-	Recorded Images	-
ICG	Zaidi	USA	2016-06-01	Journal of Surgical Oncology	Prospective cohort	Tx	27	NIR camera (Pinpoint)	Yes	Visual	-	No	-	-	-	5mg	-	-	-
ICG	Lang	China	2017-01-01	Surgery (United States)	Prospective cohort	Tx	70	NIR camera (SPY)	Yes	PGs biopsies	-	Intraoperatively	Perpendicular	15-20 cm	-	2.5mg	-	Video	Heat map mode, 15 seconds image aquisition after injection
ICG	Yu	Korea	2017-07-01	Surgical Endoscopy	Prospective cohort	Tx	66	NIR camera (da Vinci Si robot system)	Yes	io-PTH assay	No	No	-	-	-	10mg	'Slow injection''	-	-
ICG + AF	Kahramangil	USA	2017-12-01	Gland Surgery	Prospective cohort	Tx	44	Pinpoint for ICG, Fluobeam for AF	Yes	No	No	No	-	-	-	5mg	-	-	-
ICG + AF	Alesina	Germany	2018-03-01	Langenbeck's Archives of Surgergy	Prospective cohort	PTx/Tx	5	Laparoscopy NIR camera (Karl Storz)	Yes	No	Yes	No	-	-	-	2.5mg, max. 3 times	-	-	-
ICG	Fortuny	Switzerland	2018-03-01	British Journal of Surgery	RCT	Tx	196	Laparoscopy NIR camera (Pinpoint)	Yes	No	Yes	No	-	-	-	Max. 5mg/kg	-	Recorded Images	-
ICG	Jin	China	2018-12-01	Advances in Therapy	Prospective cohort	Tx	26	Digi-MIH-001 imaging system	Yes	Visual	Yes	No	-	-	-	5mg and max. 5mg/kg/day	-	Images	Brightness: minimum, Contrast: maximum, Excitation 30Hz
ICG	van den Bos	Netherlands	2019-02-01	Head and Neck	Prospective cohort	Tx	26	Laparoscopy NIR camera (Karl Storz)	Yes	Visual	Yes	Post-operative TBR	-	-	-	7.5 mg, twice	-	Video	-
ICG	Jin	China	2019-03-01	Clinical Endocrinology	Prospective cohort	Tx	26	Digi-MIH-001 imaging system	Yes	Visual and post-op PTH	Yes	No	-	-	-	5 mg	-	Video	Brightness: minimum, Contrast: maximum, Excitation 30Hz
ICG	Rudin	USA	2019-06-01	World Journal of Surgery	Retrospective cohort	Tx	210	Laparoscopy NIR camera (Pinpoint)	Yes	No	No	No	-	-	-	3-10 ml, unknown solution	-	-	-
ICG + AF	Ladurner	Germany	2019-07-01	Molecules	Retrospective cohort	PTx/Tx	117	NIR-endoscope (Karl Storz)	Yes	No	No	No	-	-	-	5 mg	-	-	-
ICG + AF	Lerchenberger	Germany	2019-09-01	International Journal of Endocrinology	Prospective cohort	PTx/Tx	50	NIR-endoscope (Karl Storz)	Yes	-	-	No	-	-	-	5 mg	-	Images	-
ICG	Razavi	USA	2019-09-01	Head and Neck	Retrospective cohort	Tx	43	Unknown NIR camera + laparoscopy NIR camera (Olympus)	Yes	-	Yes	No	-	-	-	5 mg	-	-	-
ICG	Gálvez-Pastor	Spain	2019-11-01	American Journal of Surgery	Prospective cohort	Tx	39	Laparoscopy NIR camera (Pinpoint)	Yes	No	-	No	-	-	-	7.5-15 mg multiple times, max. 5mg/kg/day	-	Recorded Images	-
ICG	Llorente	Spain	2020-01-01	JAMA Surgery	Prospective cohort	Tx	50	Unknown	Yes	Visual and post-op PTH	No	No	-	-	-	-	-	-	-
ICG	Yavuz	Turkey	2020-04-20	Archives of Endocrinology and Metabolism	Prospective cohort	Tx	43	NIR camera (SPY)	Yes	Visual	Yes	No	Perpendicular	15-20 cm	-	7.5mg	-	Recorded Images	-
ICG	Papavramidis	Greece	2020-09-20	Endocrine Practice	Prospective multicenter	Tx	60	NIR camera (OPAL)	Yes	Visual	No	No	-	-	-	5mg	-	Images	-
ICG	Turan	Turkey	2020-10-01	Photodiagnosis and Photodynamic Therapy	Retrospective cohort	Tx/PTx	7	Laparoscopy NIR camera (Olympus)	Yes	io-PTH assay	No	No	-	-	-	10mg	Slow from peripheric vascular way	-	-
ICG	Jin	China	2020-12-20	Endocrine Practice	RCT	Tx	56	Digi-MIH-001 imaging system	No (RCT)	No	Yes	No	-	-	-	0.04mg/kg, multiple times, max. 5mg/kg/day	-	Recorded Images	-
ICG	Llorente	Spain	2021-04-27	Cirugia Espanola	Prospective cohort	Tx	50	NIR camera (SPY)	Yes	Visual scoring and io-PTH assay	No	No	-	-	-	7.5mg multiple times, max. 5mg/kg	-	-	-
ICG	Parfentiev	Georgia	2021-05-01	Georgian Med News	RCT	Tx	58	Laparoscopy NIR camera (Karl Storz)	No (RCT)	Visual	Yes	No	-	-	-	15mg	-	Video	-
ICG + AF	Barbieri	Italy	2021-07-01	Langenbeck's Archives of Surgergy	Prospective cohort	Tx	20	NIR camera (Fluobeam)	Yes	-	Yes	No	-	-	-	5mg	-	-	-
ICG	Noltes	Netherlands	2021-12-01	Annals of Surgery	Prospective multicenter	Tx	10	NIR camera (SPY)	Yes	Visual and post-op PTH	No	Postoperatively inflow/outflow curve	Perpendicular	20 cm	Turned off	5mg, twice	-	Video	-

## Sheet: Other
Application	First author	Origin	Publ.	Journal	Study design	Surgery	Sample size	Imaging technique	Feasibility	Validation	Clinical consequences?	Quantification signal	Camera angle	Distance to woundbed	Overhead light	Settings camera
LSCI	Mannoh	USA	2017-11-01	Scientific Reports	Prospective cohort	PTx/Tx	7	LSCI device	Yes	Histology if available	No	Real-time	Described	-	Described: not relevant	Described
LSCI	Mannoh	USA	2021-10-01	Thyroid	Prospective cohort	Tx	72	LSCI device	Yes	Visual scoring	No	Real-time	-	-	-	-
